# Supplementary material
Source: PubMed Central journal article supplement (PMC6645972)

**Pyrimidine Nucleosides with Reactive ( $\beta$ -Chlorovinyl)sulfone or ( $\beta$ -Keto)sulfone Group at C5 Position,  
Their Reactions with Nucleophiles and Electrophiles, and Polymerase-catalyzed Incorporation into DNA**

Sazzad H. Suzol,<sup>1</sup> A. Hasan Howlader,<sup>1</sup> Zhiwei Wen,<sup>1</sup> Yaou Ren,<sup>1</sup> Eduardo E. Laverde,<sup>1</sup> Carol Garcia,<sup>1</sup> Yuan Liu,<sup>1,2</sup> and Stanislaw F. Wnuk<sup>1,\*</sup>

<sup>1</sup>*Department of Chemistry and Biochemistry, Florida International University, Miami, Florida 33199, USA.*

<sup>2</sup>*Biomolecular Sciences Institute, Florida International University, Miami, Florida 33199, USA.*

[wnuk@fiu.edu](mailto:wnuk@fiu.edu)

## SUPPORTING INFORMATION

<sup>1</sup>H, <sup>13</sup>C, and <sup>31</sup>P NMR spectra for all new compounds: Figures S1-S59; Pages S2-S60.

-7.86  
 -7.65  
 -7.31  
 -7.10  
 6.08  
 6.07  
 5.70  
 5.49  
 5.39  
 5.38  
 5.36  
 4.46  
 4.38  
 -2.39  
 2.15  
 2.13  
 2.10

Figure S1. <sup>1</sup>H NMR, (400 MHz), CDCl<sub>3</sub>

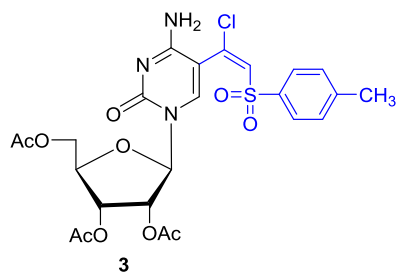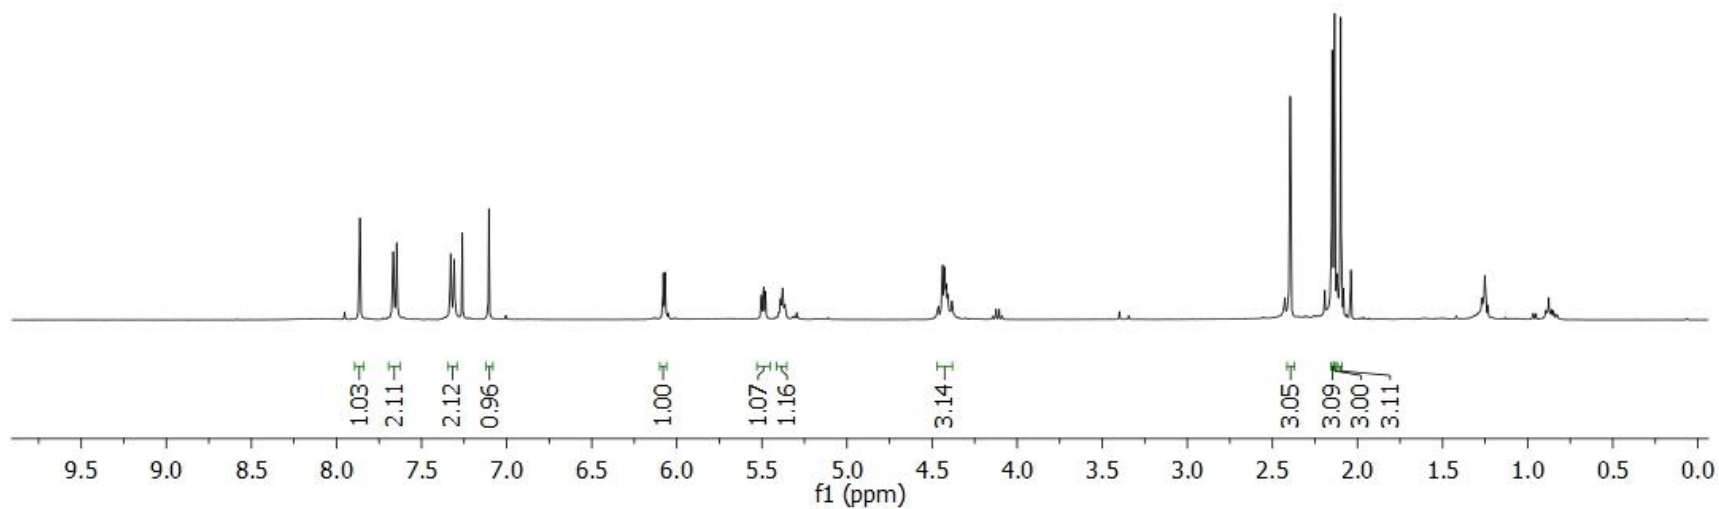

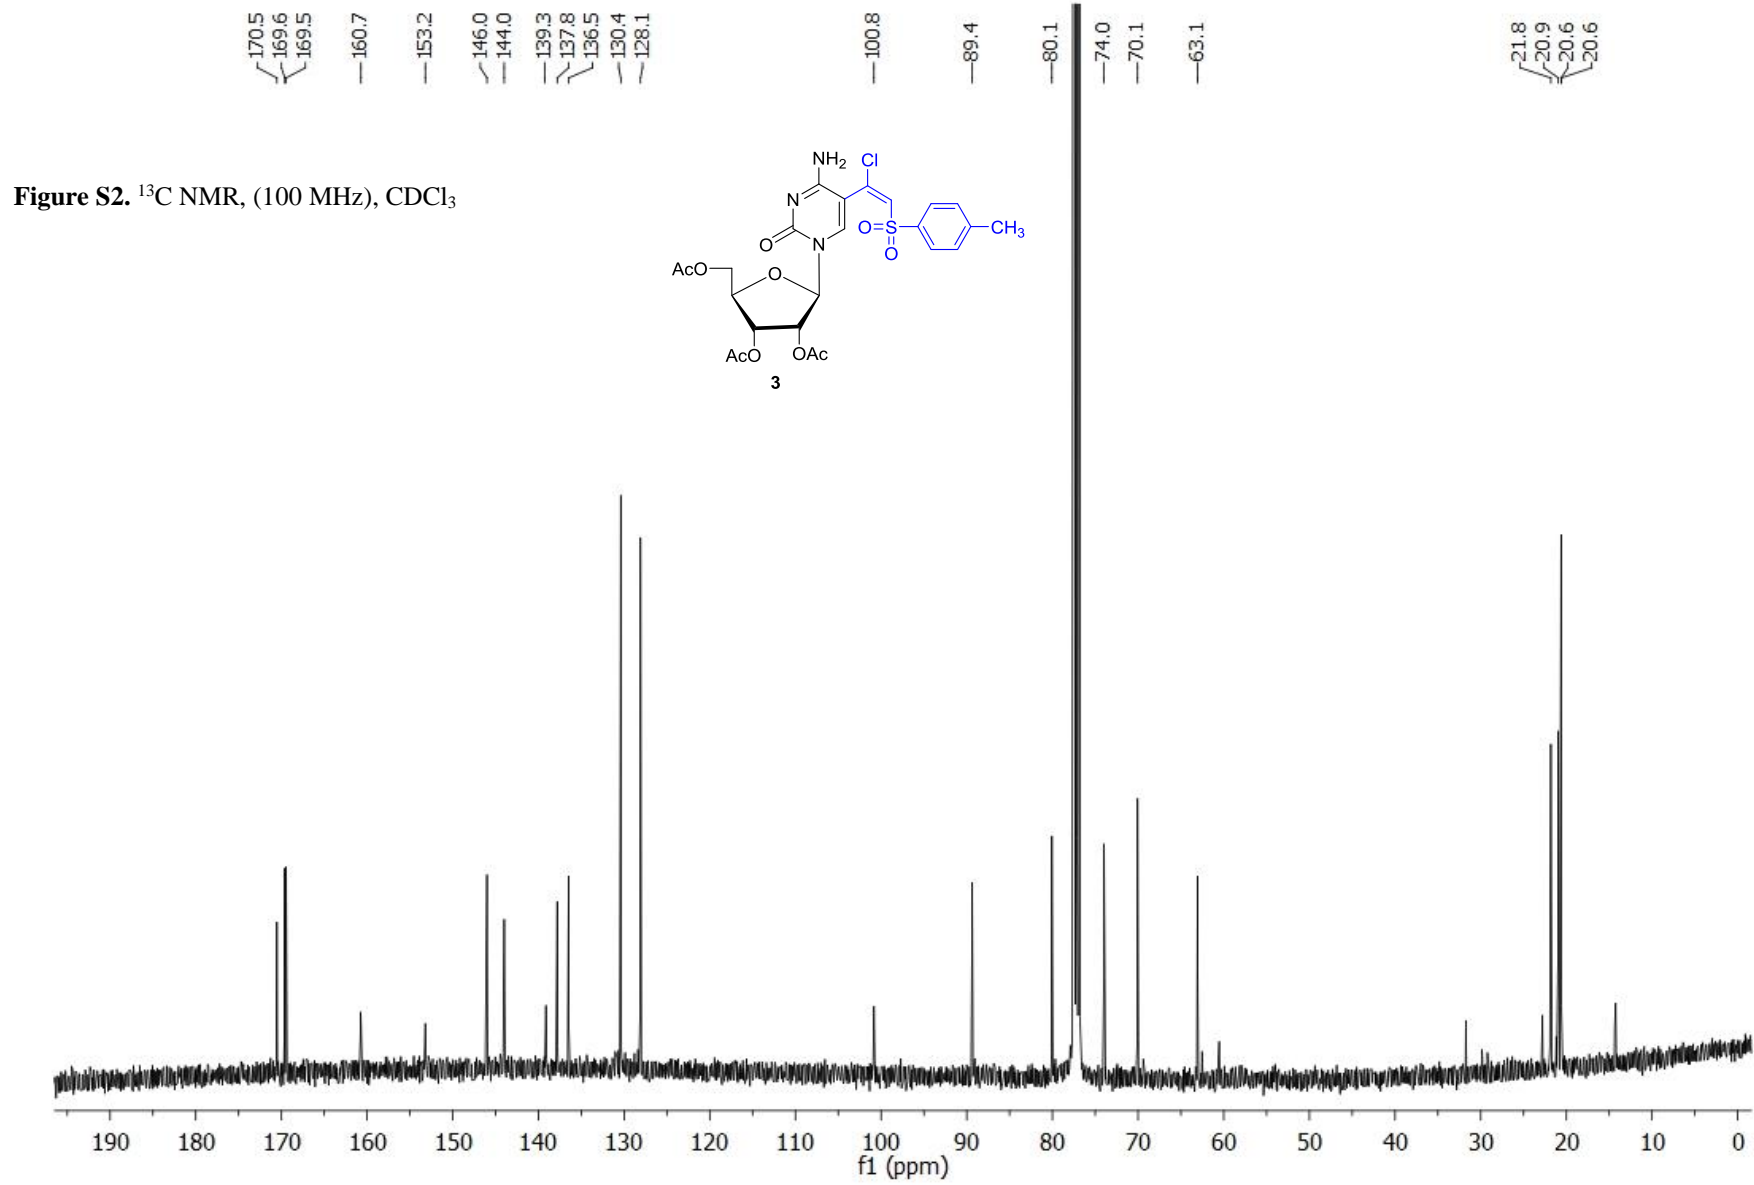

-7.91  
 -7.60  
 -7.31  
 -7.01  
 6.34  
 6.33  
 6.32  
 6.31  
 5.25  
 5.20  
 4.44  
 4.43  
 4.41  
 4.40  
 4.38  
 4.29  
 2.72  
 2.70  
 2.69  
 2.67  
 -2.41  
 -2.27  
 -2.25  
 -2.24  
 -2.22  
 -2.20  
 -2.12  
 -2.10

**Figure S3.**  $^1\text{H}$  NMR, (400 MHz),  $\text{CDCl}_3$

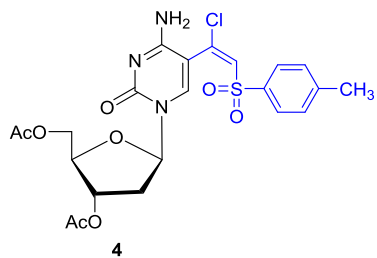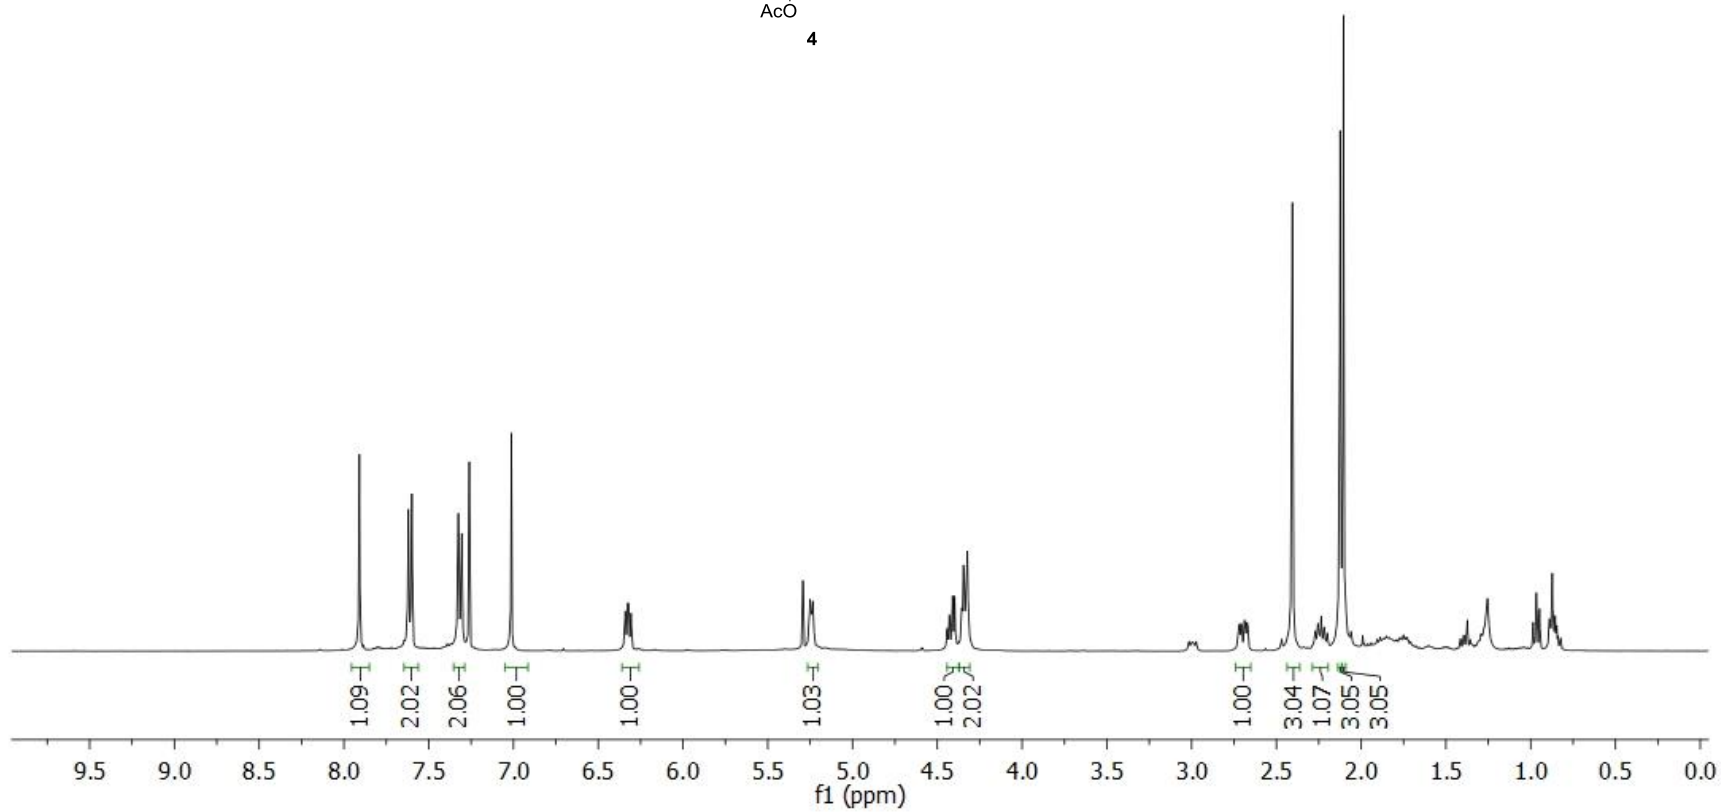

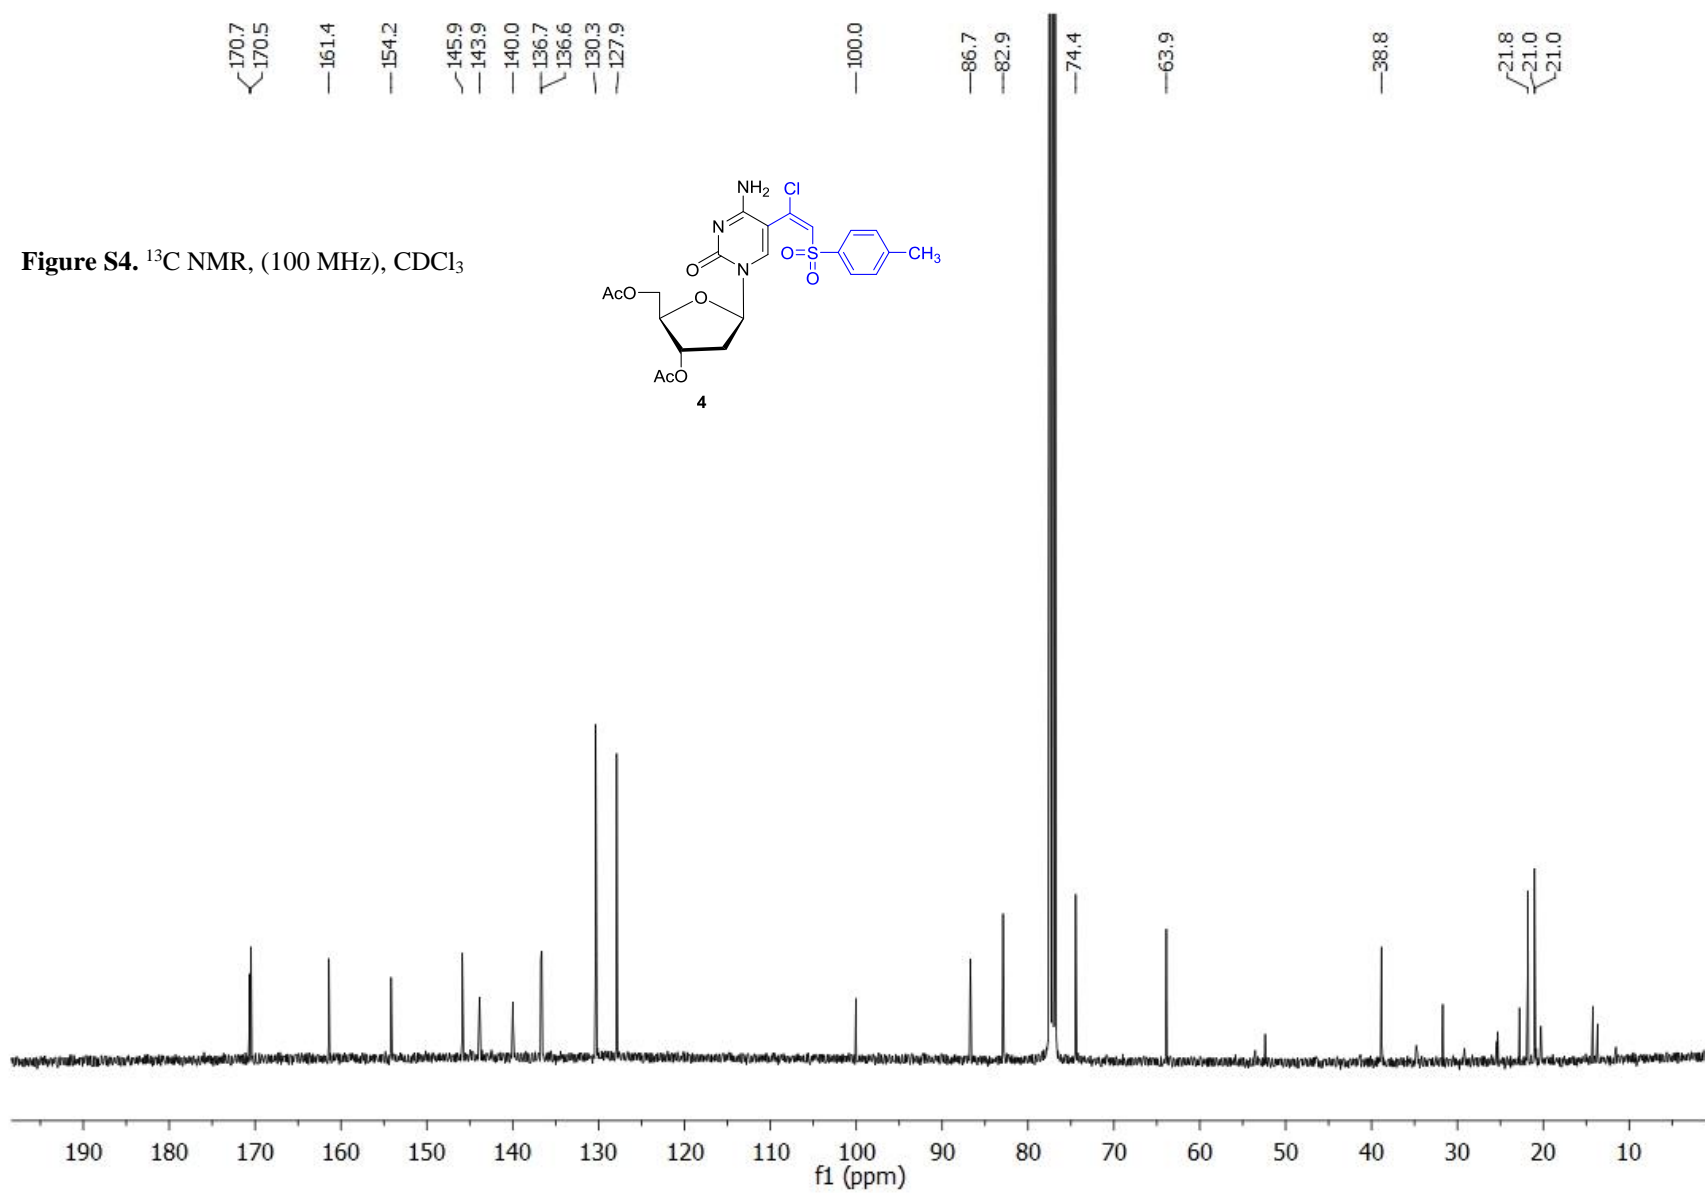

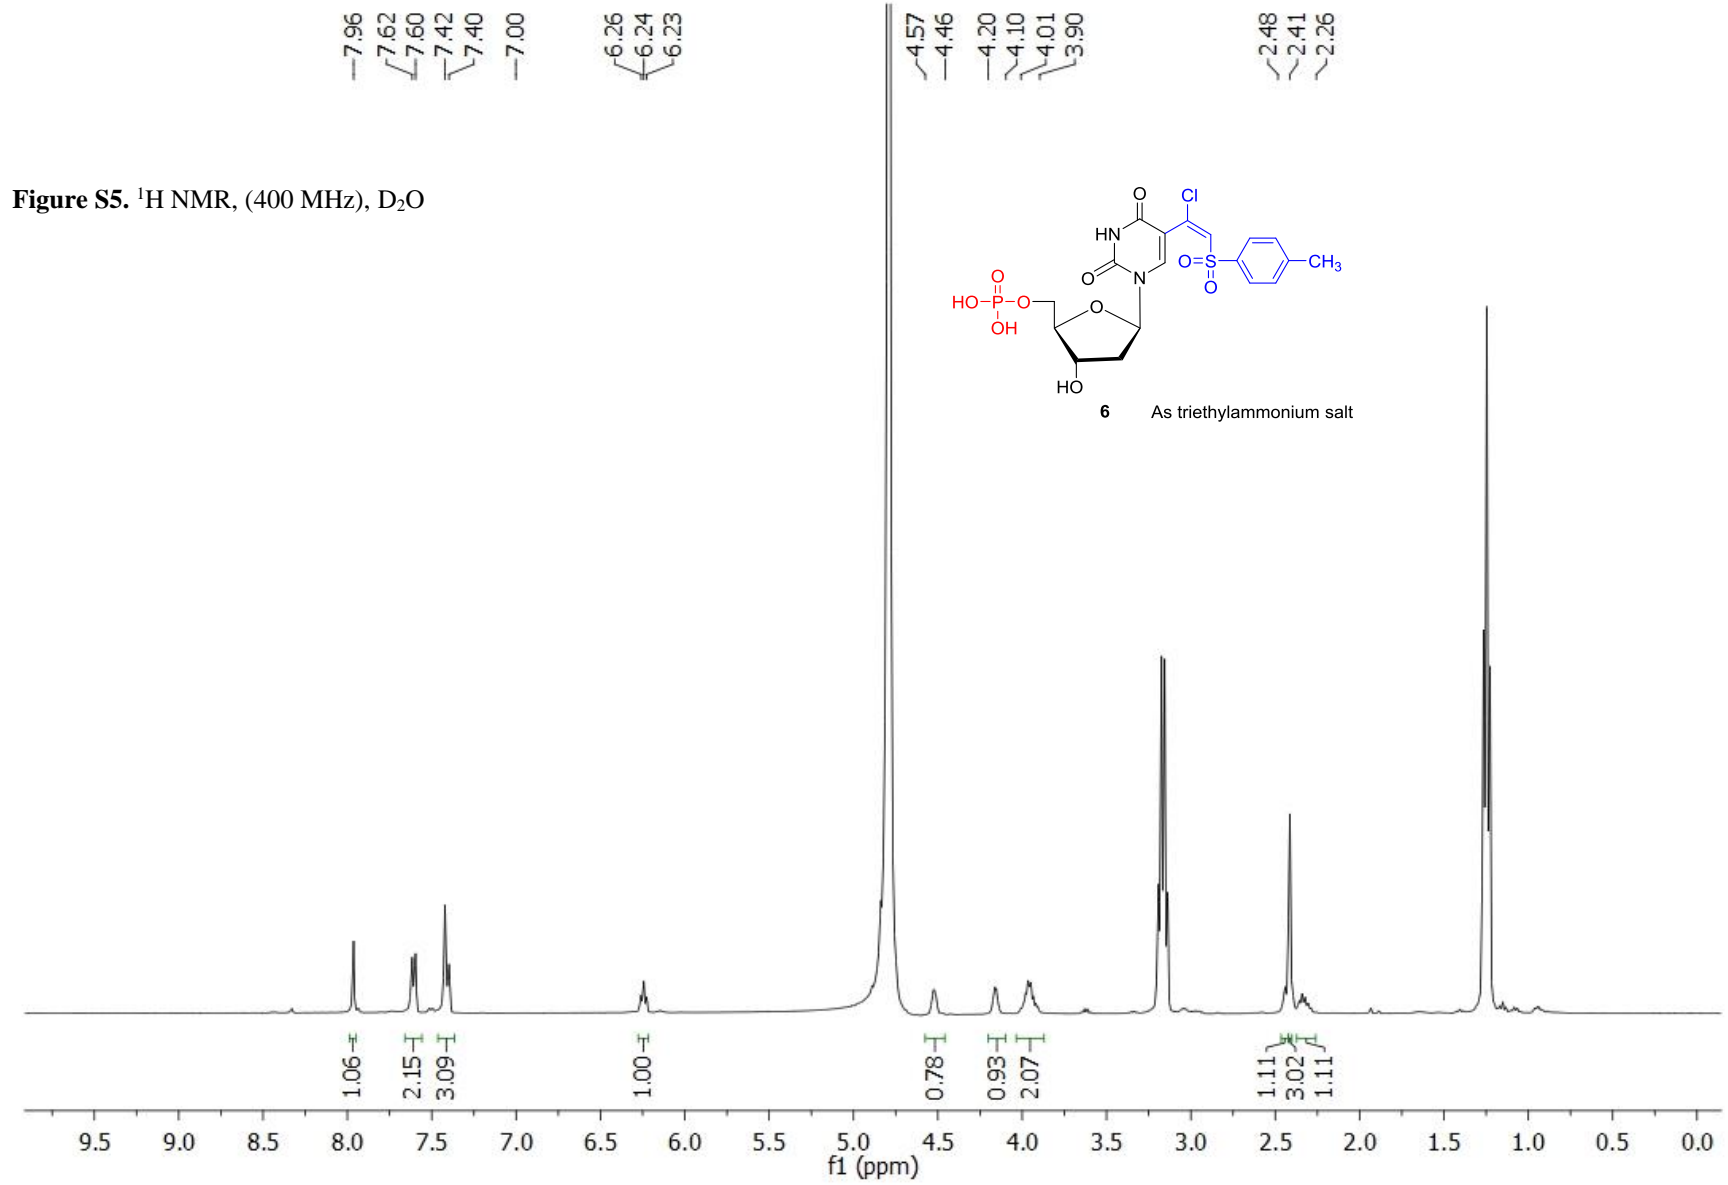

Figure S6. <sup>13</sup>C NMR, (100 MHz), D<sub>2</sub>O

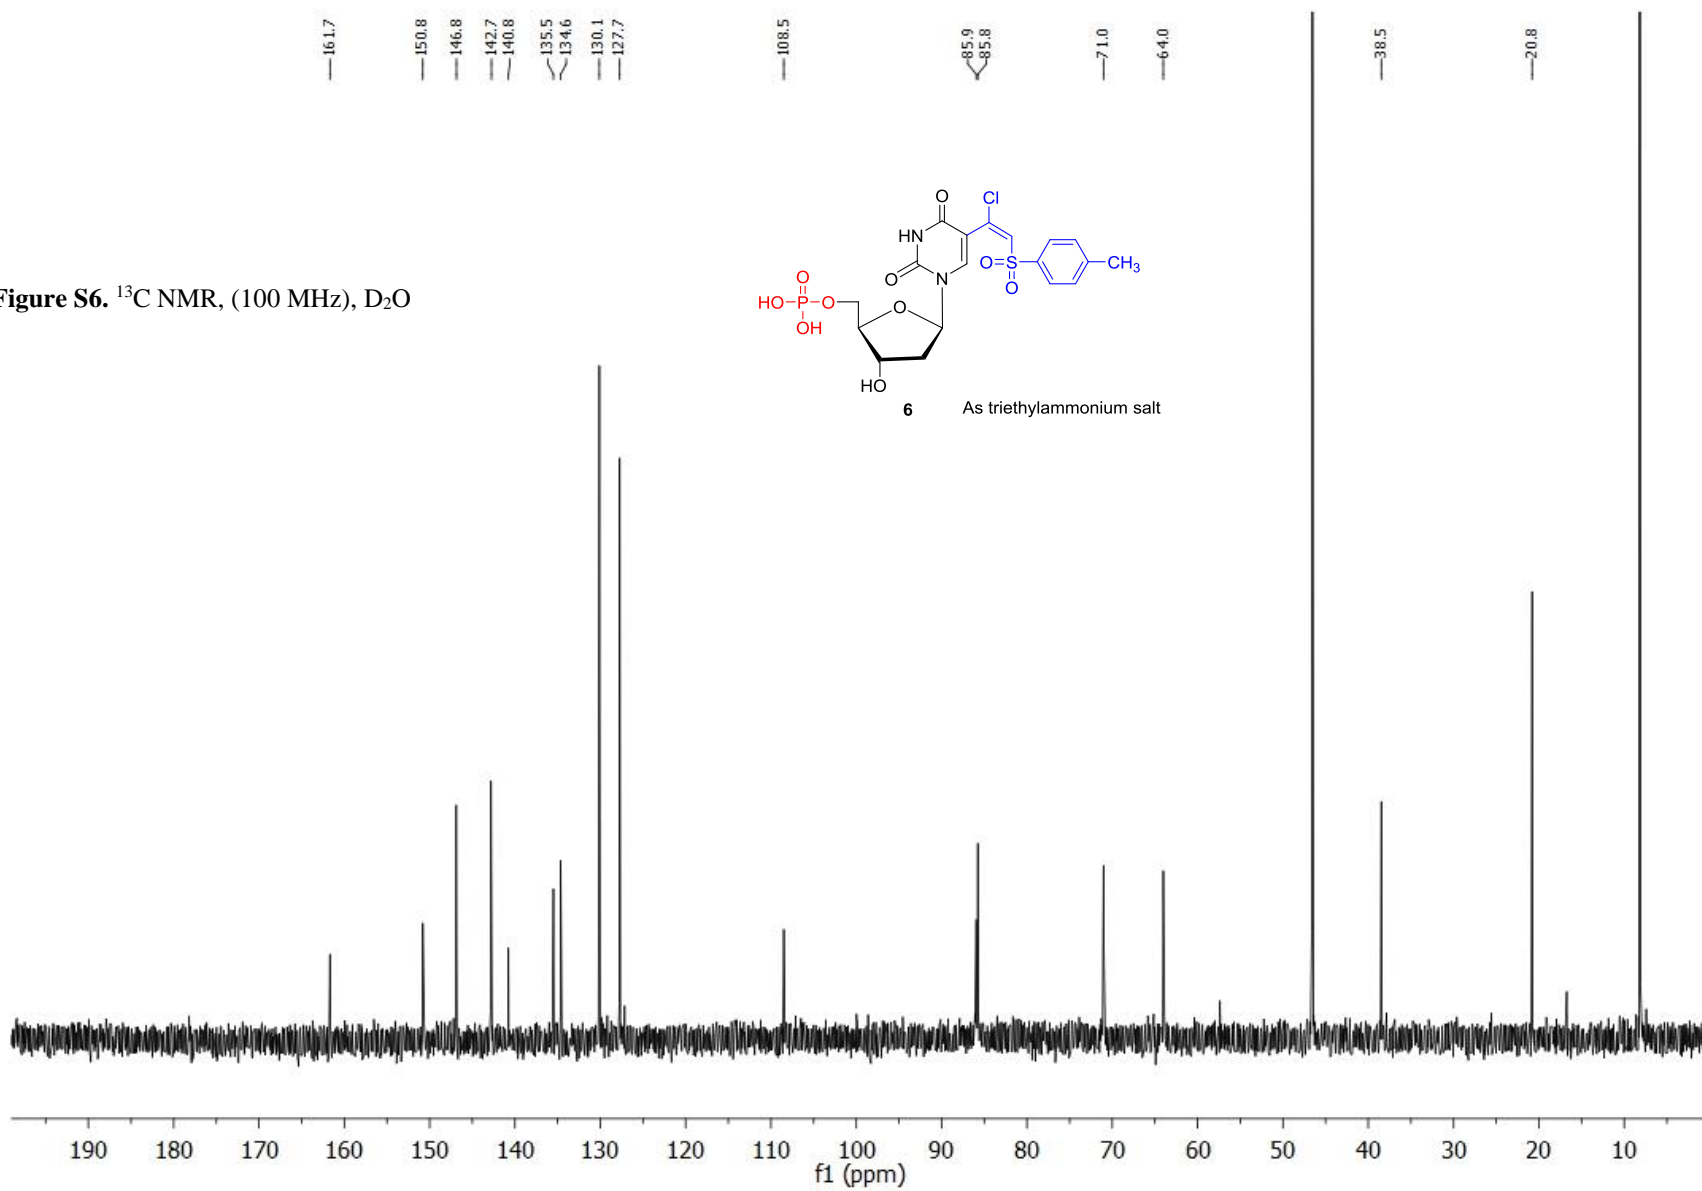

-2.69

Figure S7.  $^{31}\text{P}$  NMR, (162 MHz),  $\text{D}_2\text{O}$

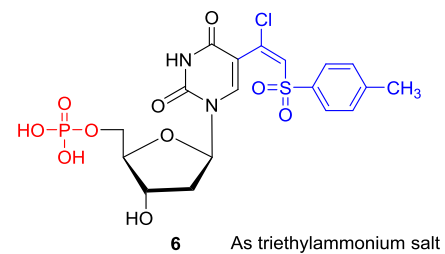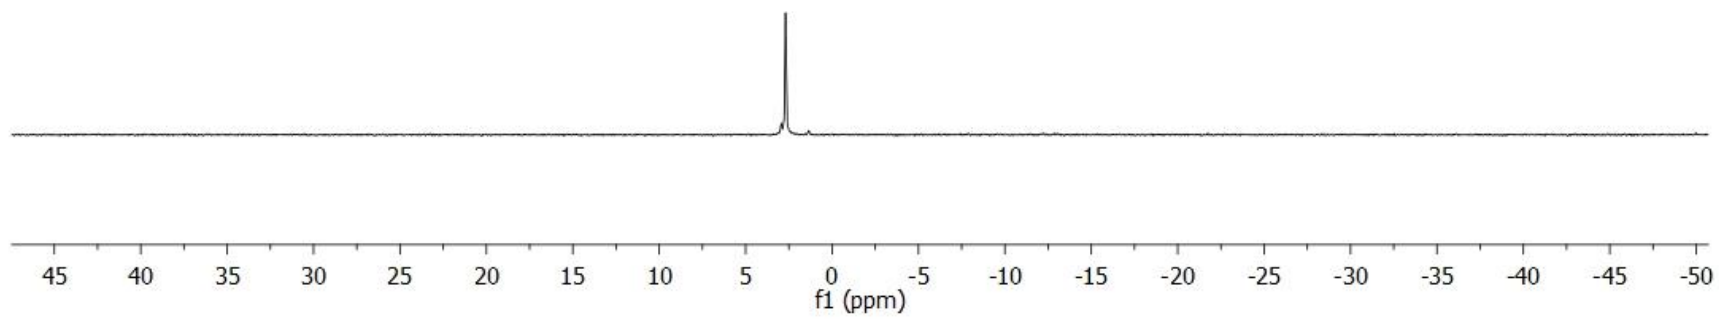



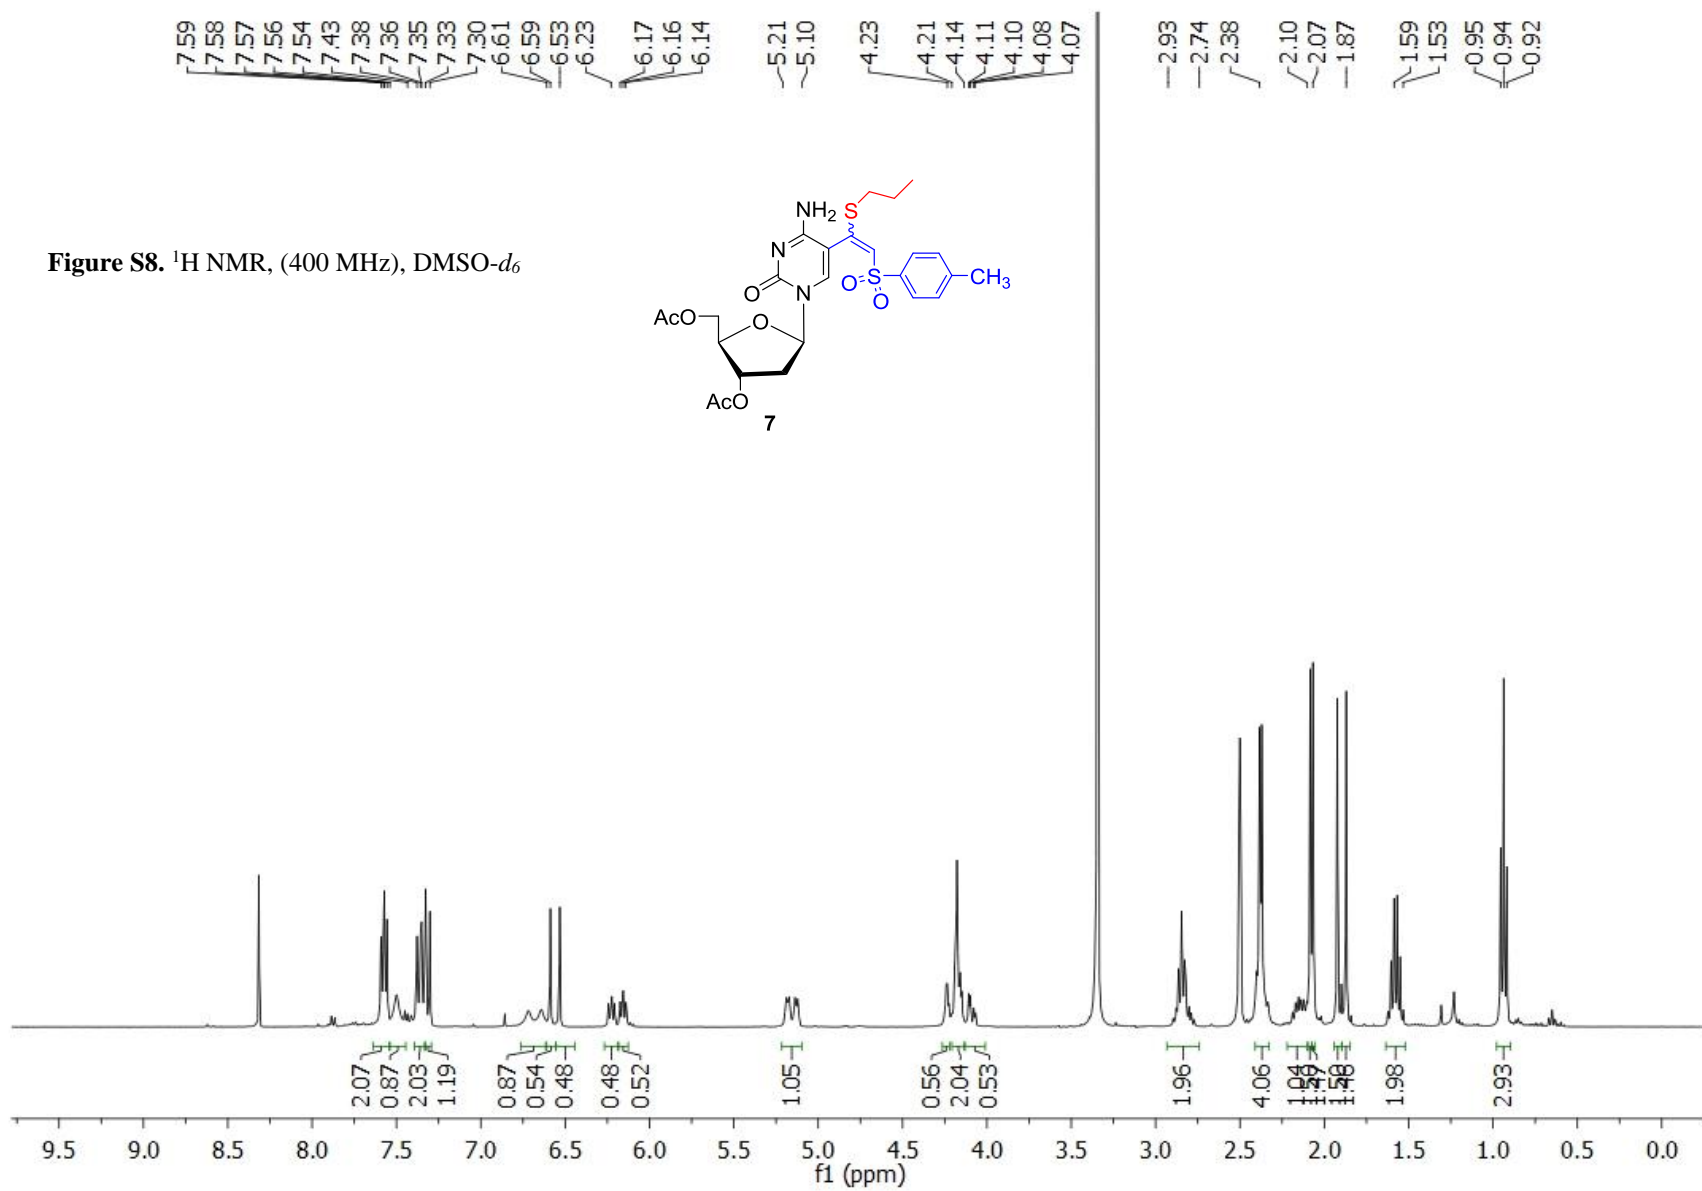

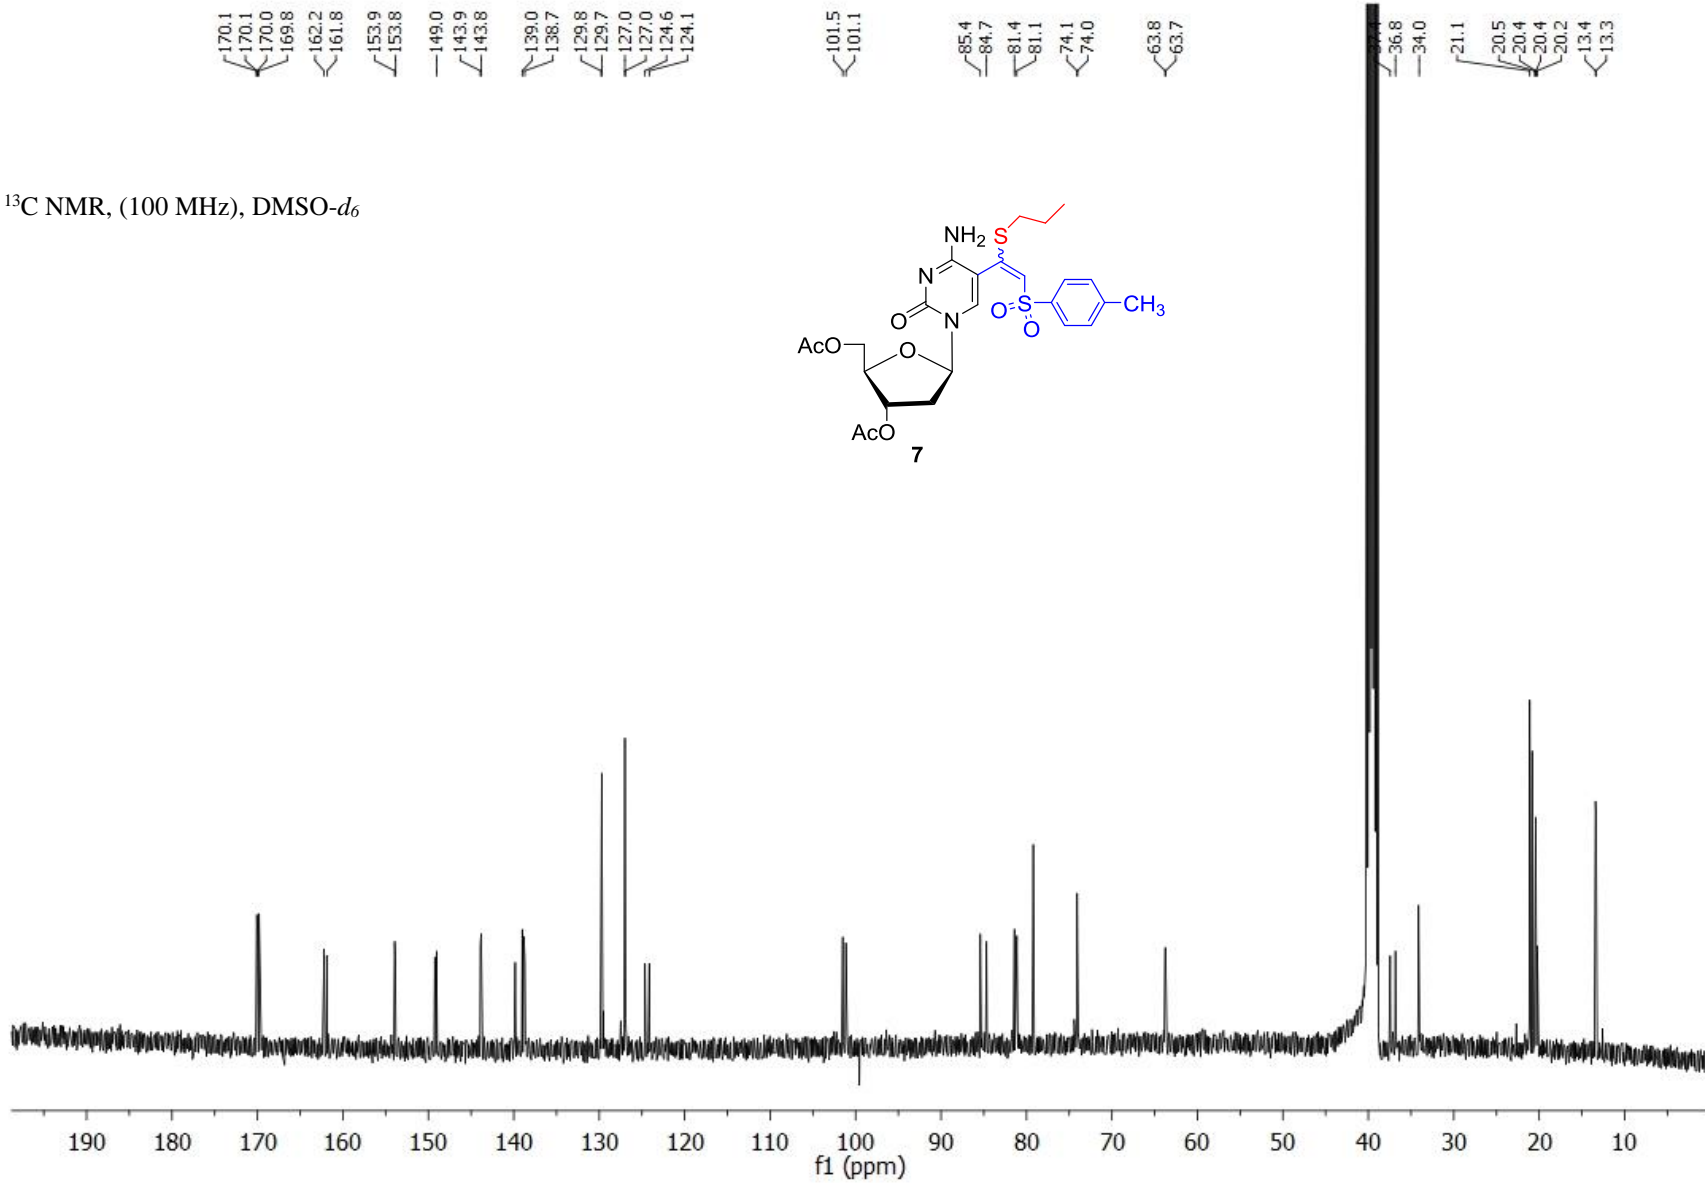

**Figure S9.** <sup>13</sup>C NMR, (100 MHz), DMSO-*d*<sub>6</sub>

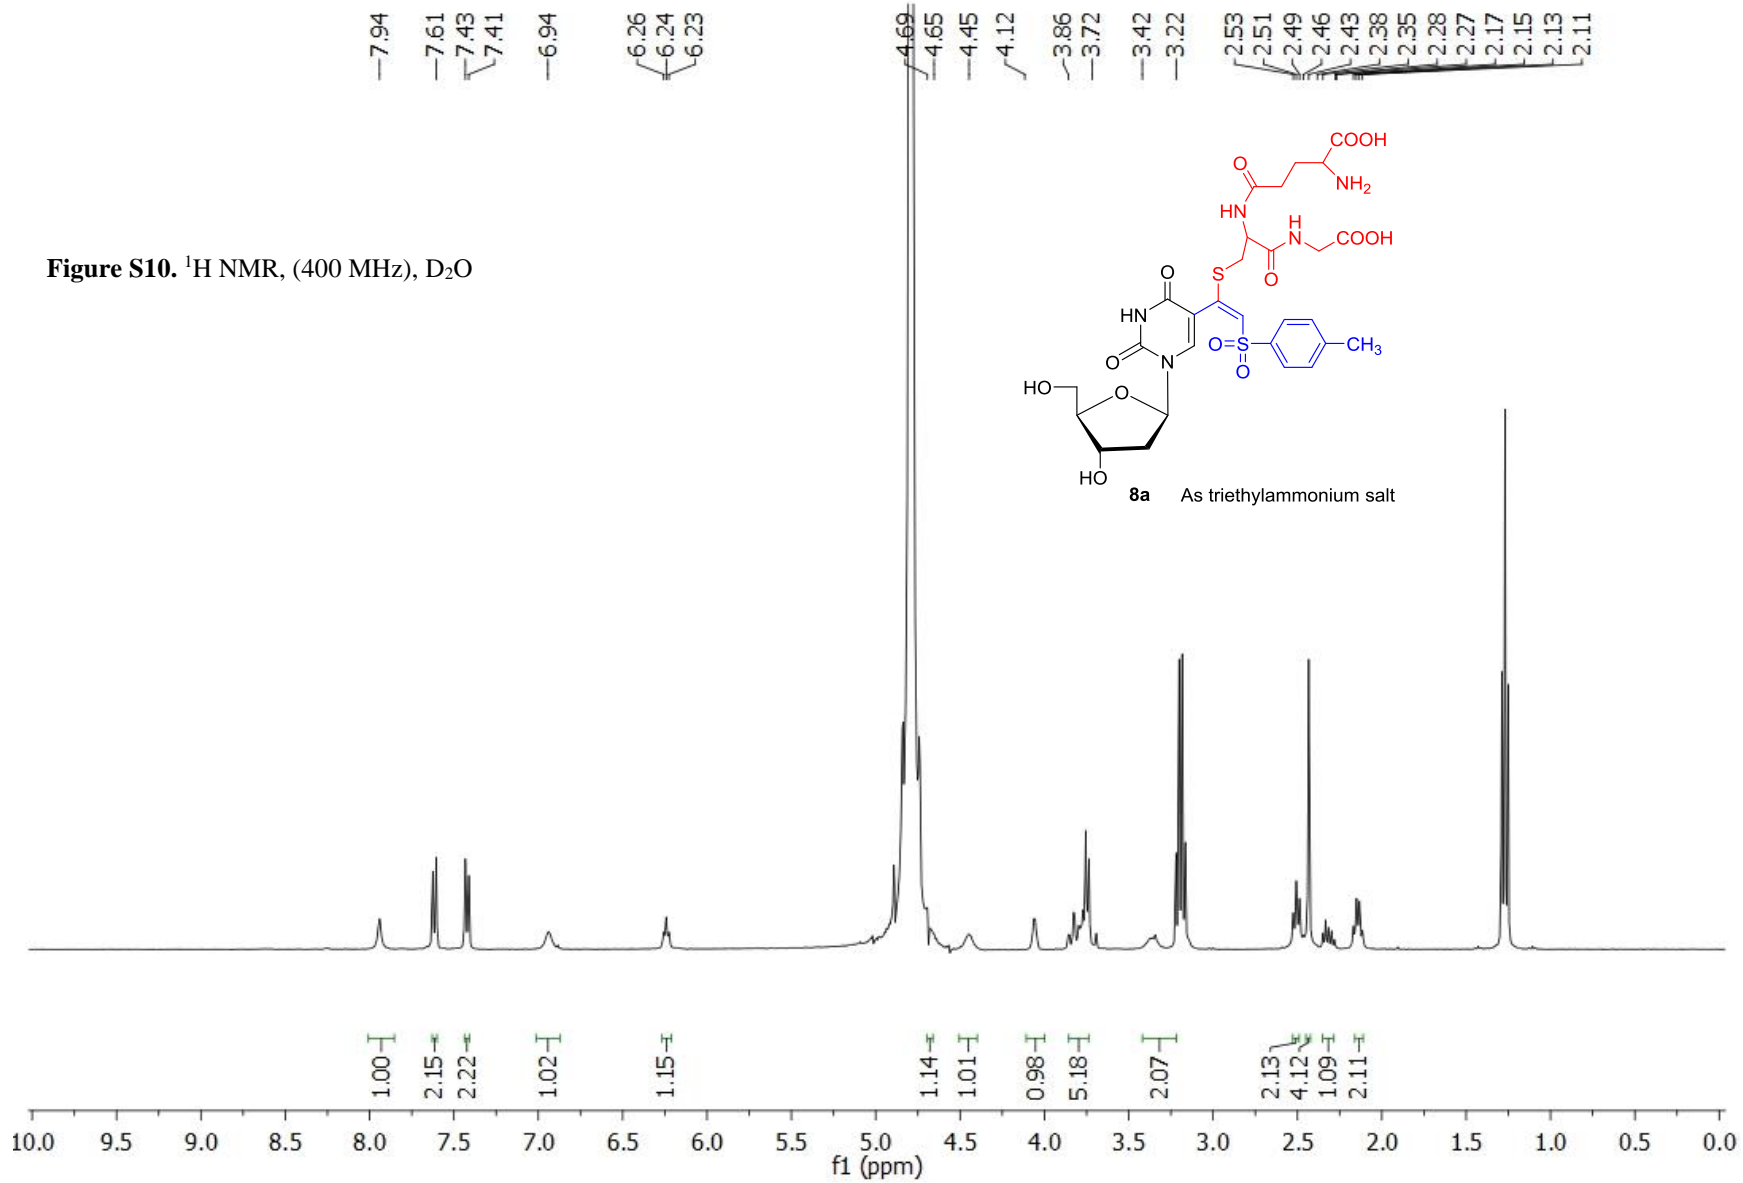

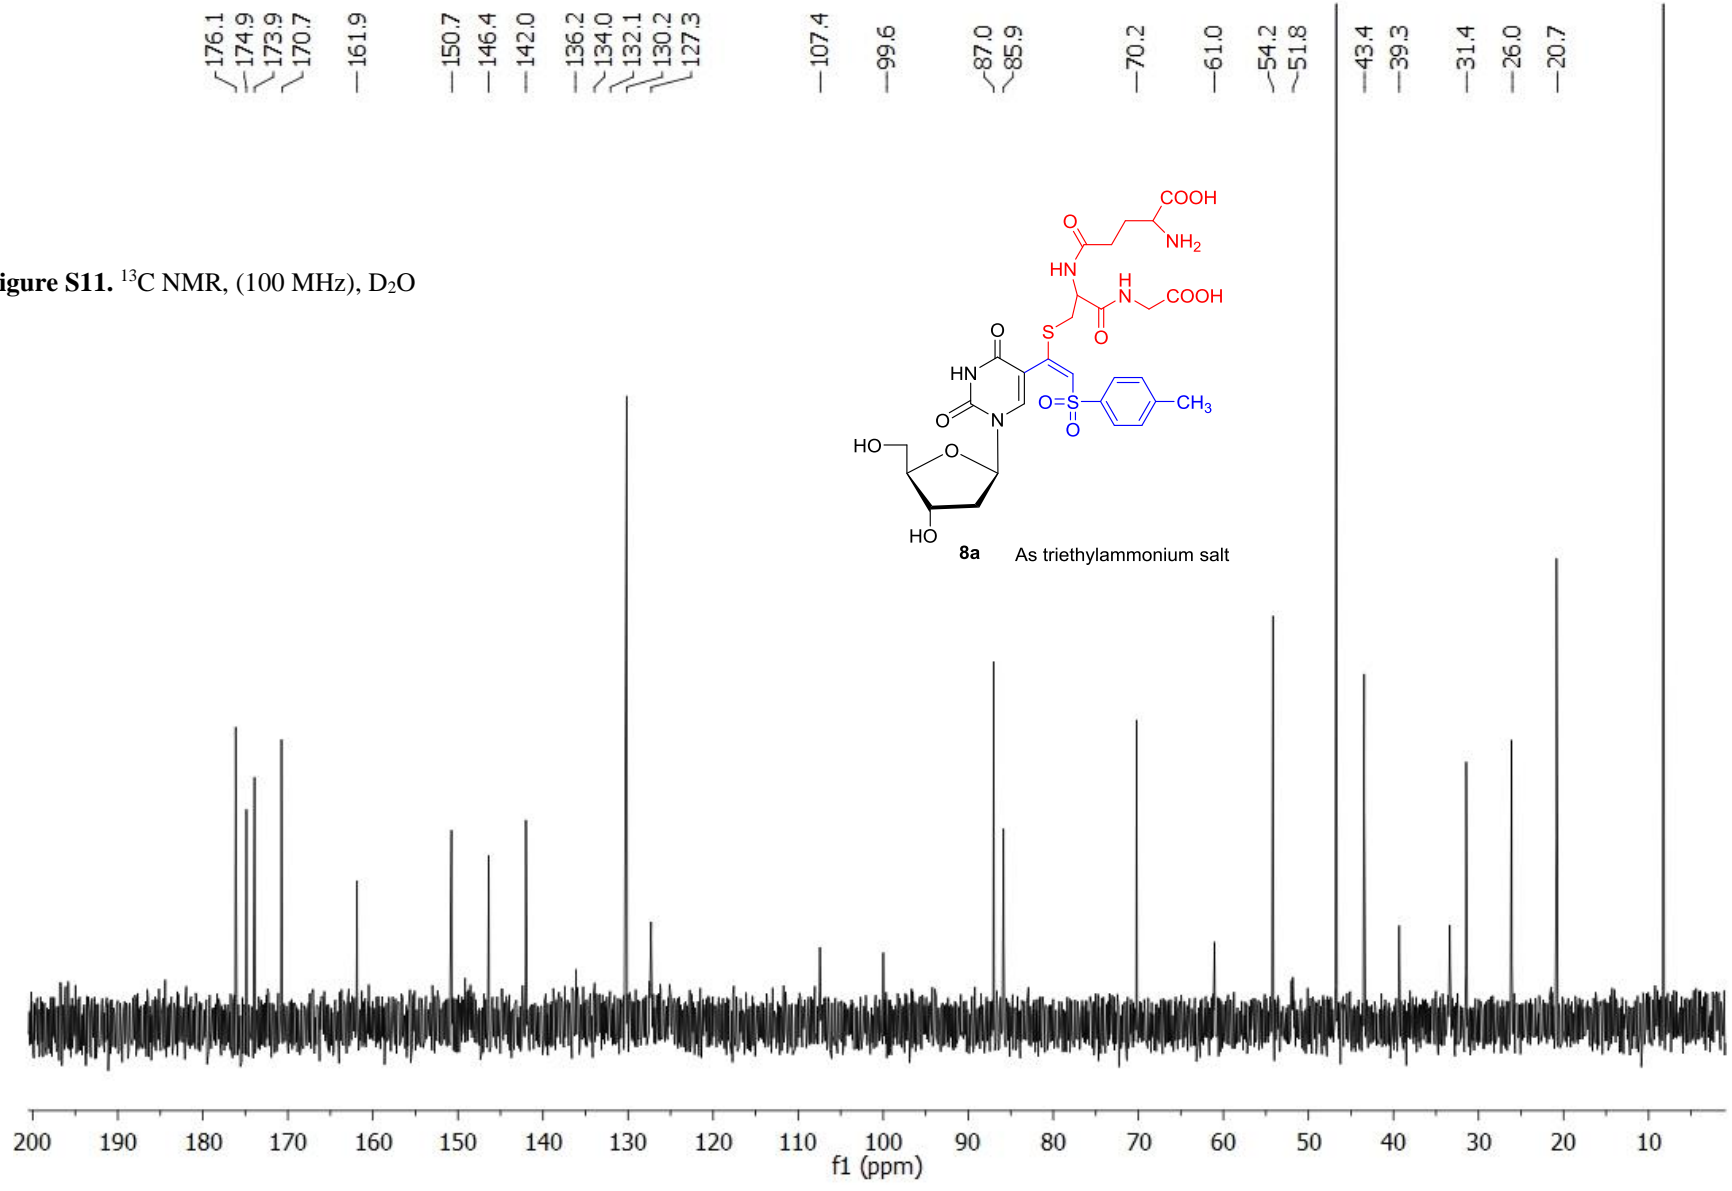

Figure S12. <sup>1</sup>H NMR, (400 MHz), D<sub>2</sub>O

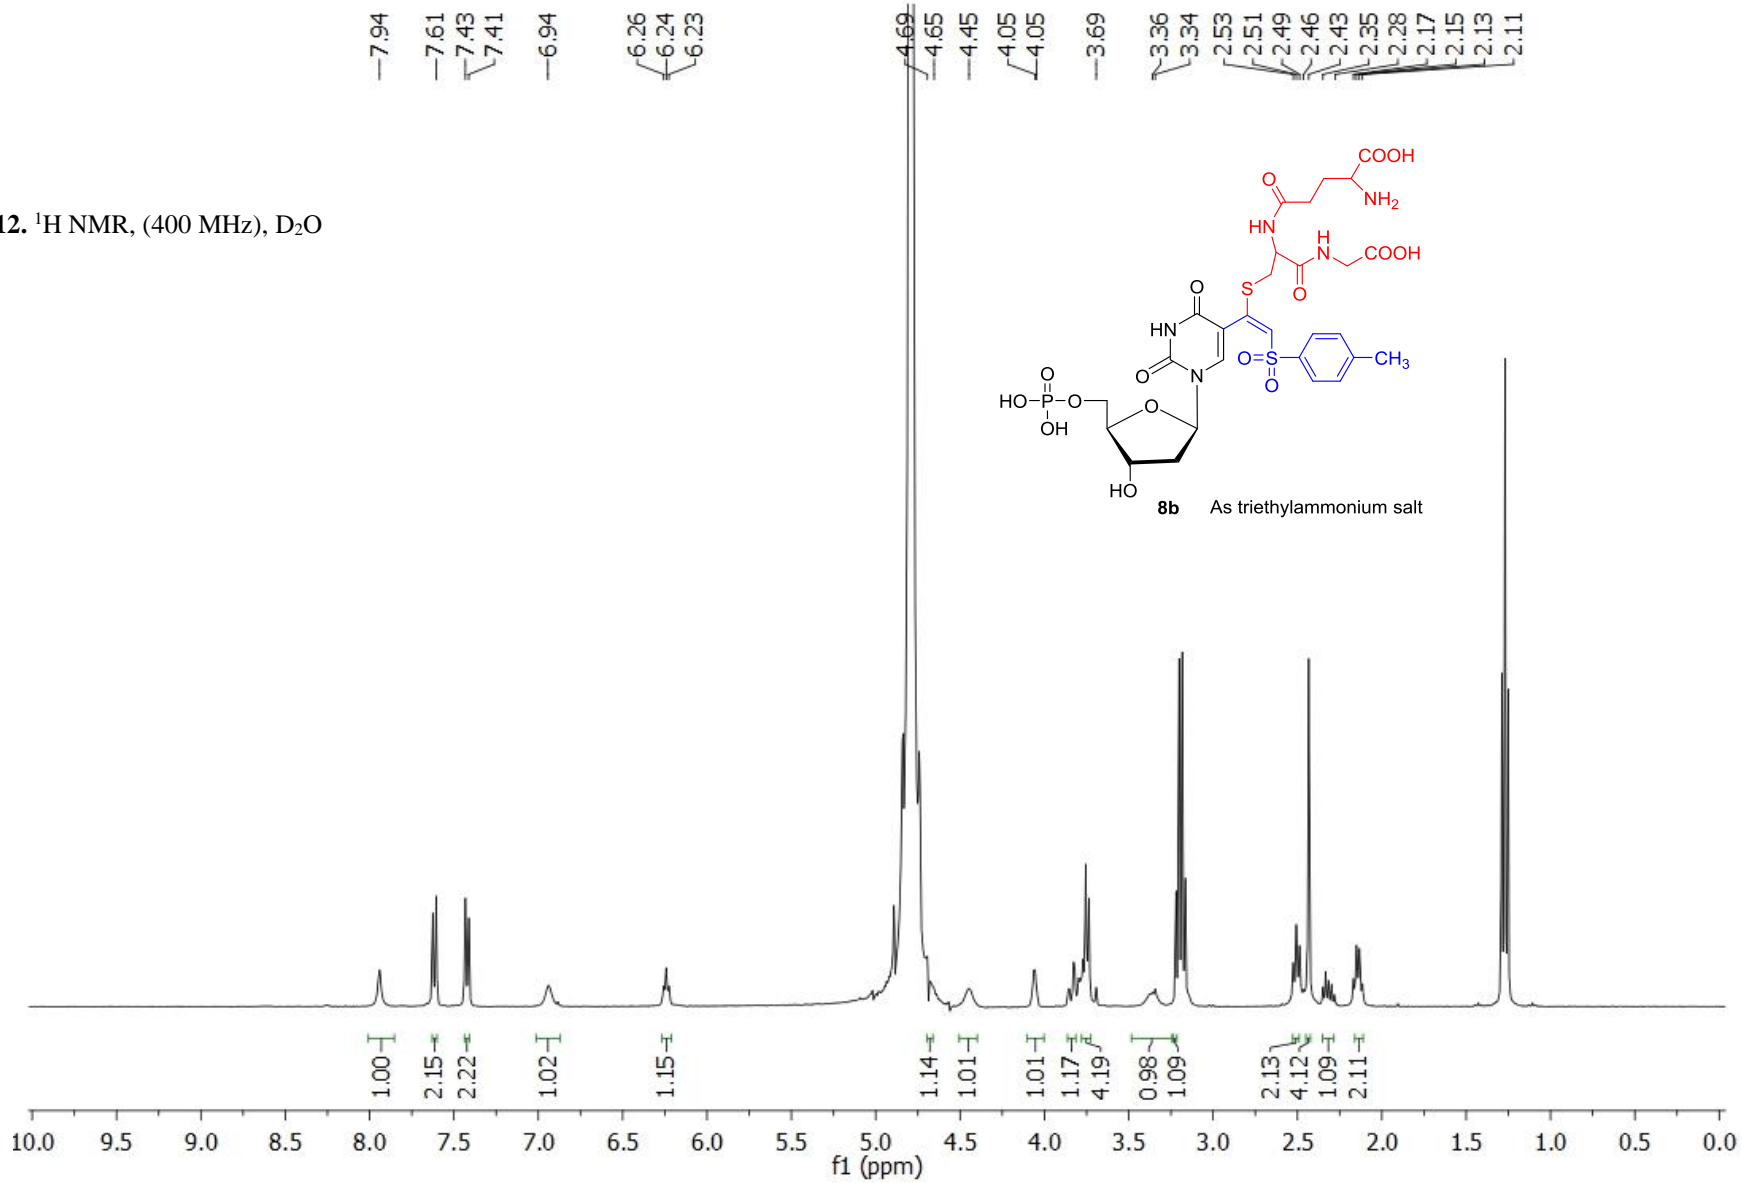

Figure S13.  $^{13}\text{C}$  NMR, (100 MHz),  $\text{D}_2\text{O}$

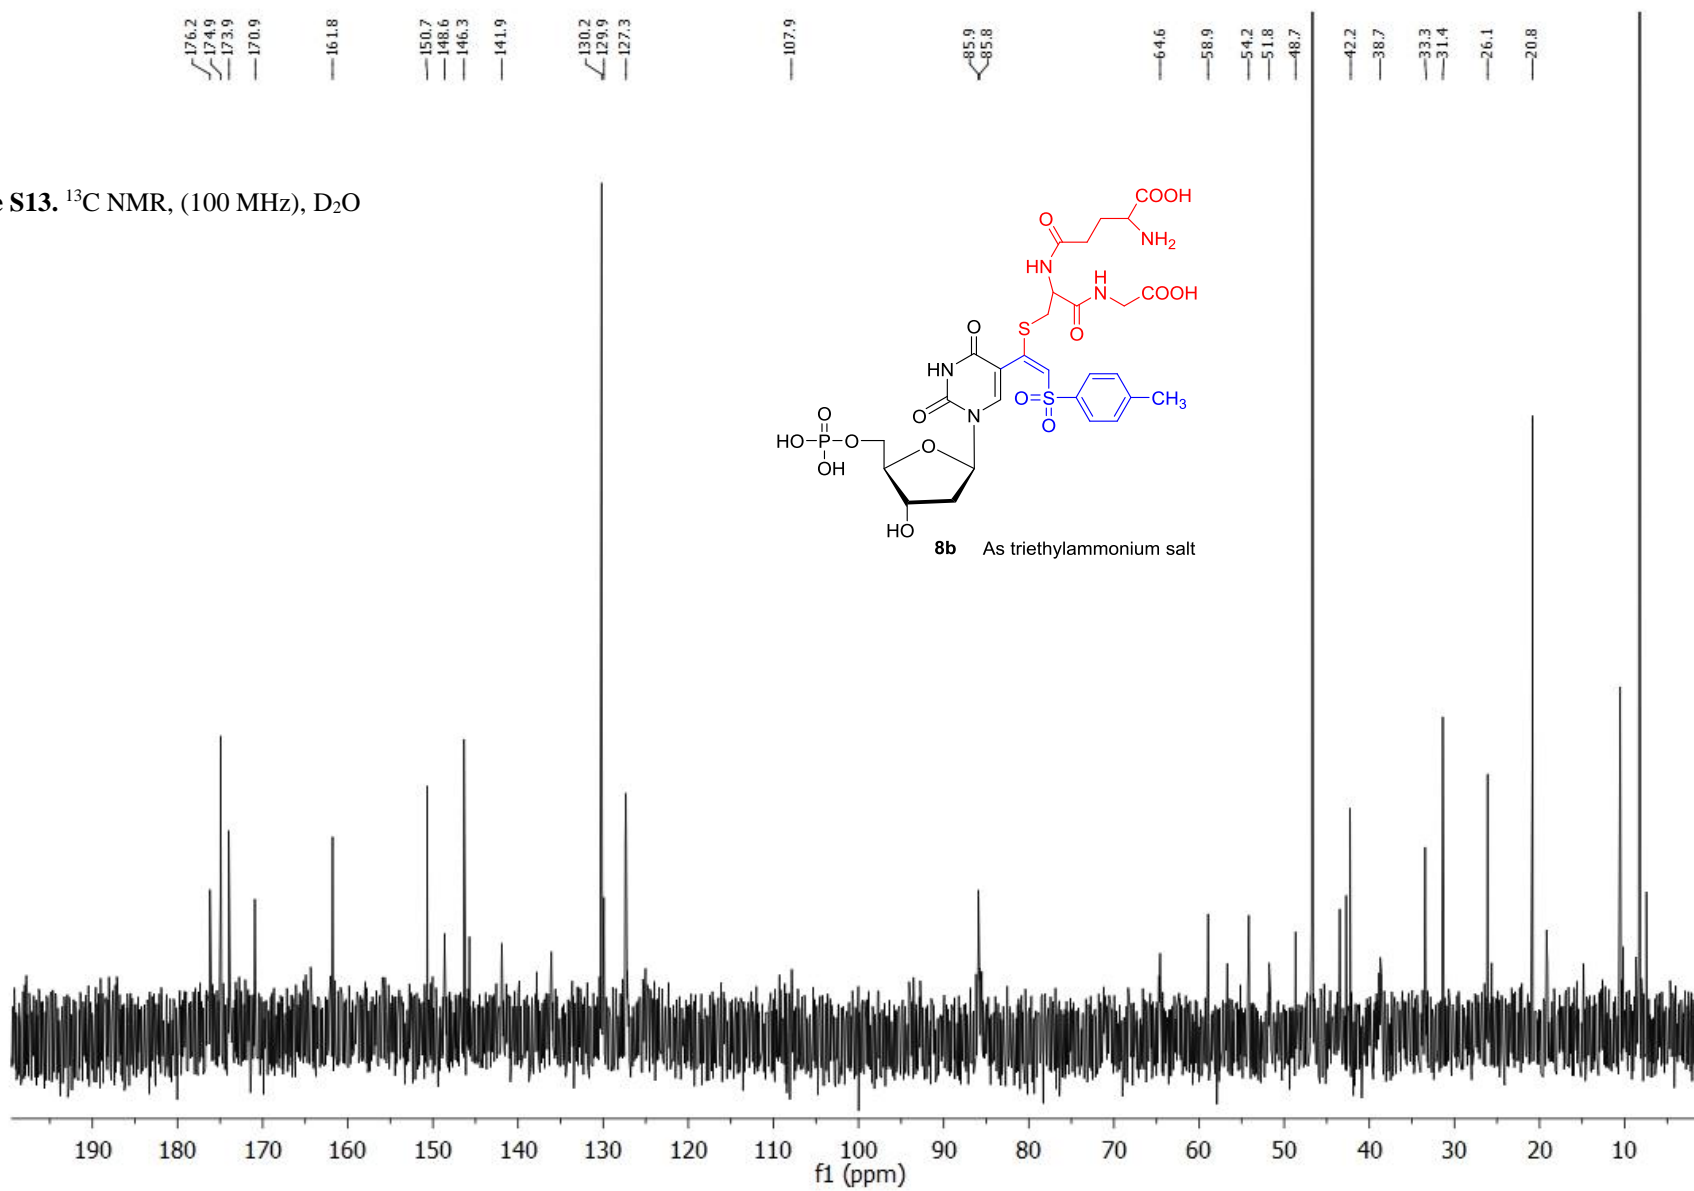

-3.77

Figure S14.  $^{31}\text{P}$  NMR, (162 MHz),  $\text{D}_2\text{O}$

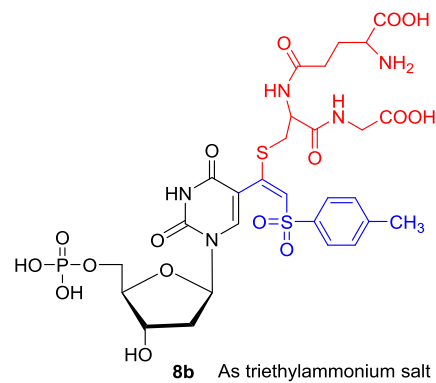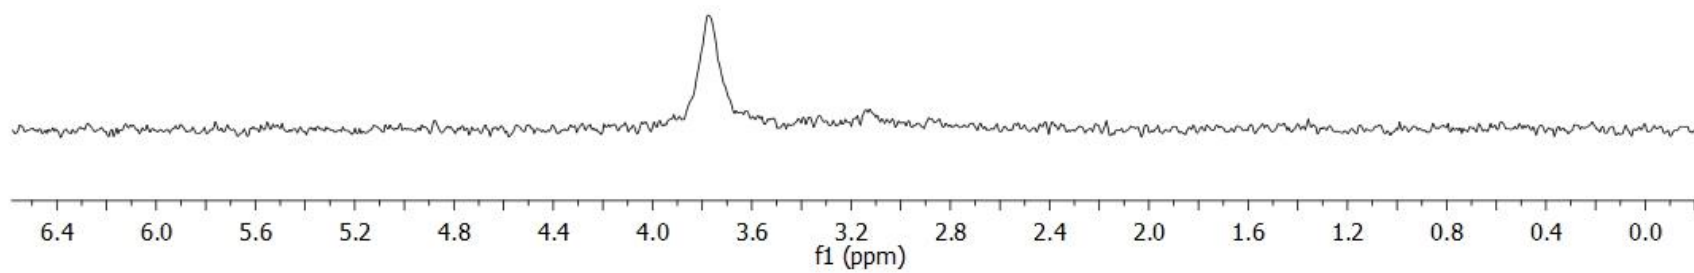

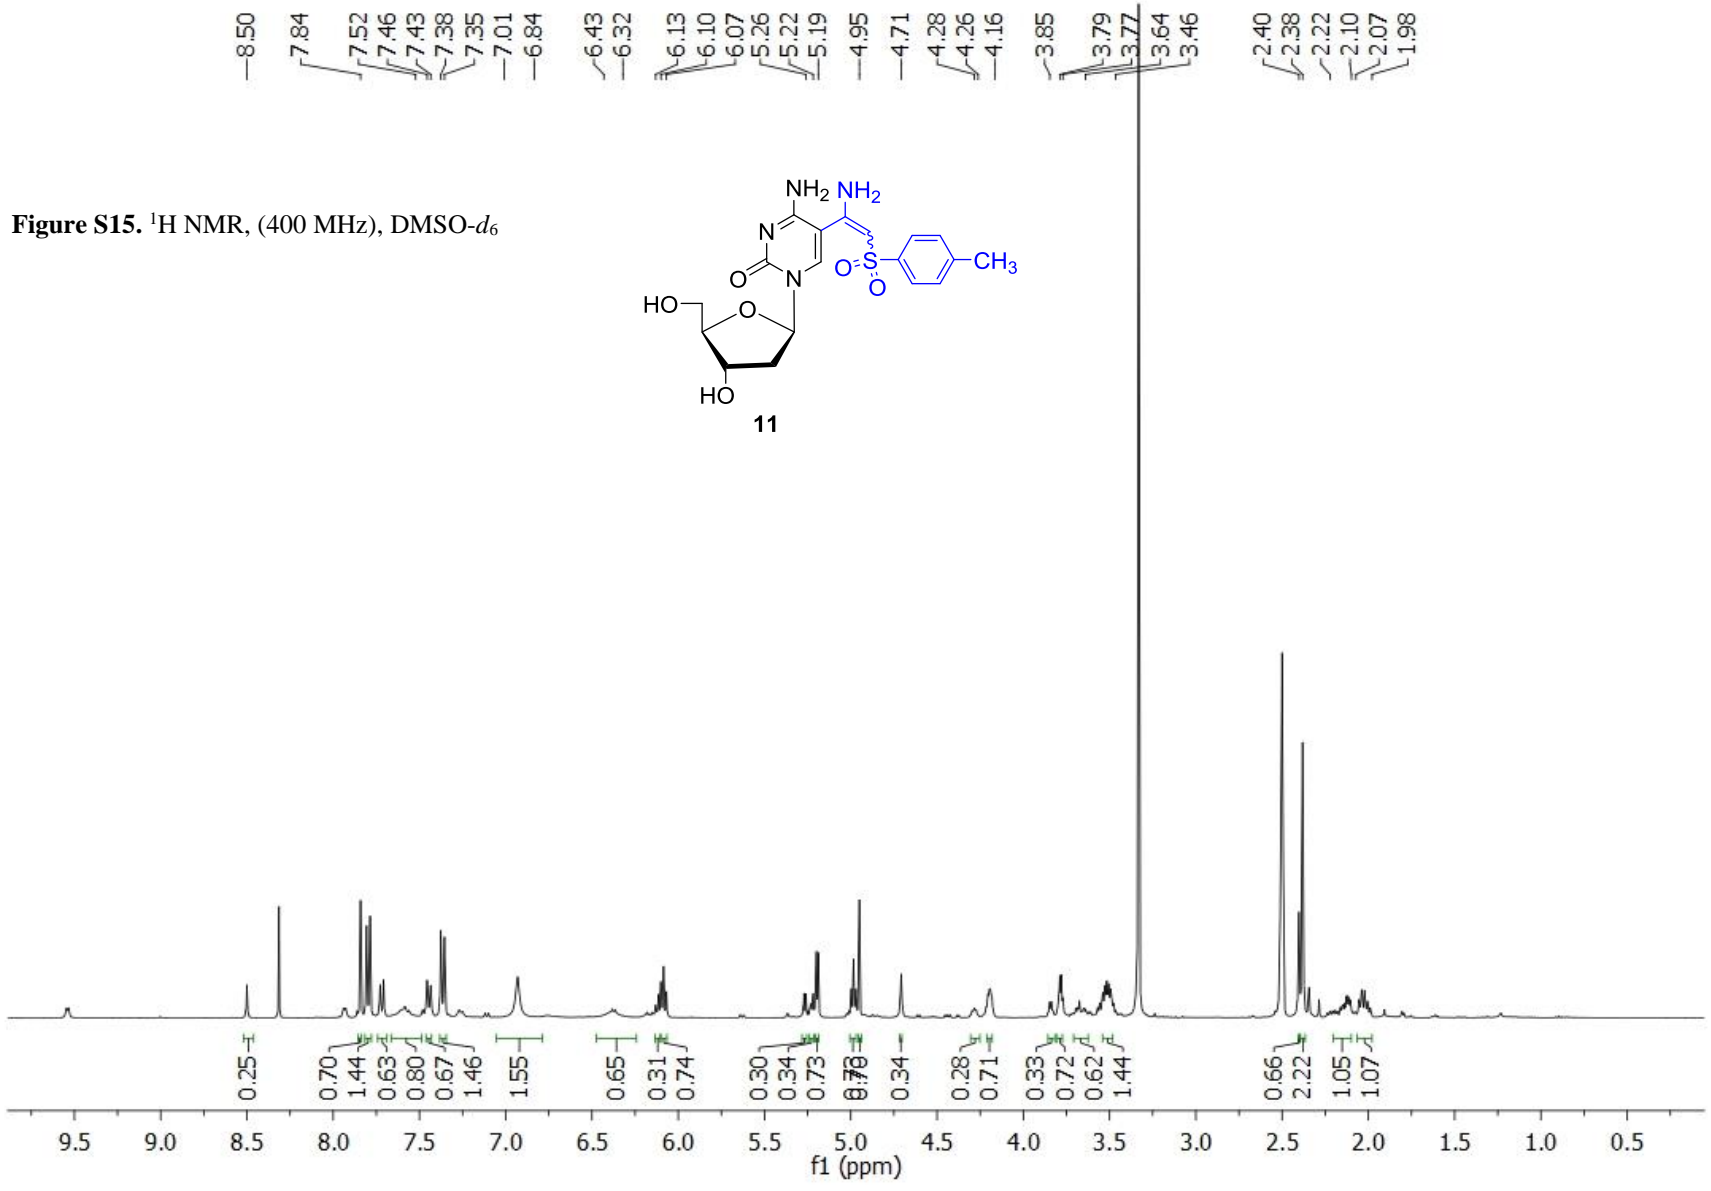



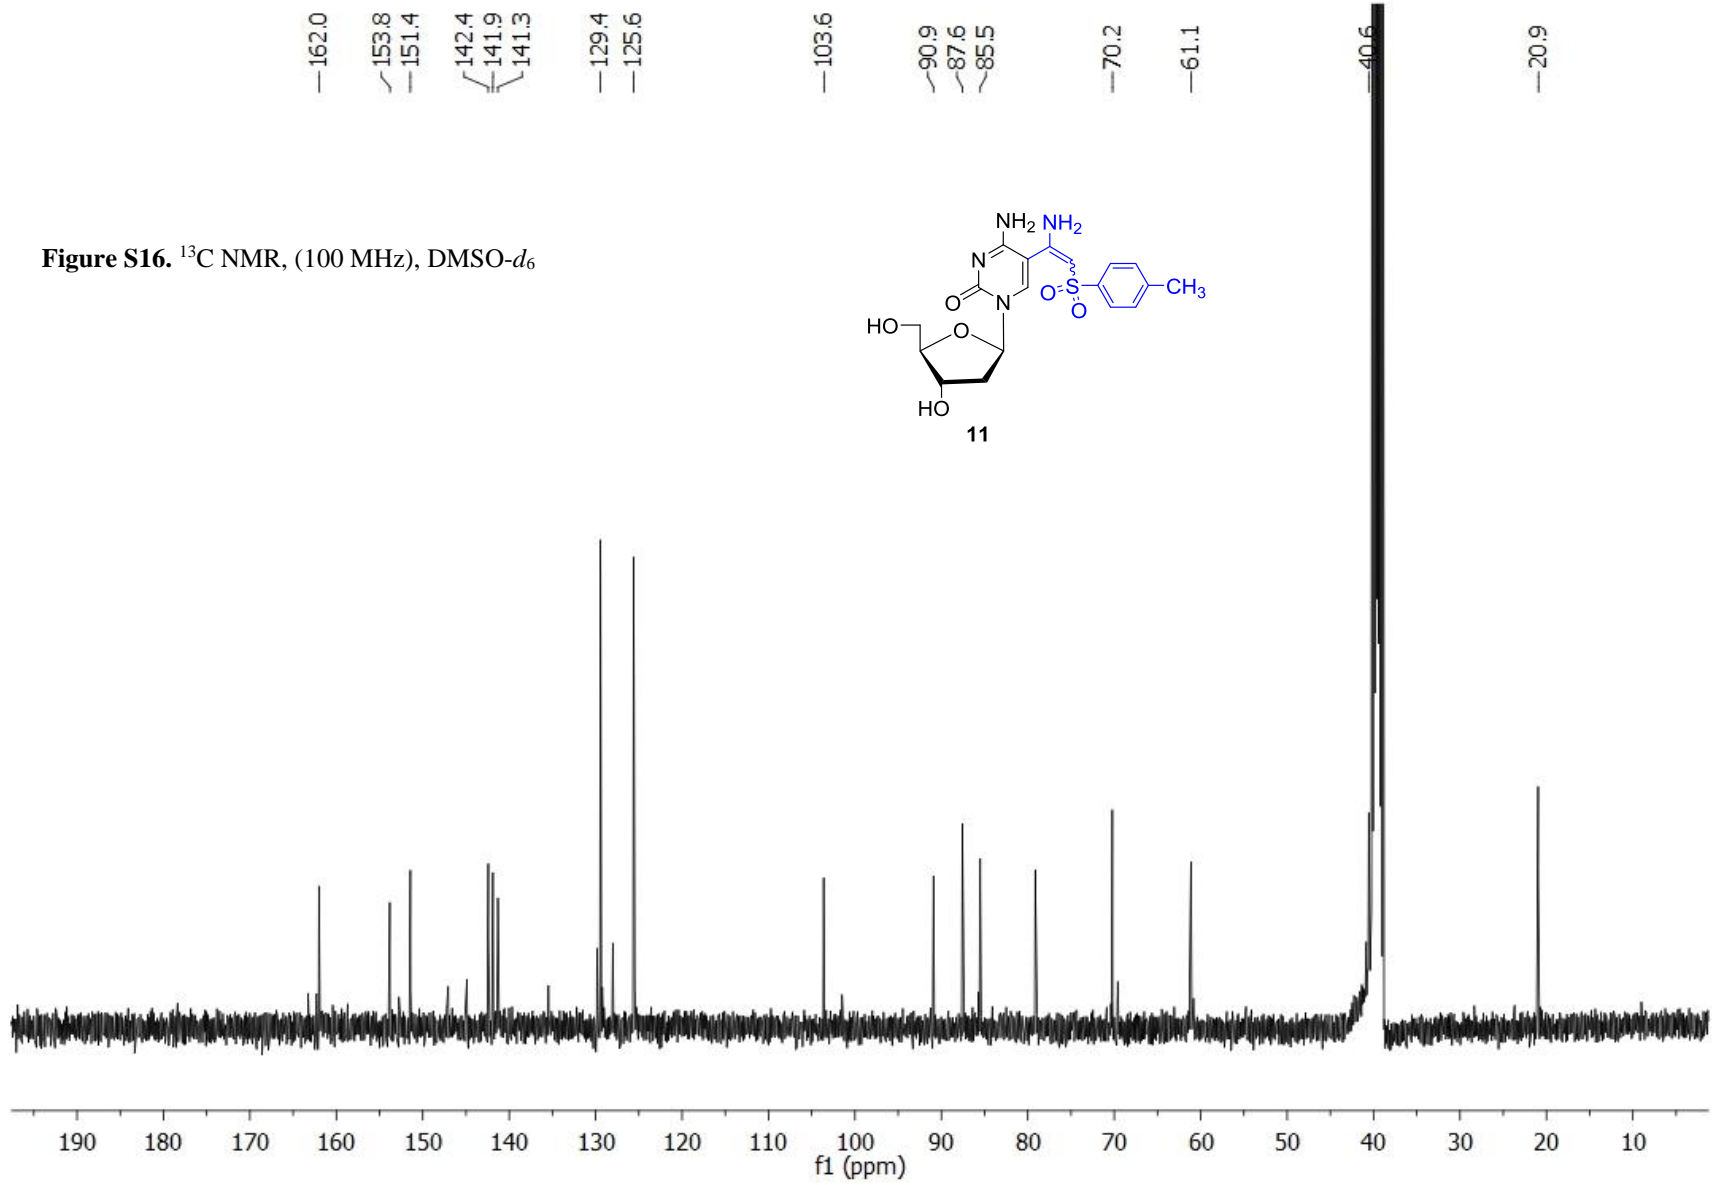

Figure S17.  $^1\text{H}$  NMR, (400 MHz),  $\text{DMSO-}d_6$

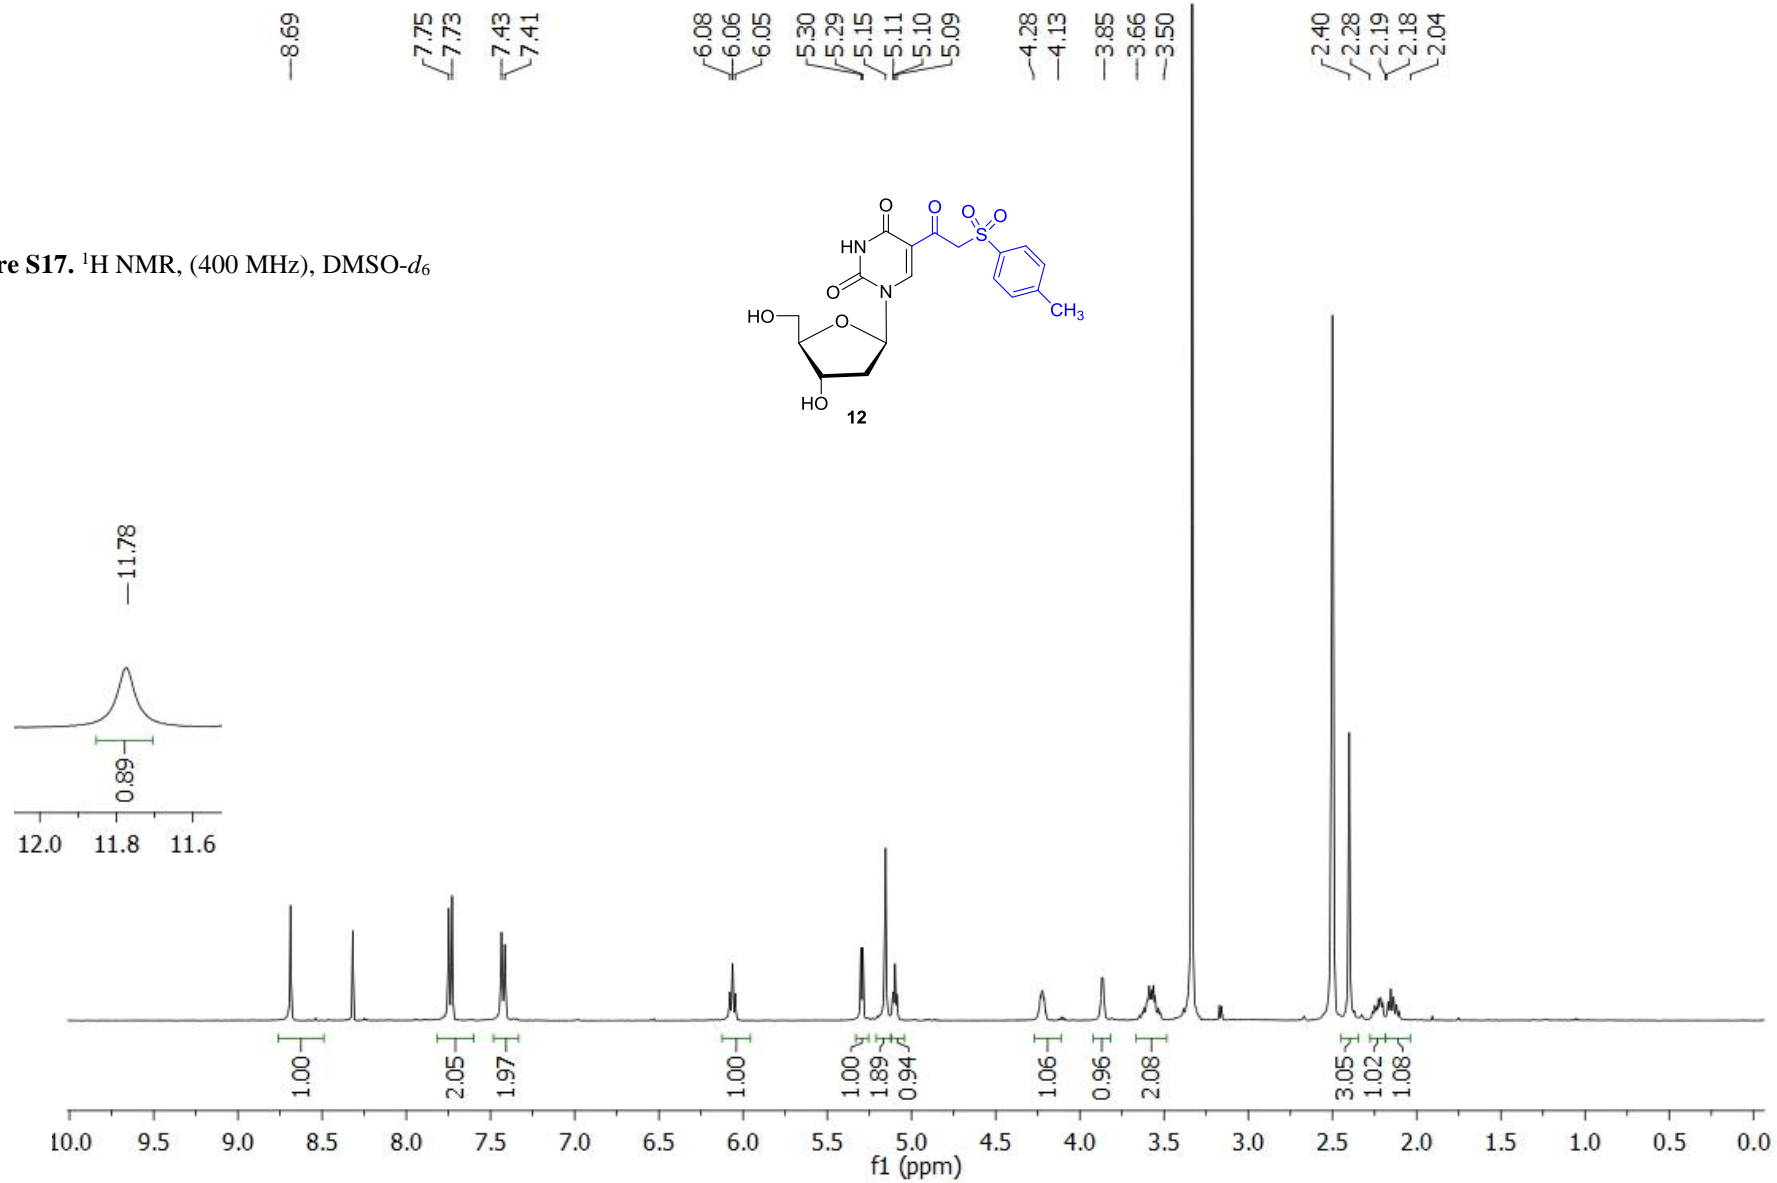

Figure S18.  $^{13}\text{C}$  NMR, (100 MHz),  $\text{DMSO-}d_6$

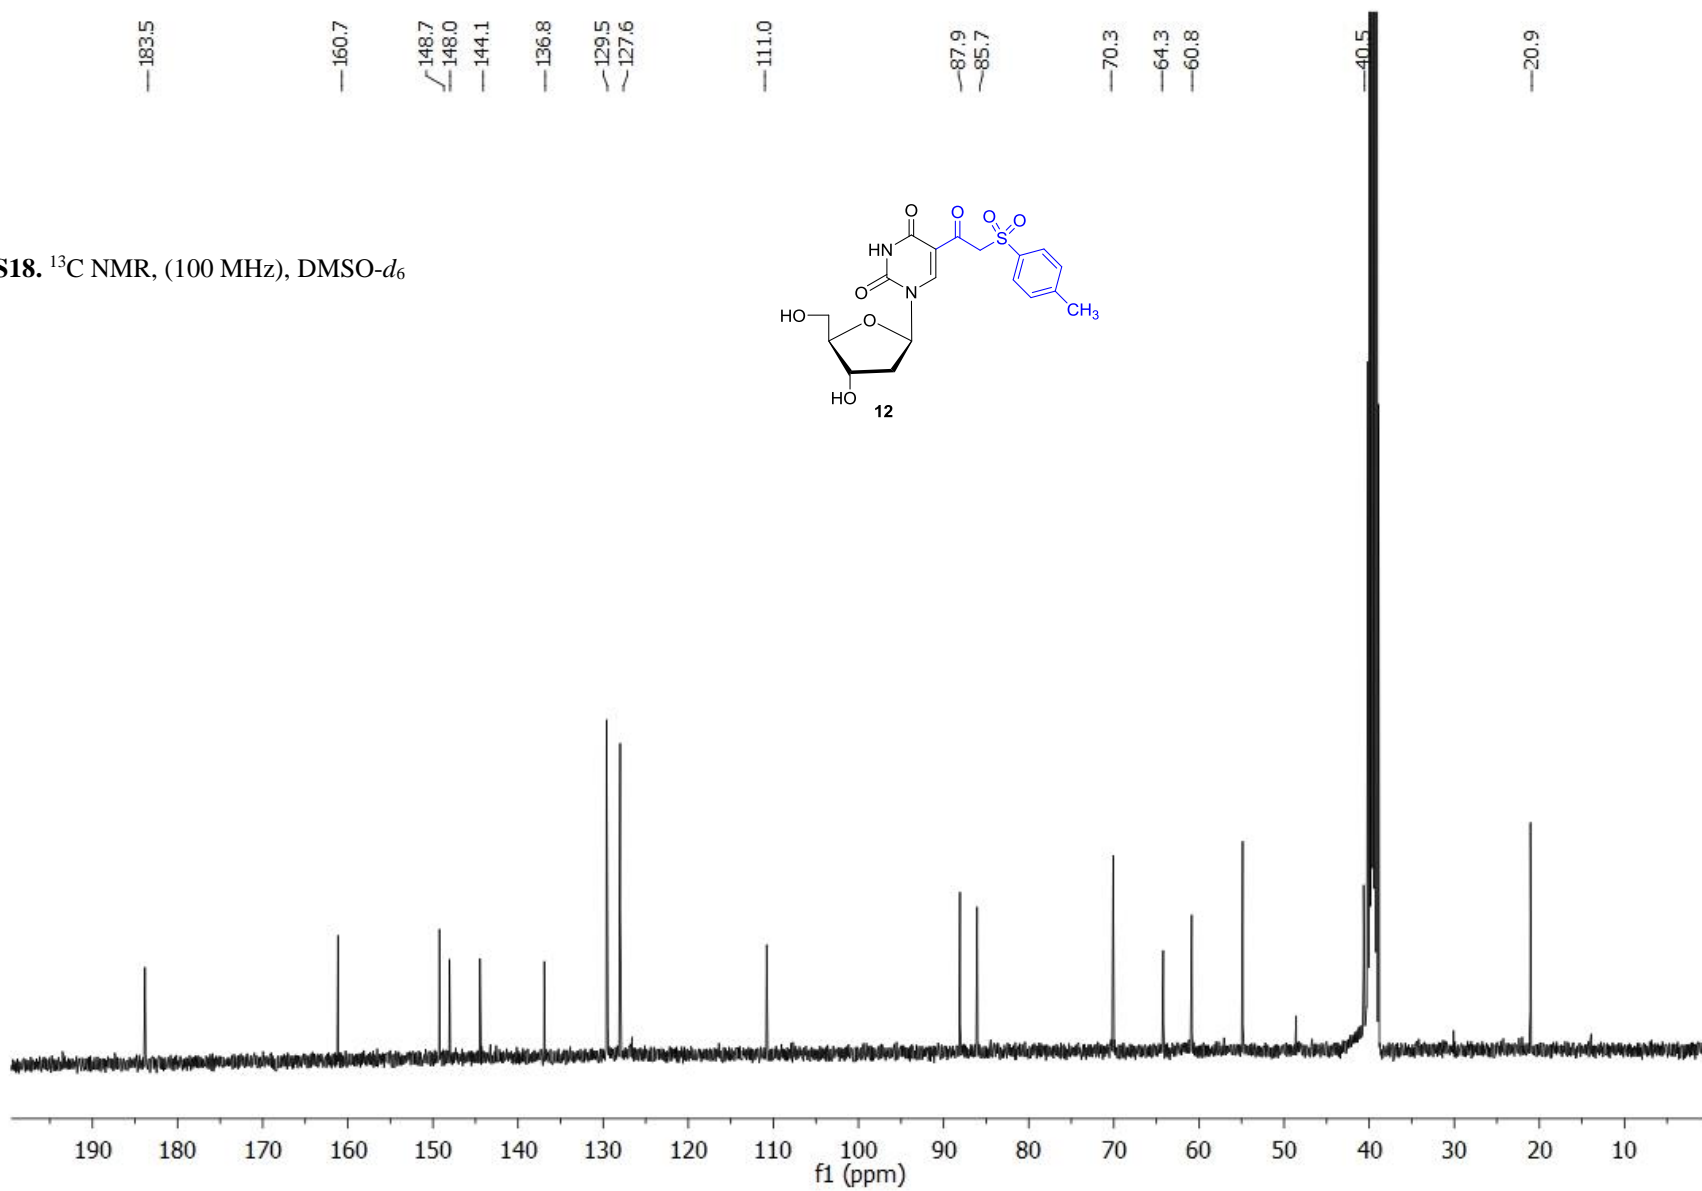

Figure S19. <sup>1</sup>H NMR, (400 MHz), DMSO-*d*<sub>6</sub>

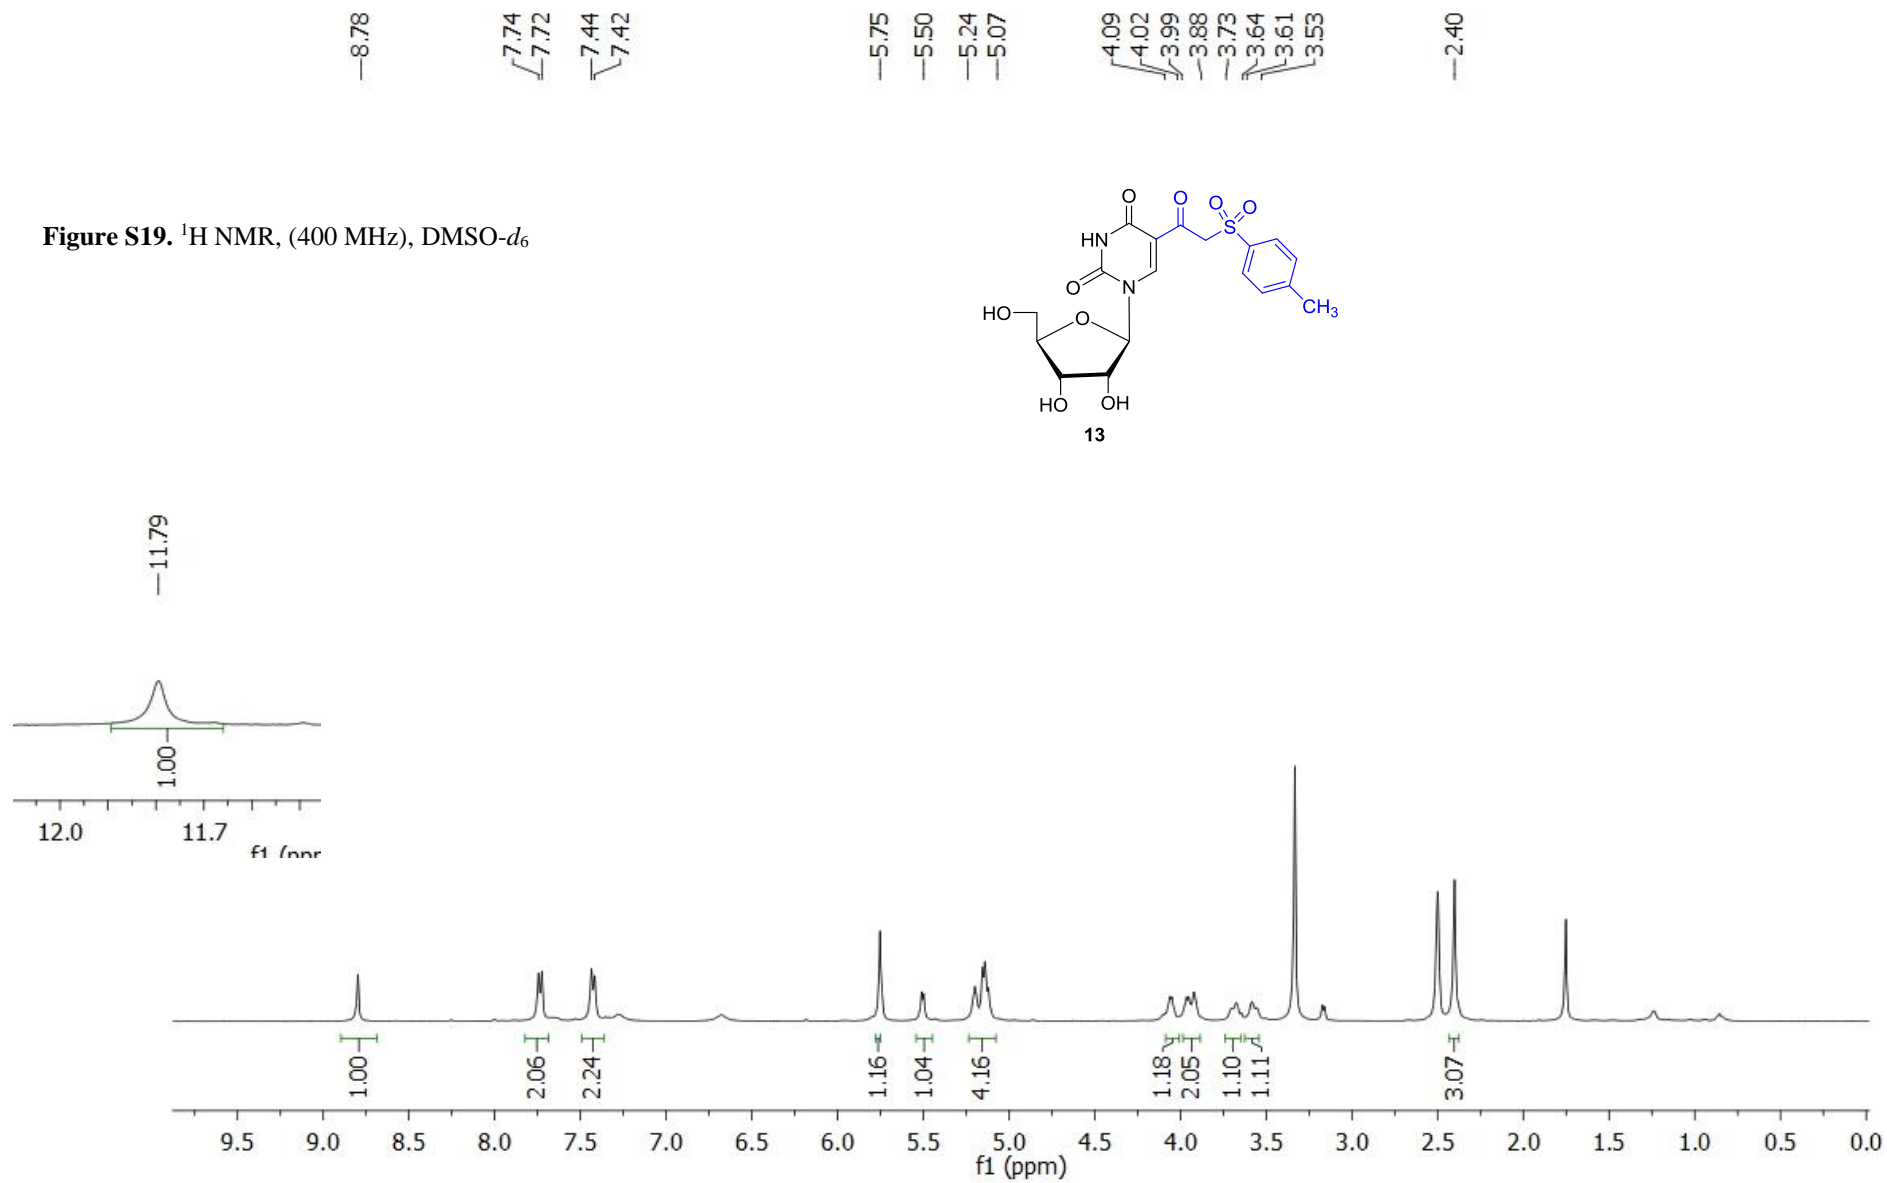

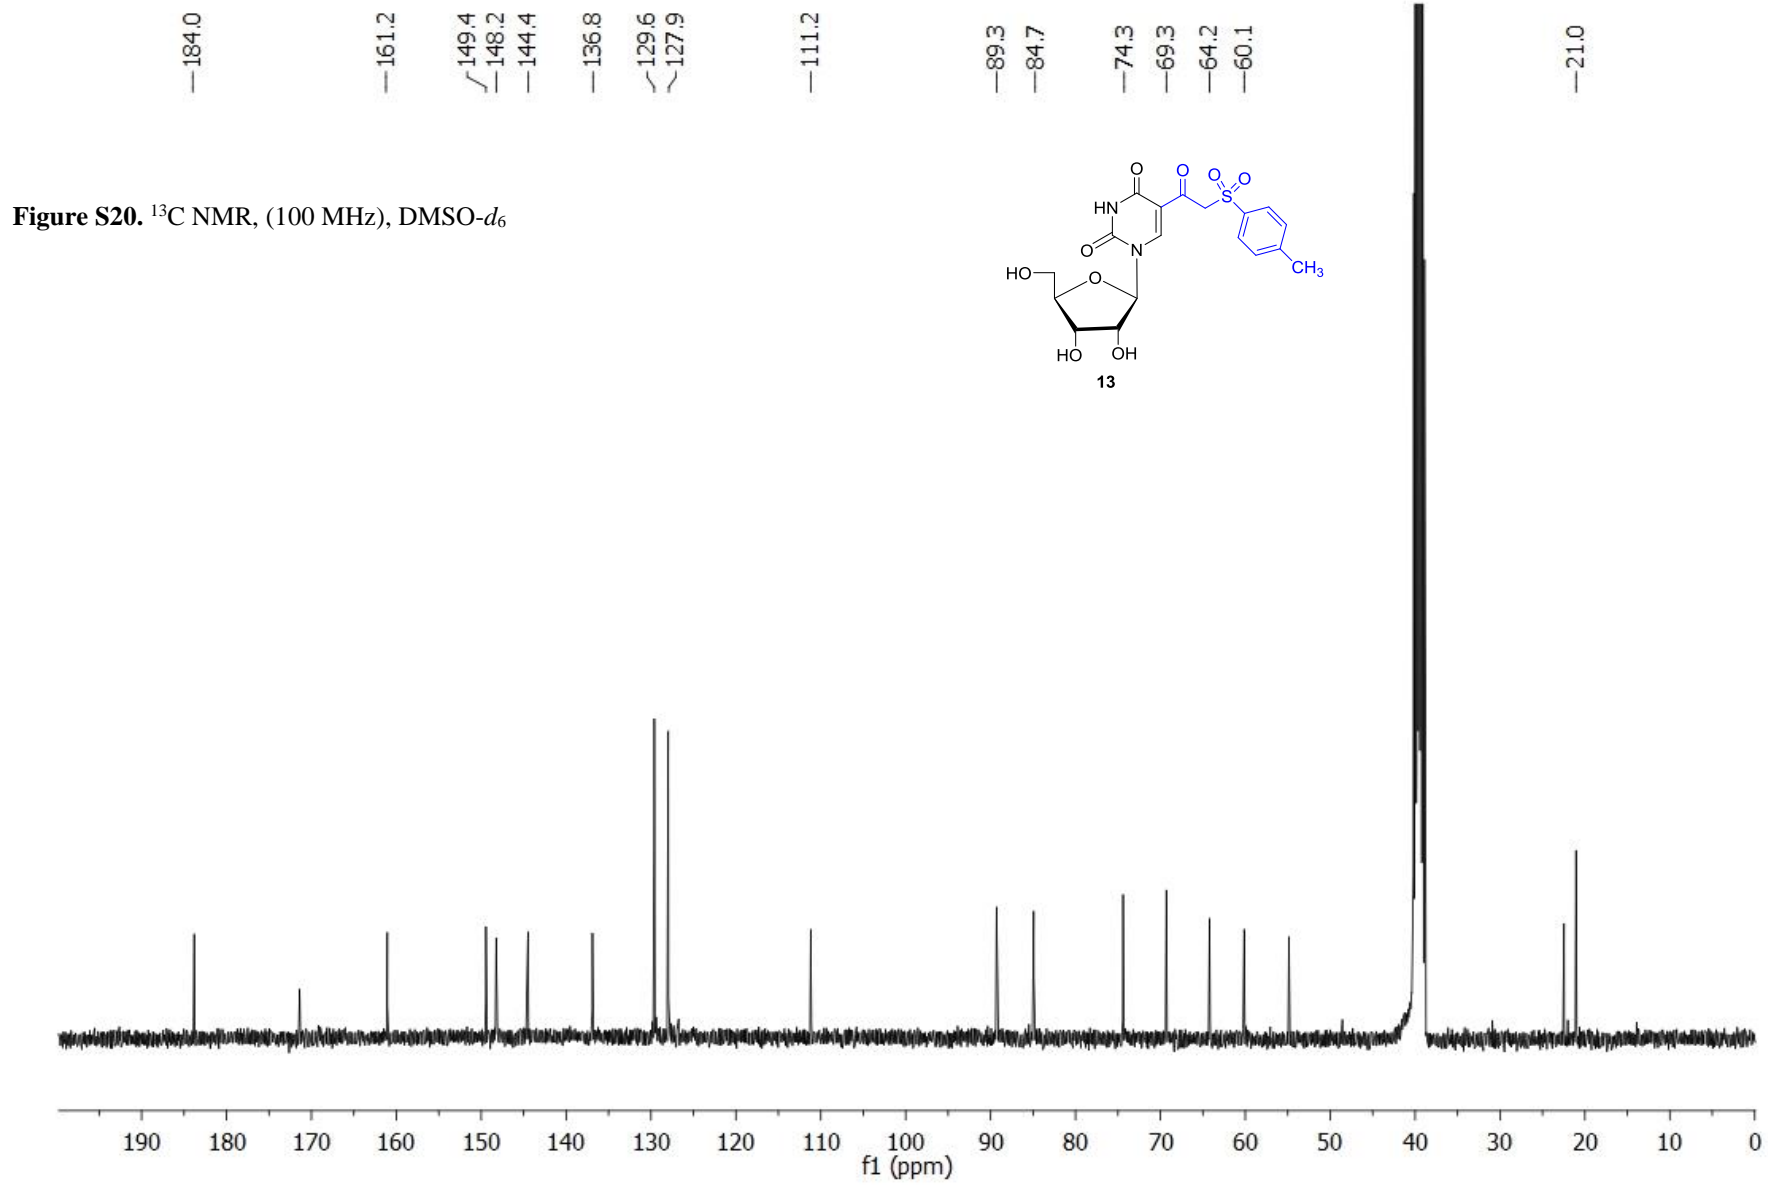

Figure S21. <sup>1</sup>H NMR, (400 MHz), DMSO-d<sub>6</sub>

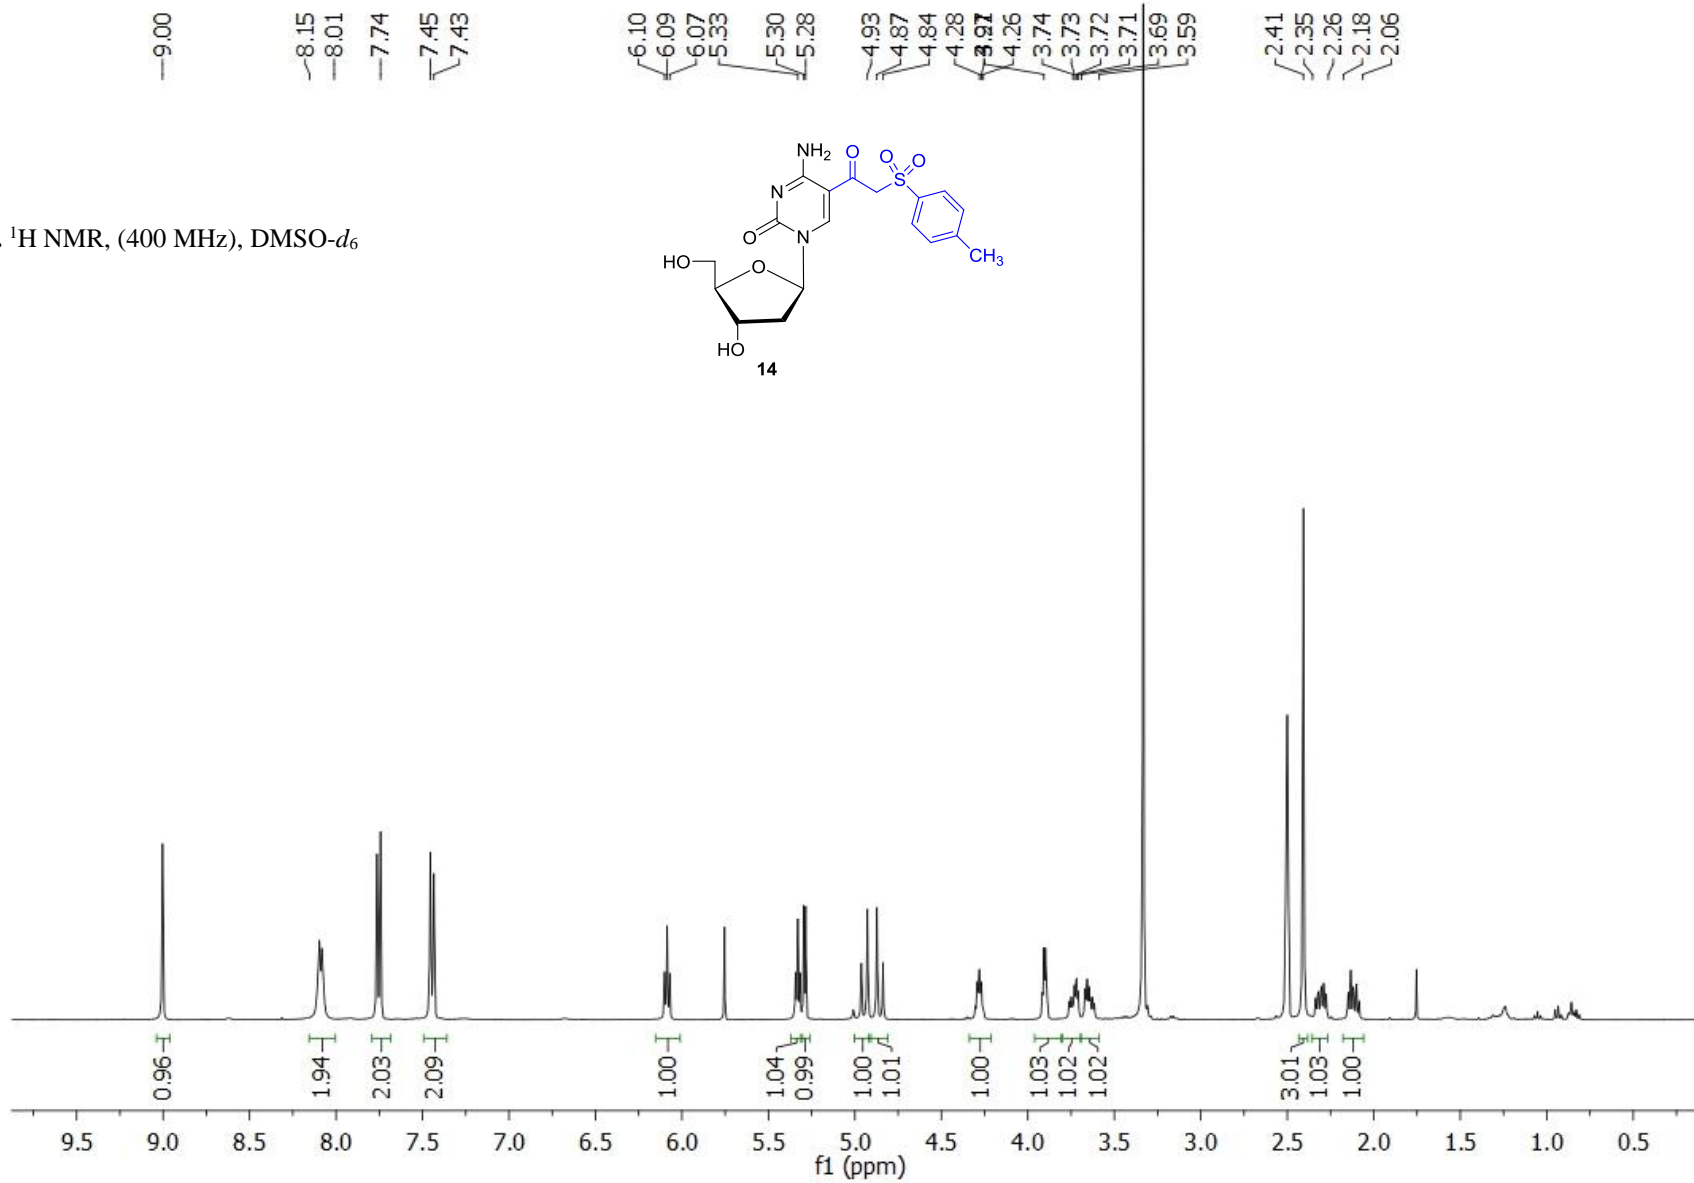

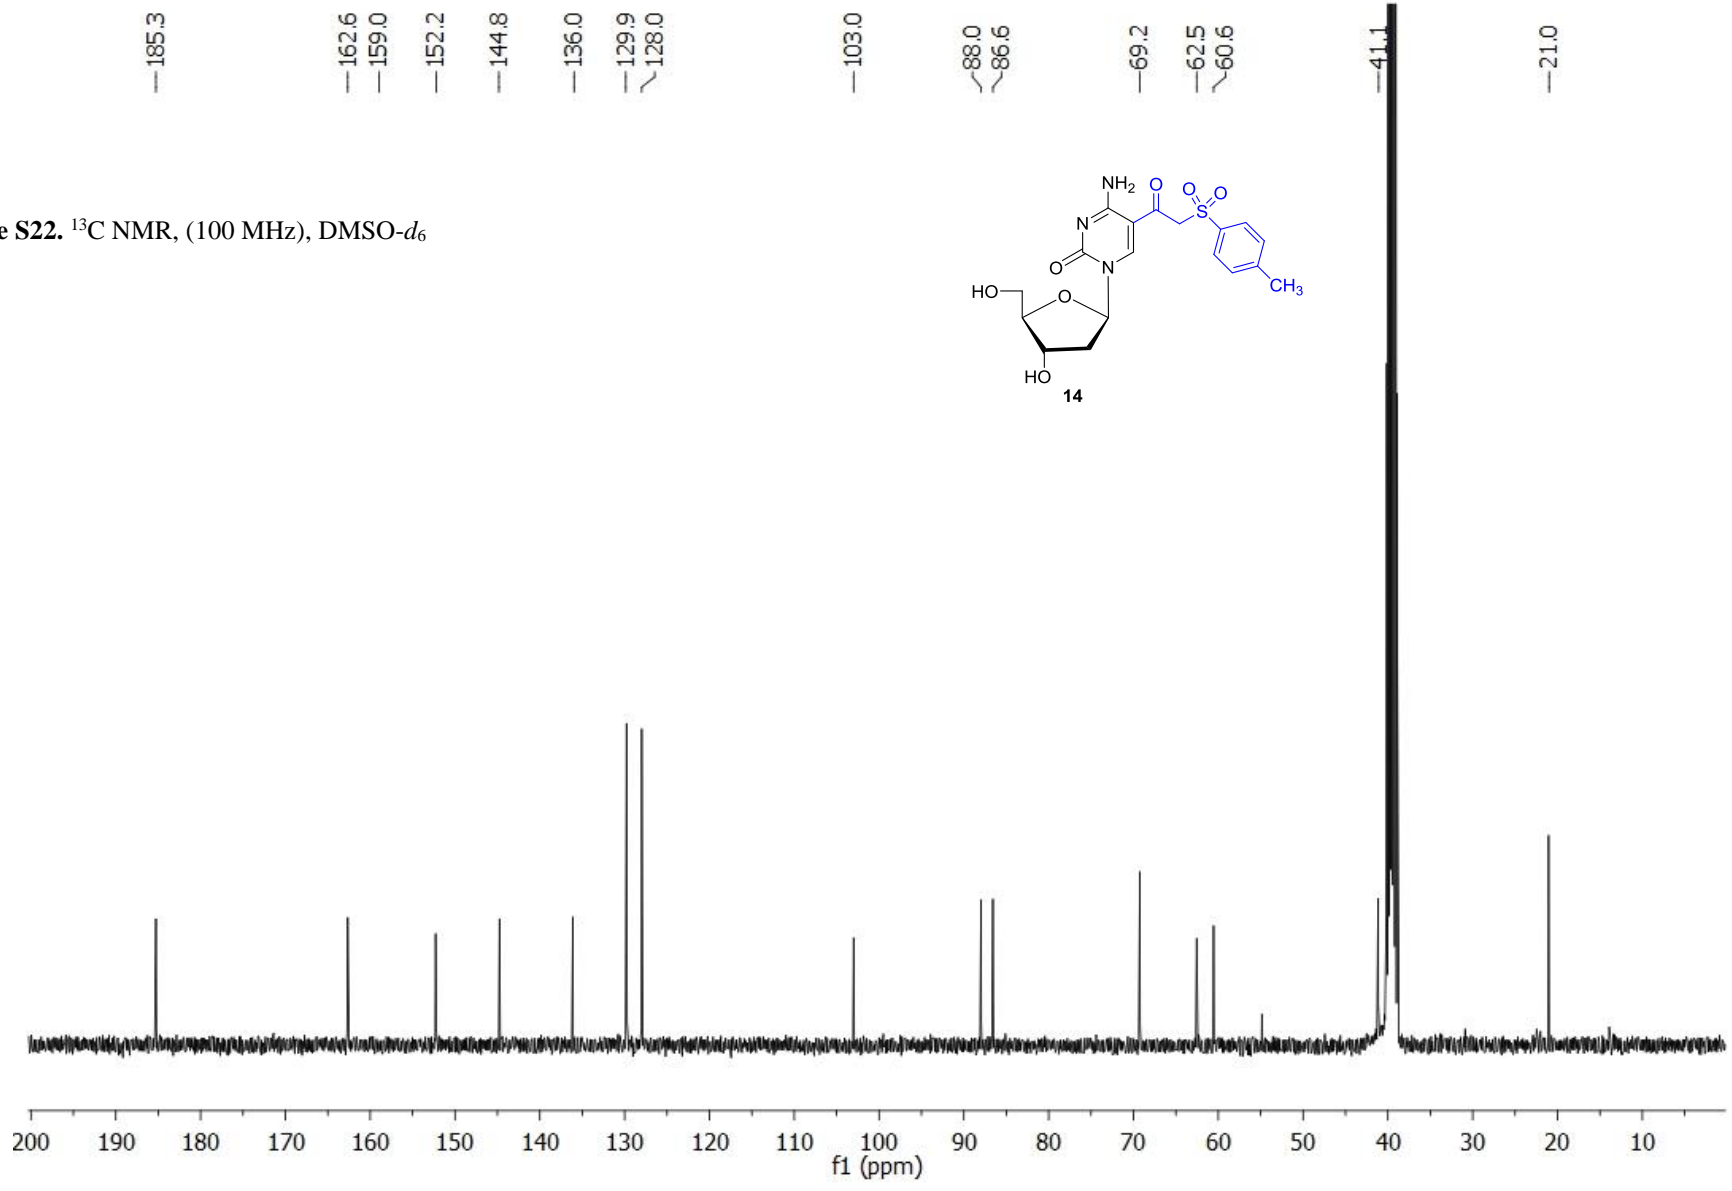

Figure S22. <sup>13</sup>C NMR, (100 MHz), DMSO-*d*<sub>6</sub>

Figure S23. <sup>1</sup>H NMR, (400 MHz), DMSO-*d*<sub>6</sub>

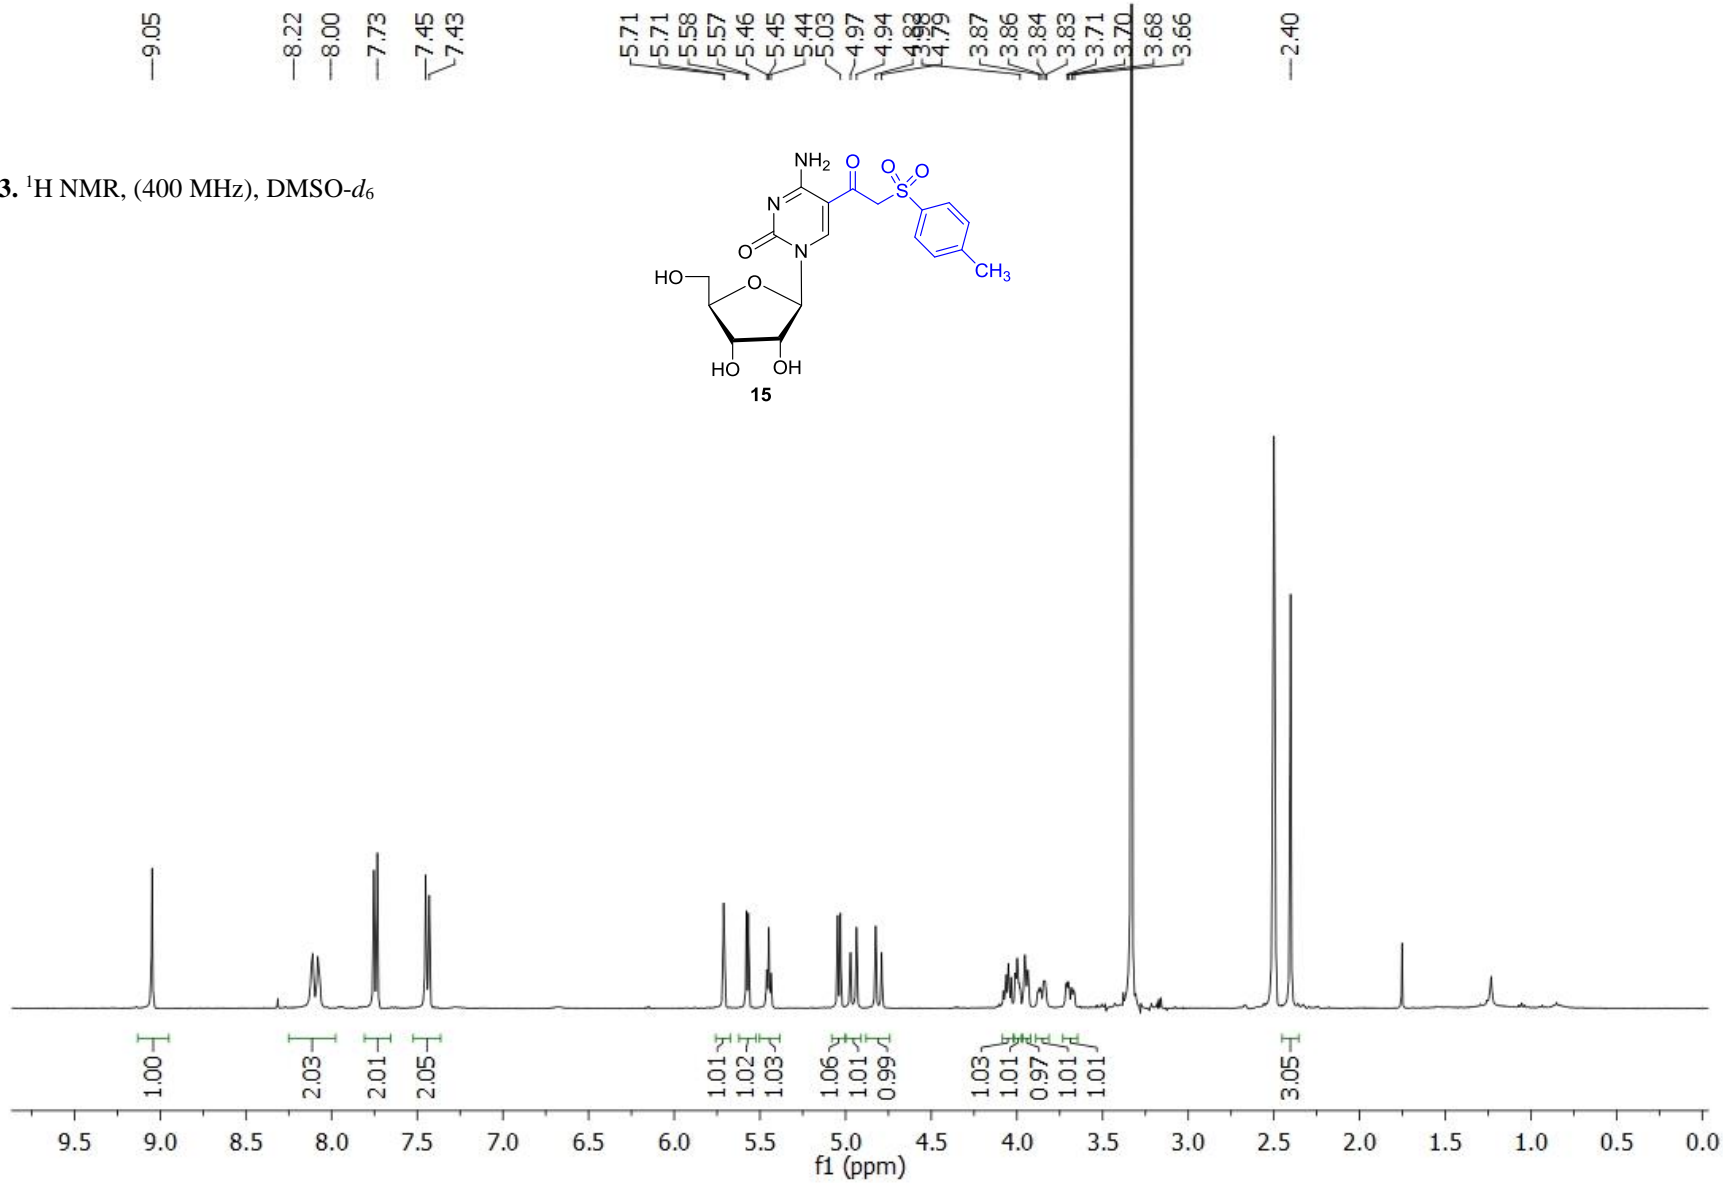



Figure S24.  $^{13}\text{C}$  NMR, (100 MHz),  $\text{DMSO-}d_6$

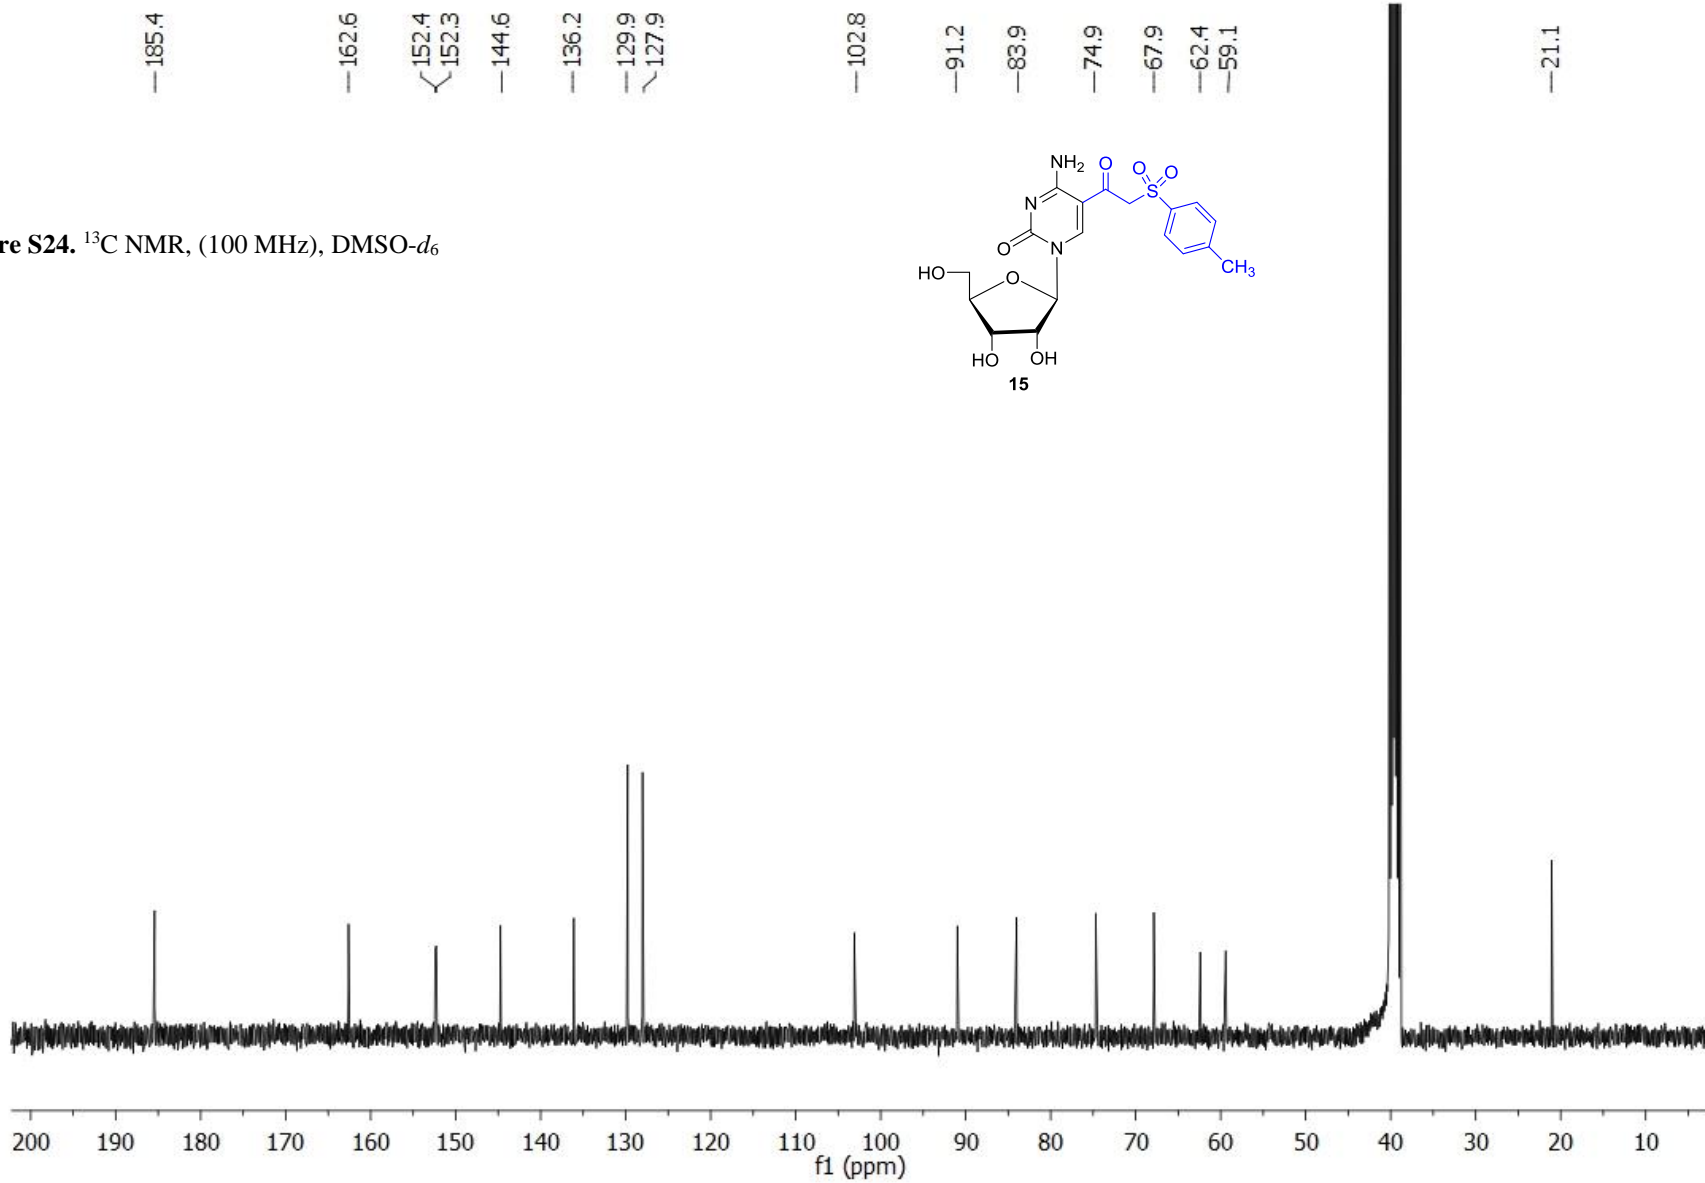

Figure S25. <sup>1</sup>H NMR, (400 MHz), DMSO-*d*<sub>6</sub>

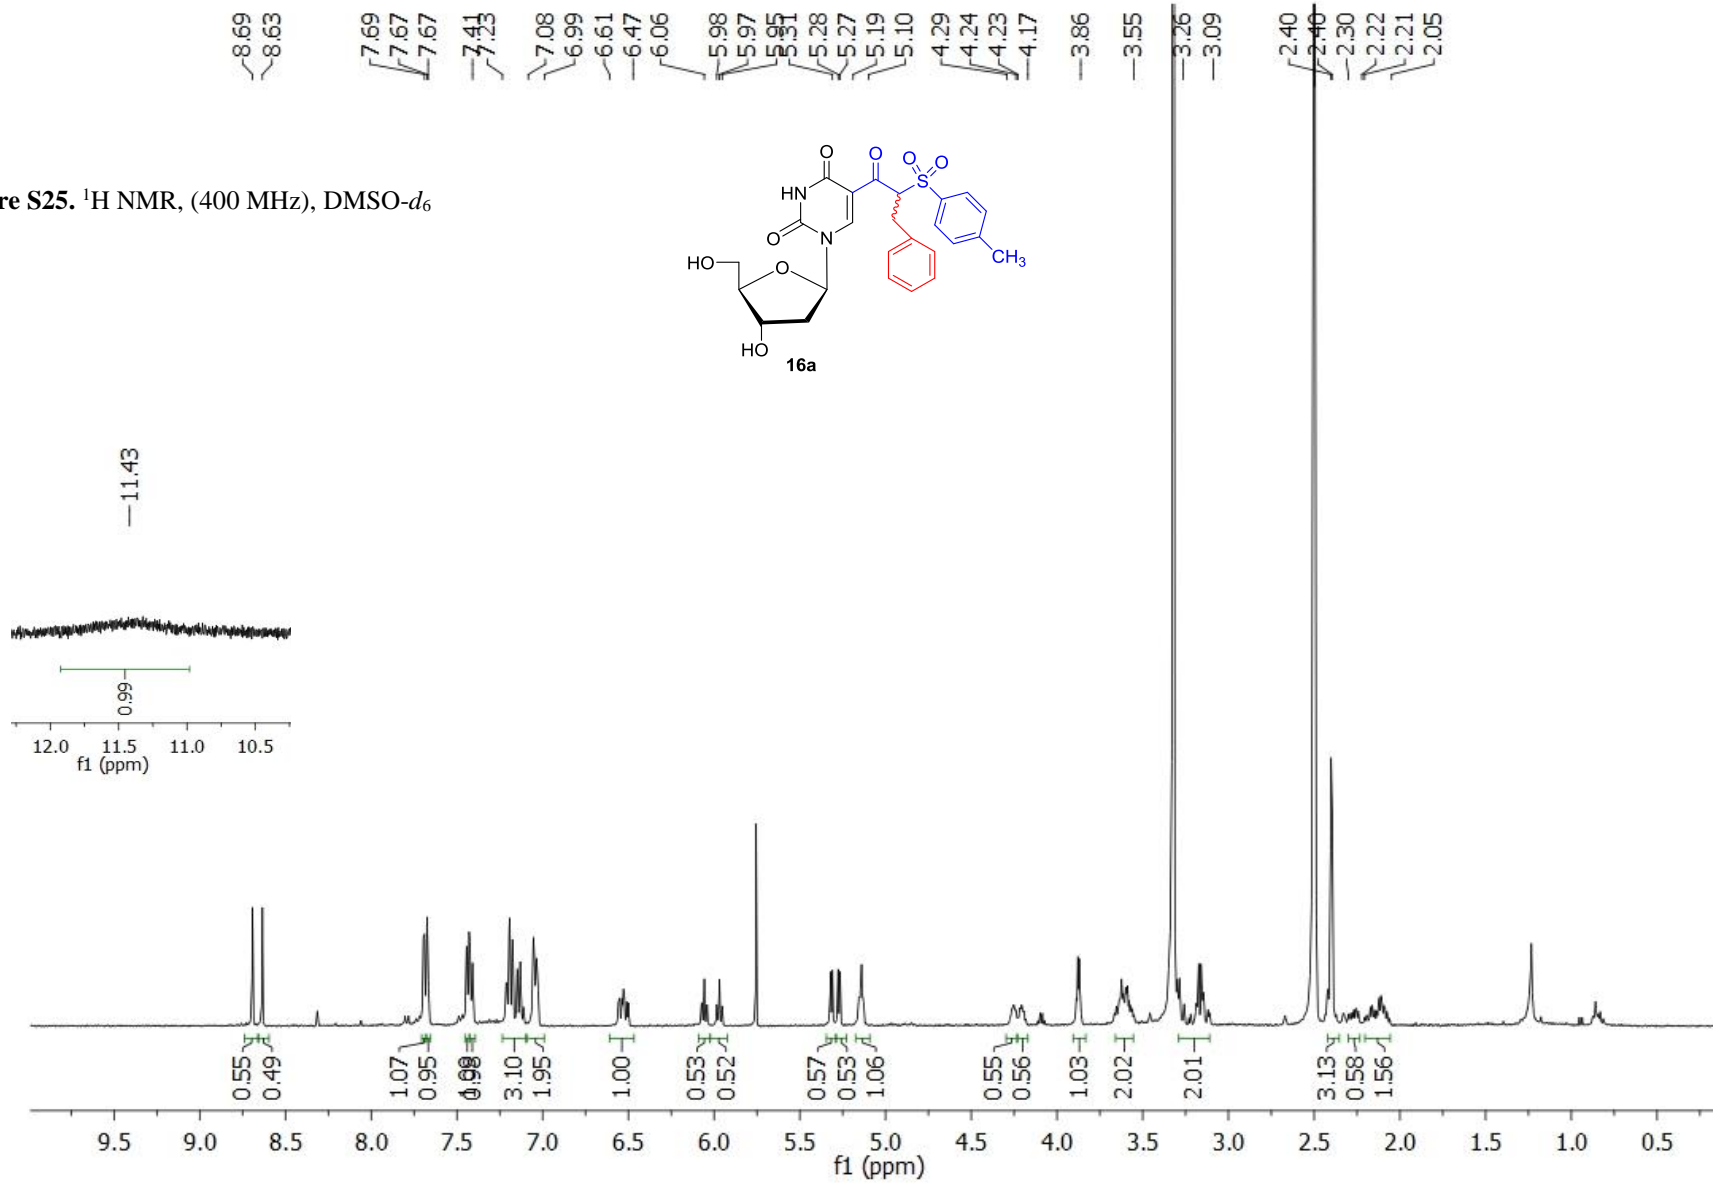

Figure S26.  $^{13}\text{C}$  NMR, (100 MHz),  $\text{DMSO-}d_6$

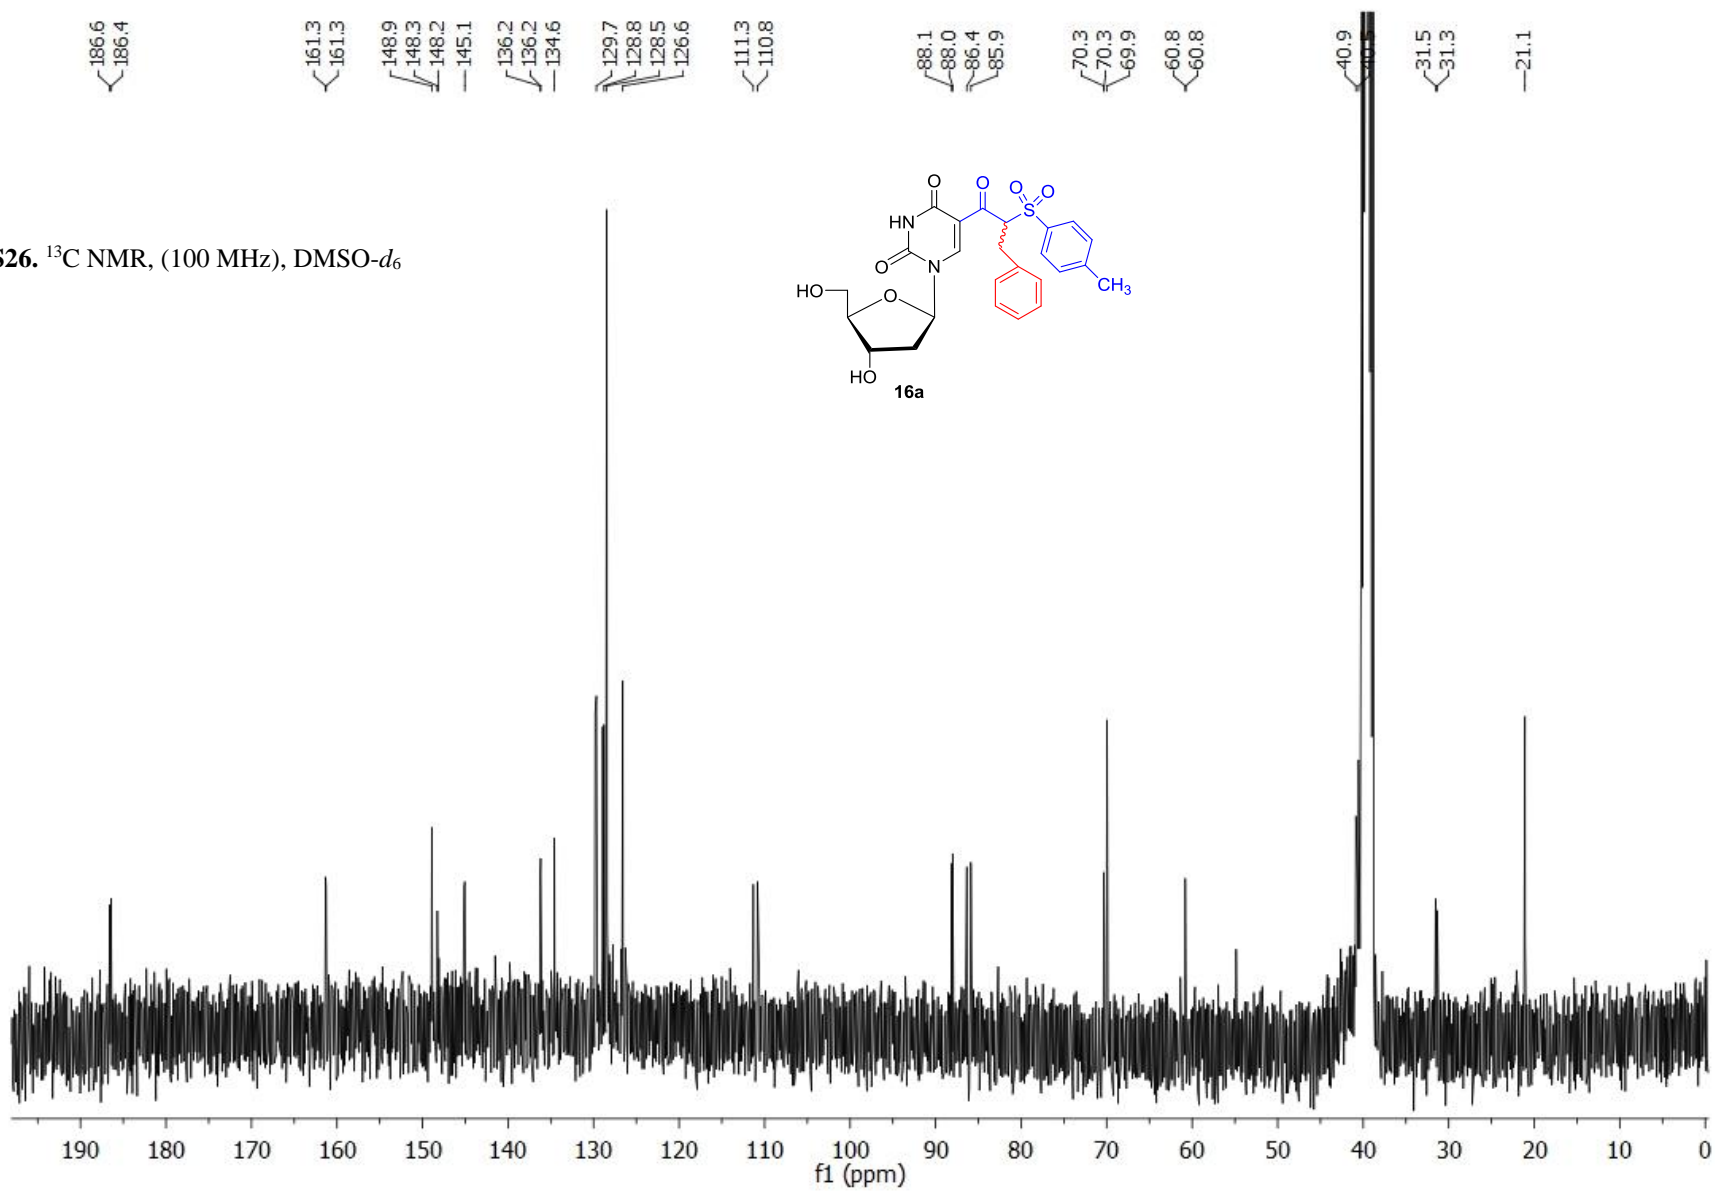

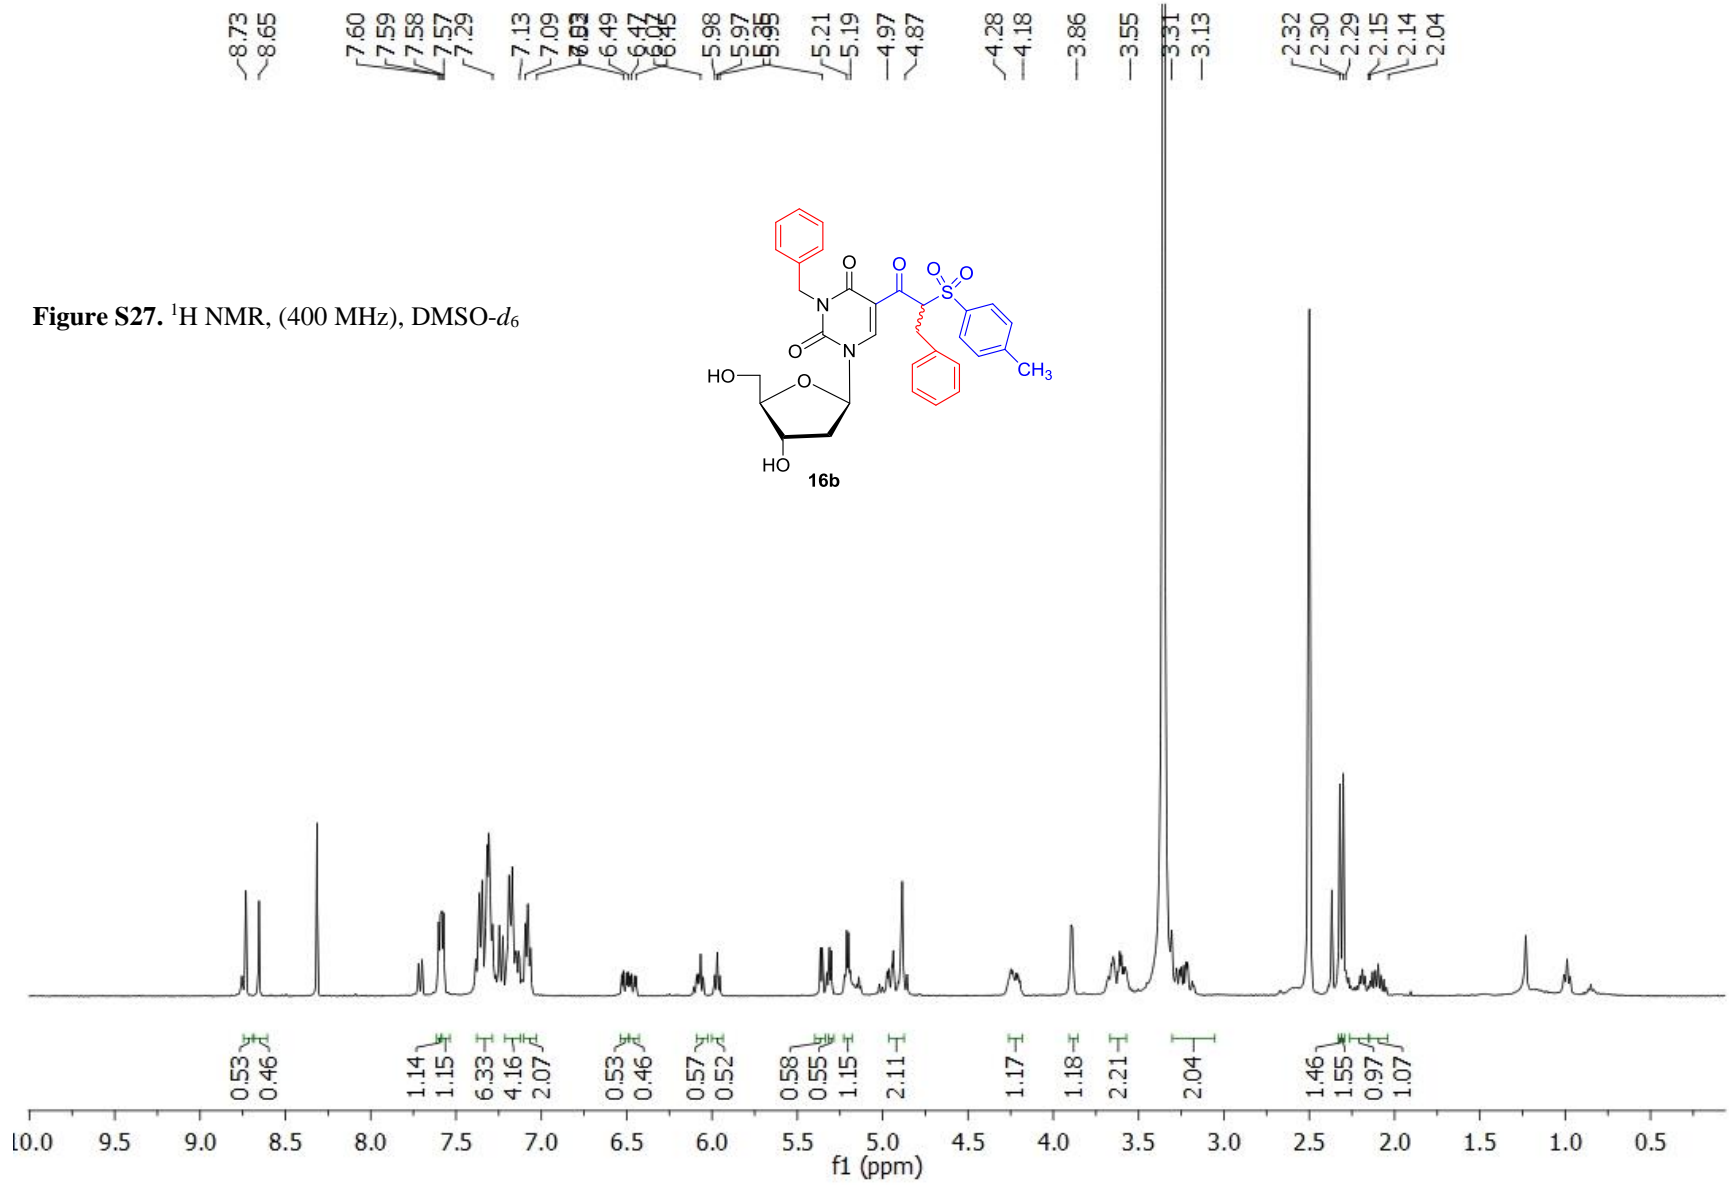

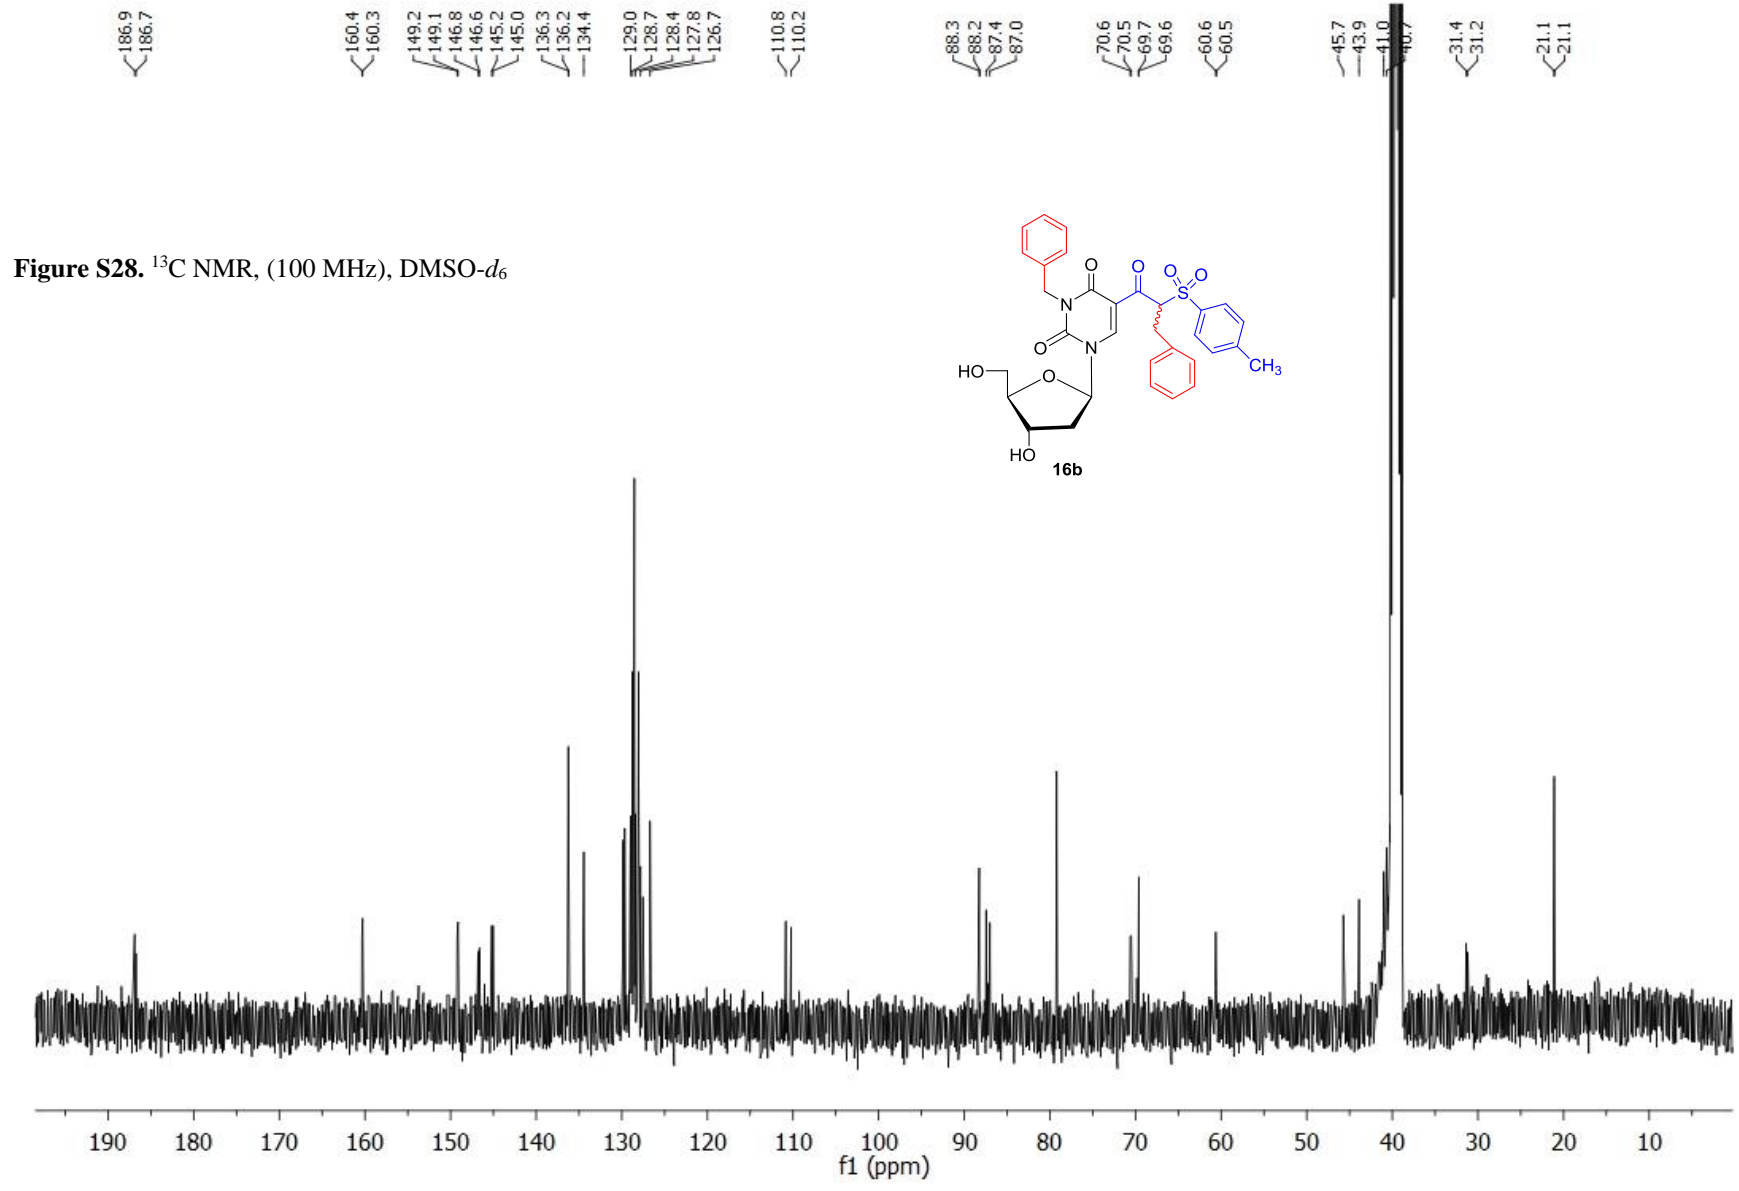

Figure S29. <sup>1</sup>H NMR, (400 MHz), DMSO-*d*<sub>6</sub>

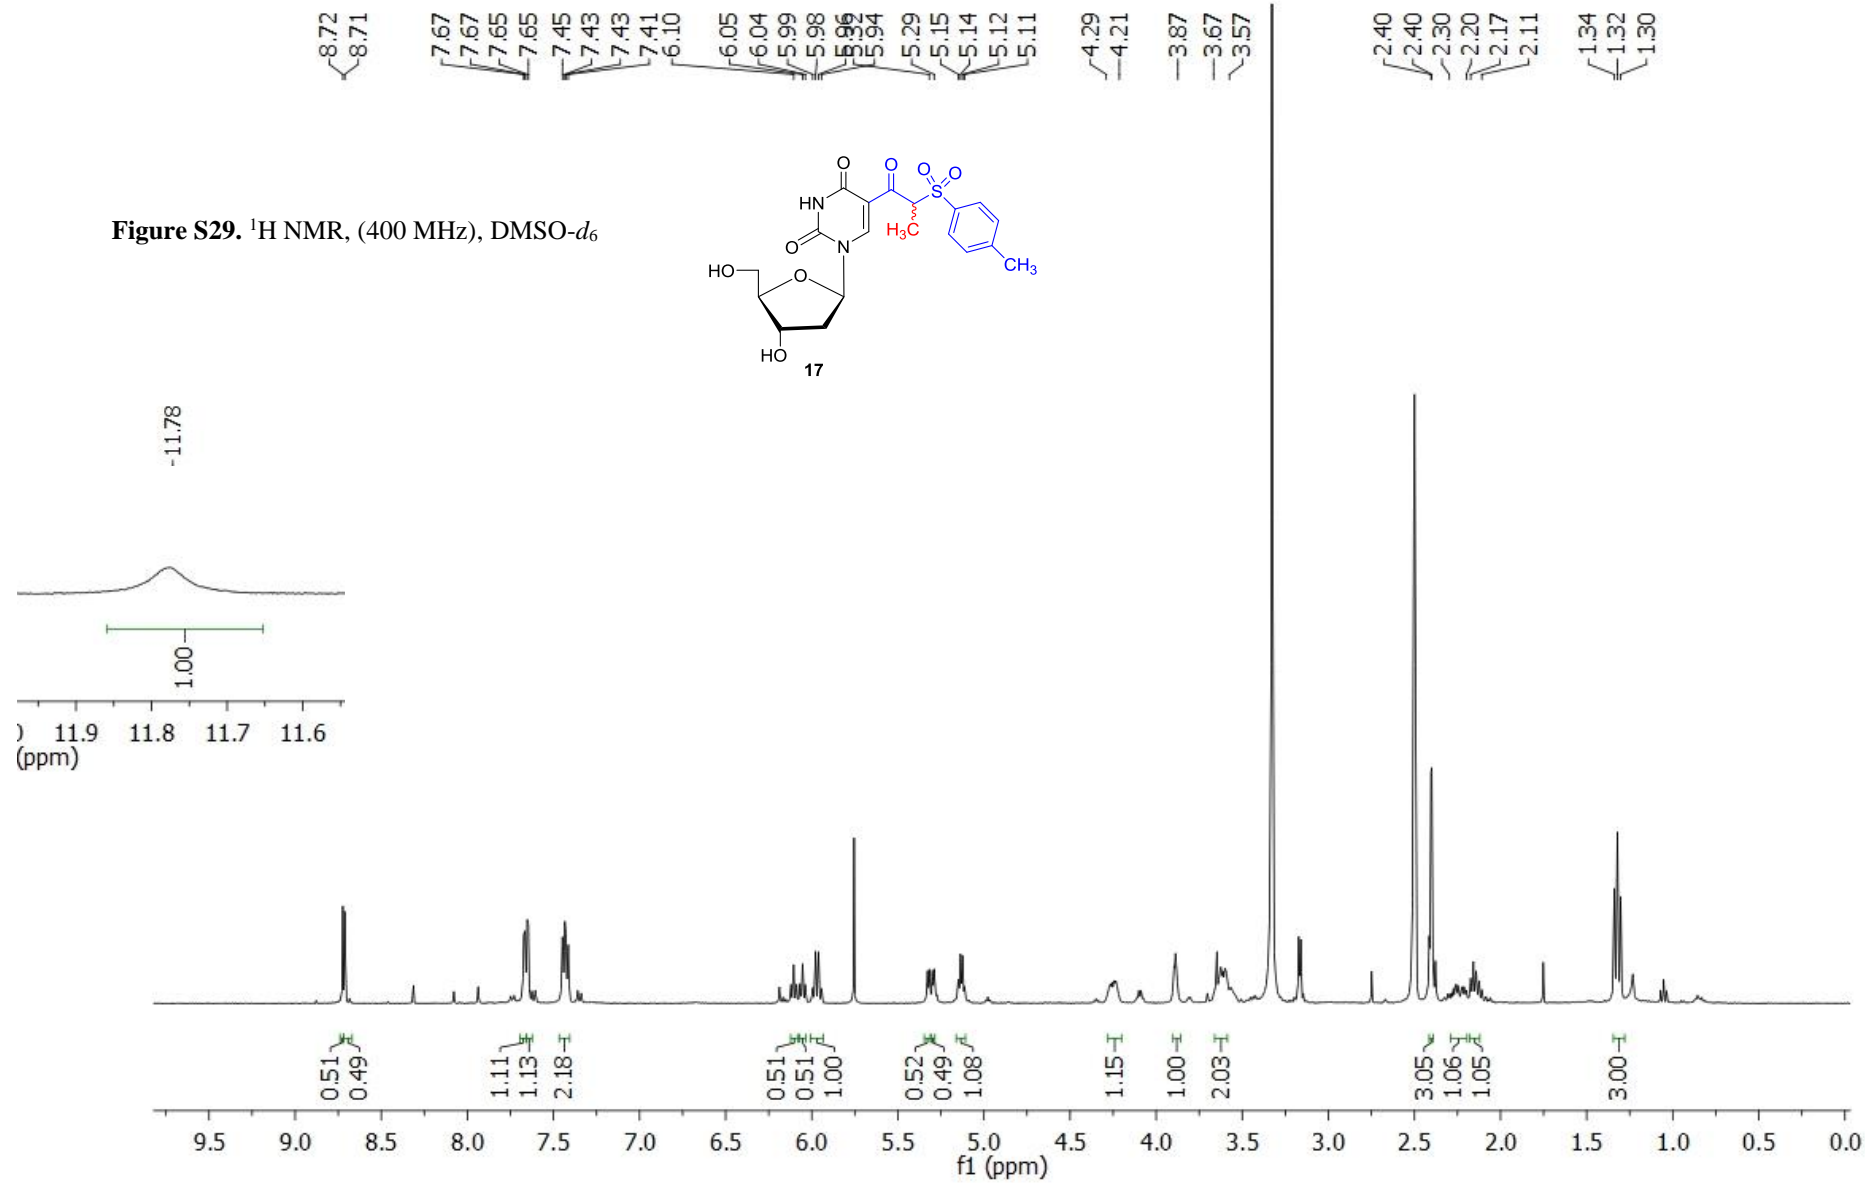

Figure S30.  $^{13}\text{C}$  NMR, (100 MHz),  $\text{DMSO-}d_6$

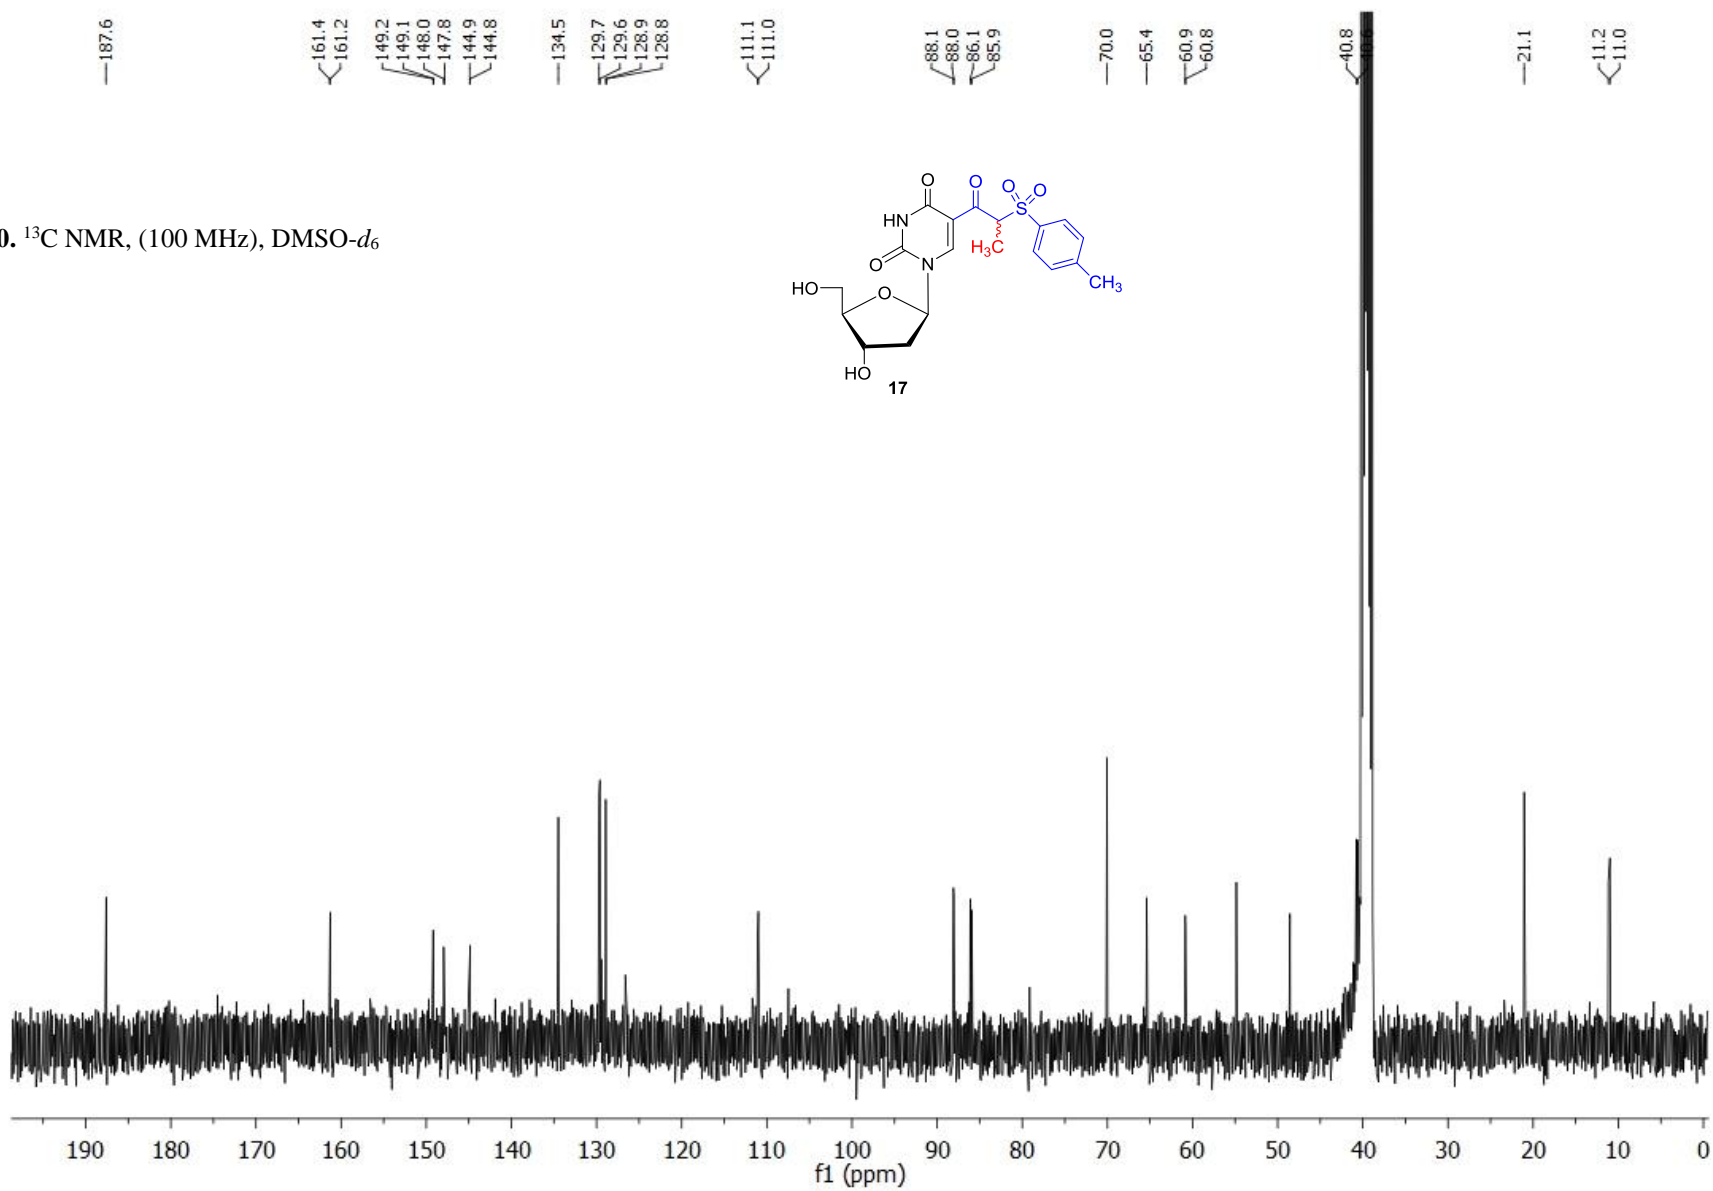

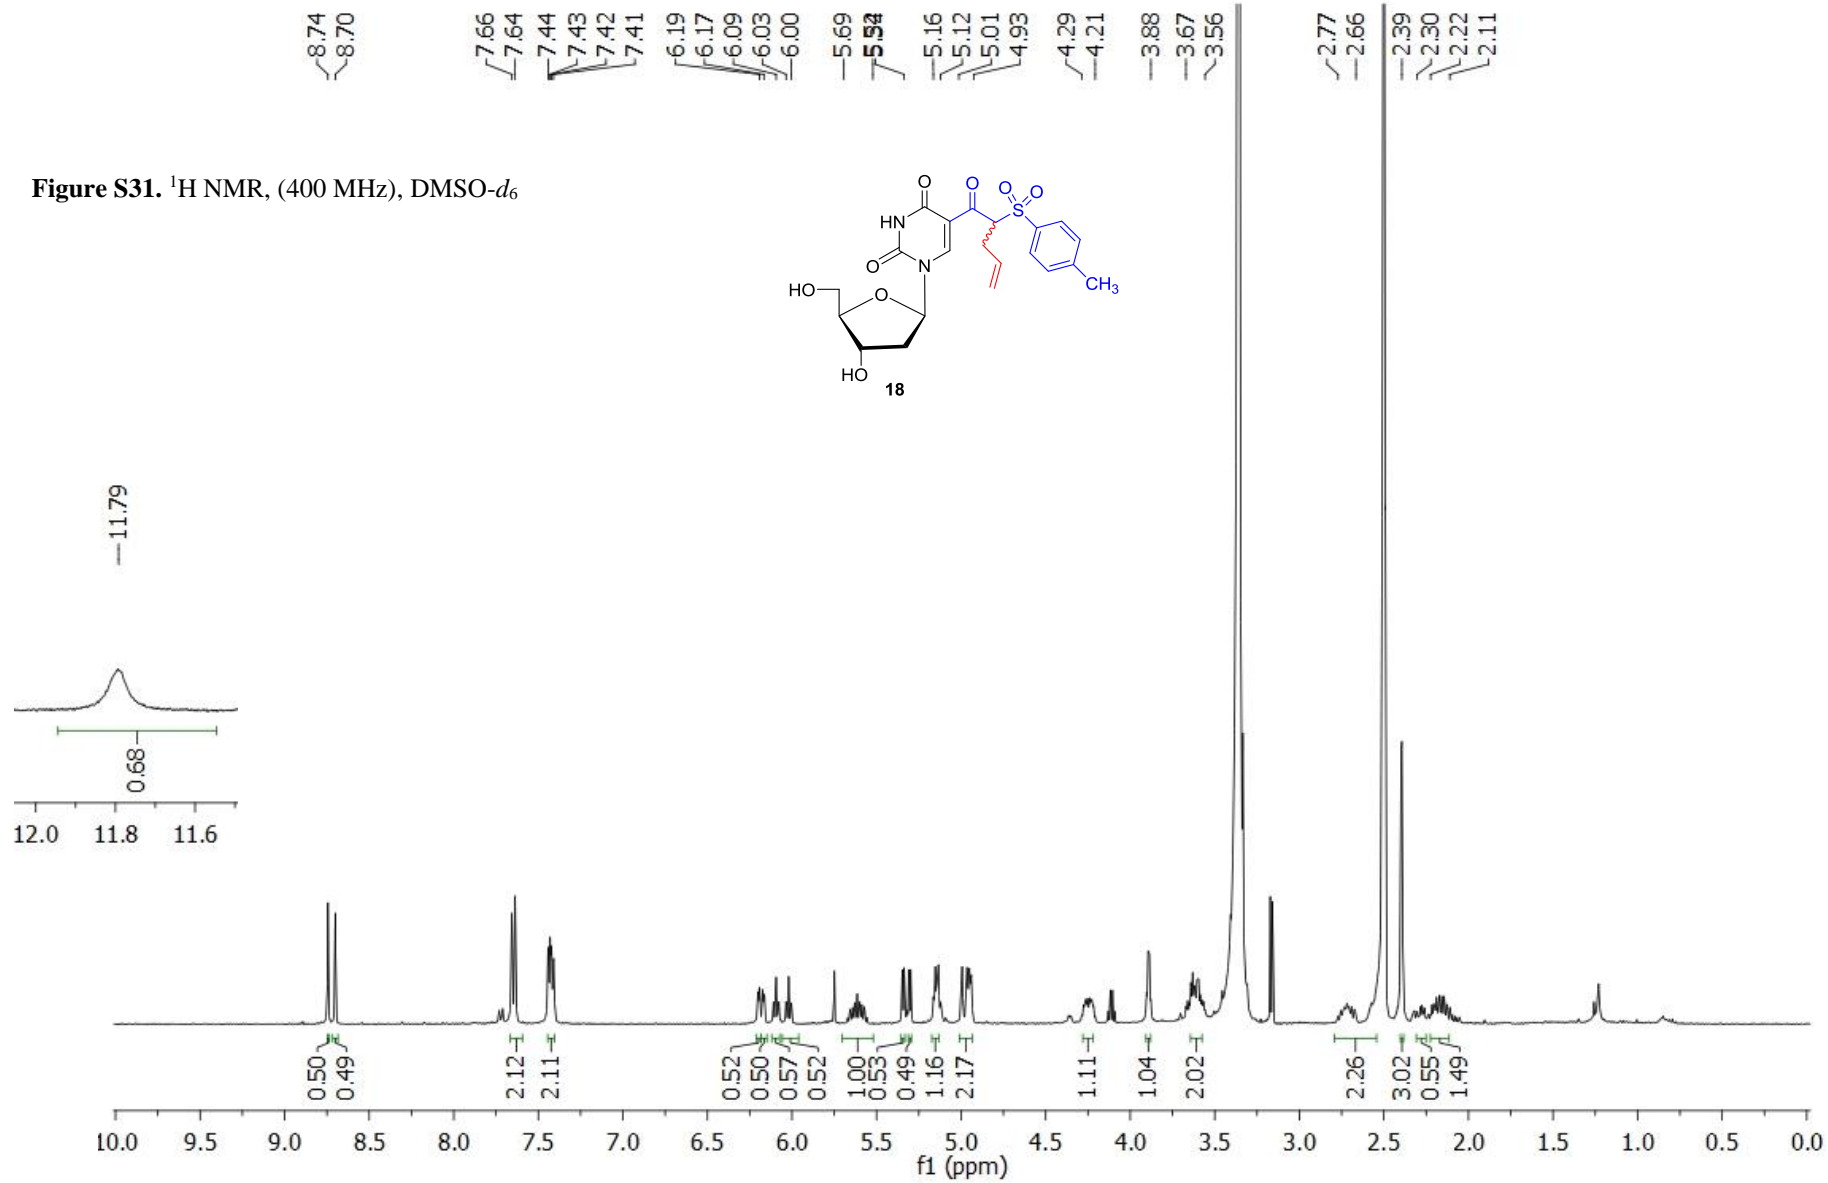



Figure S32.  $^{13}\text{C}$  NMR, (100 MHz),  $\text{DMSO-}d_6$

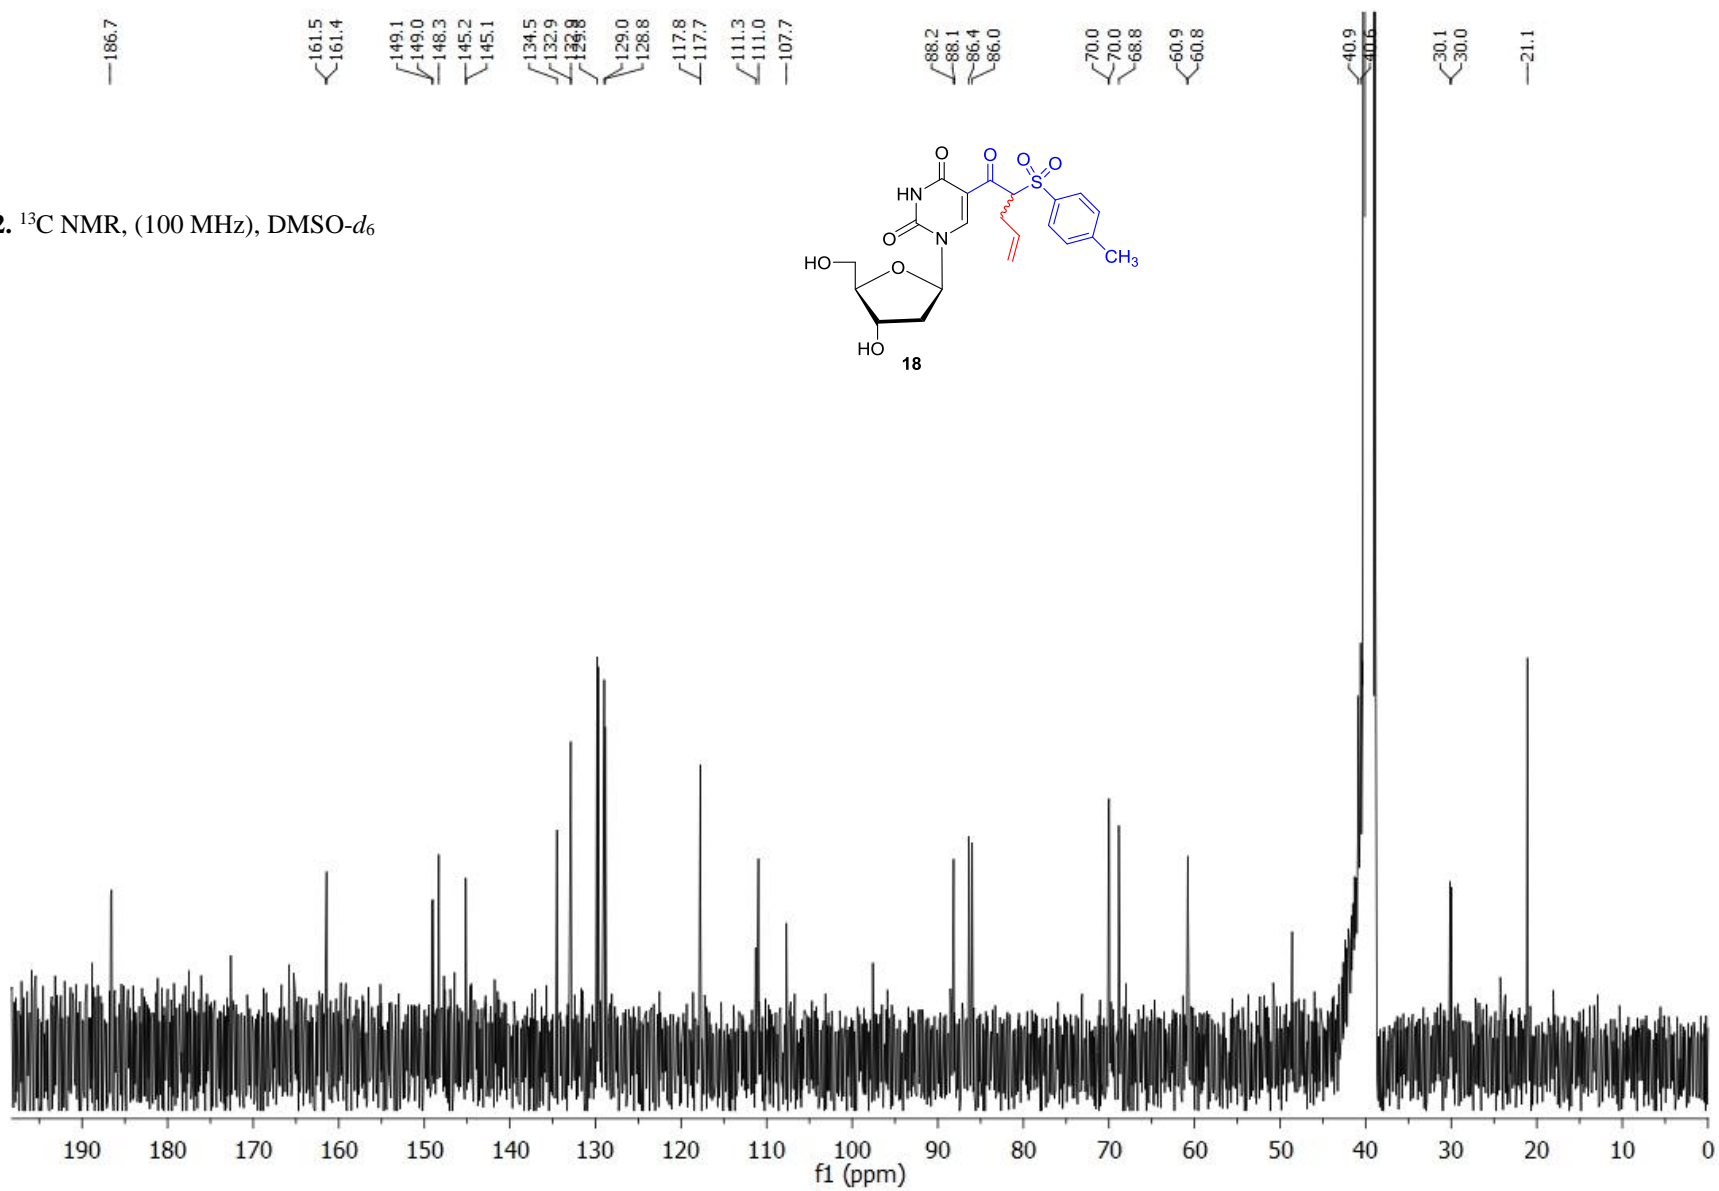

Figure S33. <sup>1</sup>H NMR, (400 MHz), DMSO-*d*<sub>6</sub>

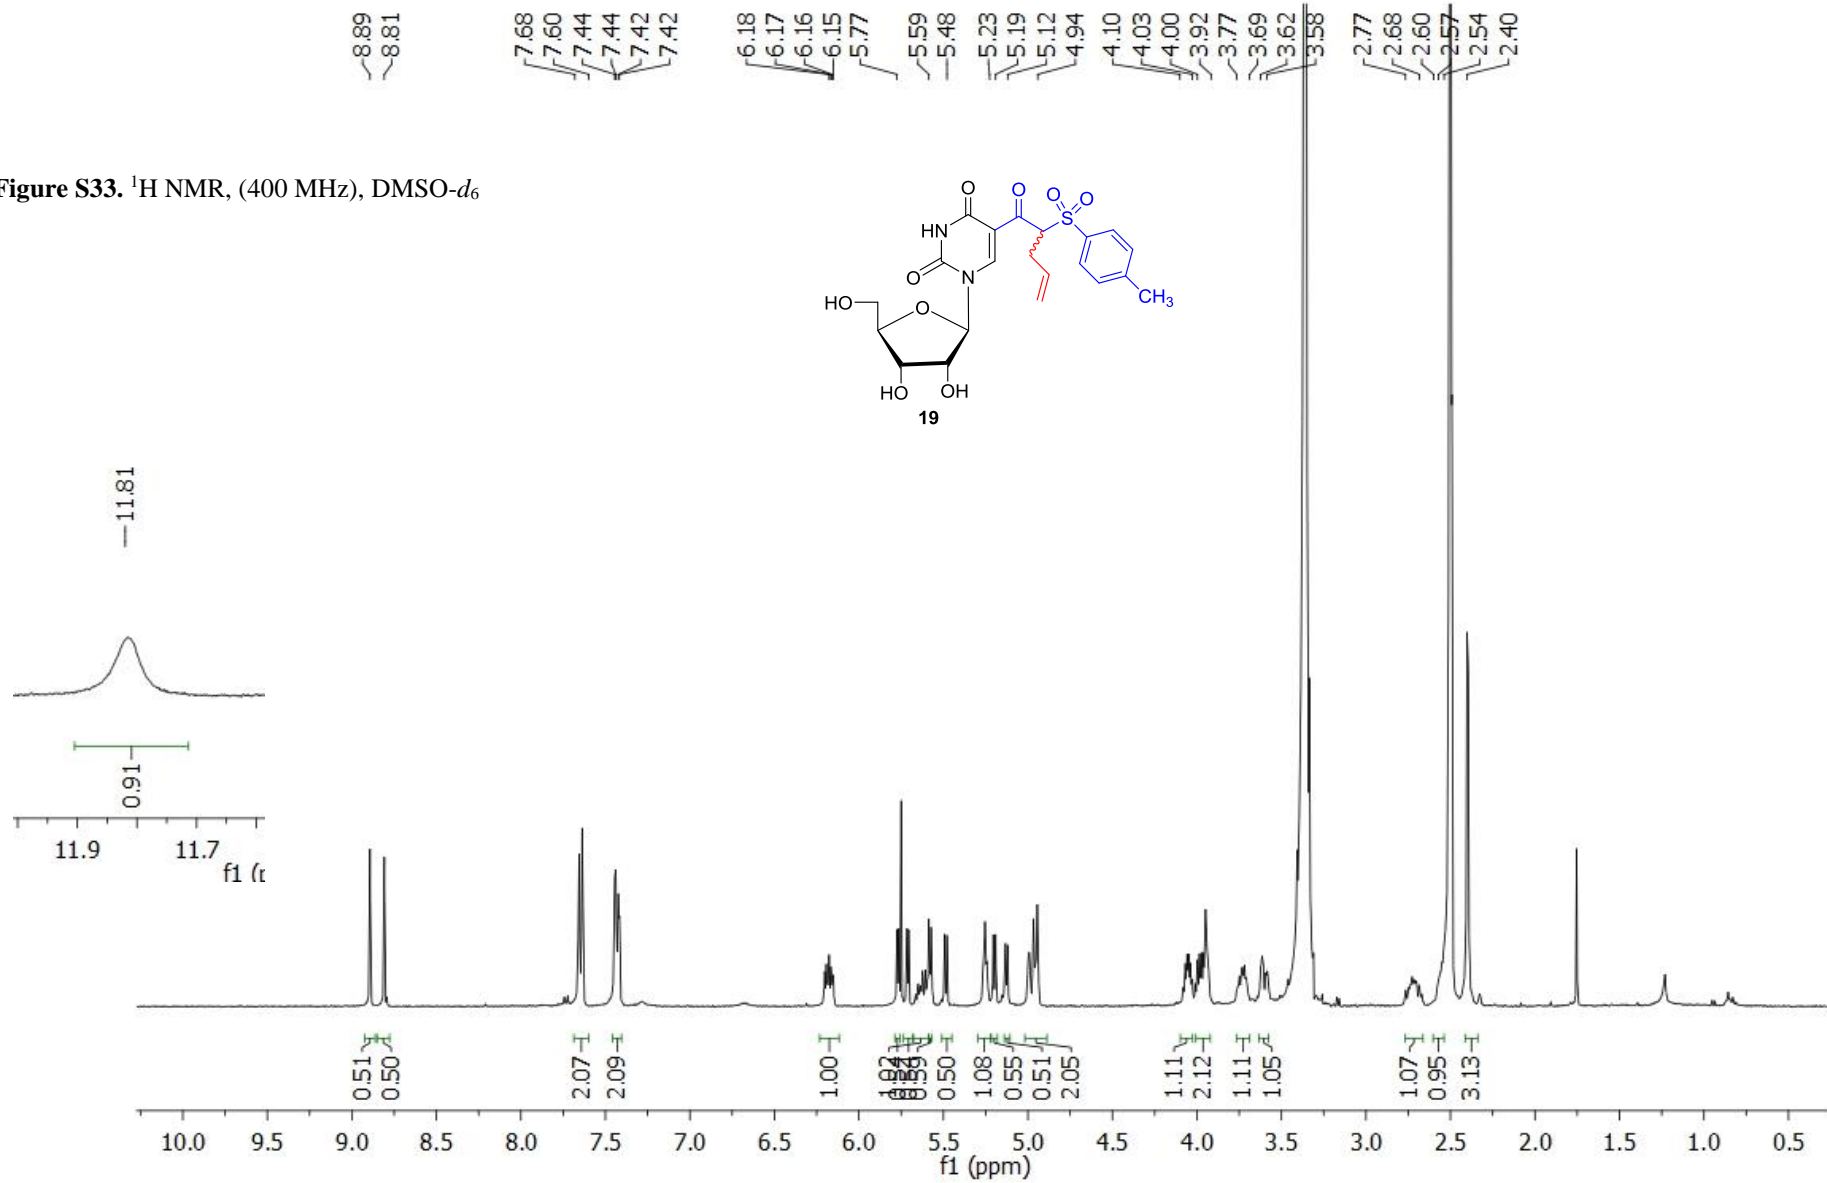

Figure S34.  $^{13}\text{C}$  NMR, (100 MHz),  $\text{DMSO-}d_6$

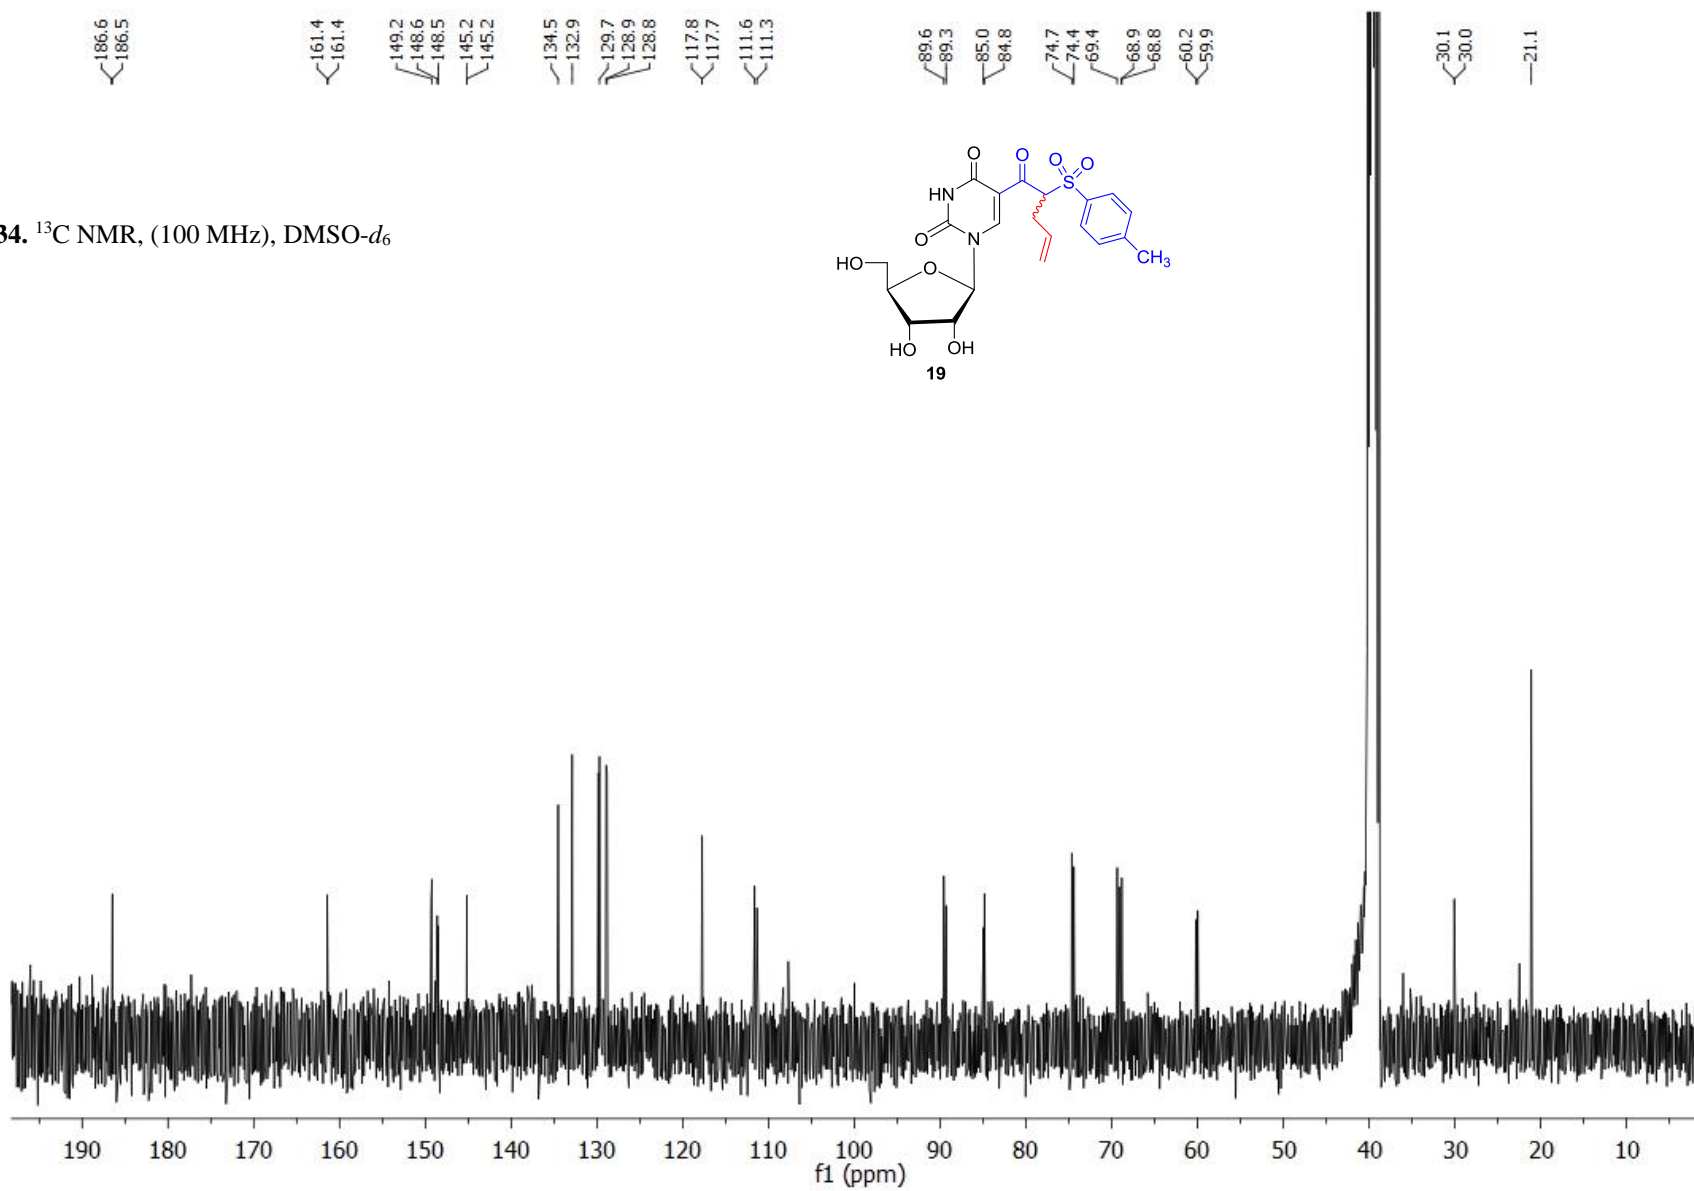

Figure S35. <sup>1</sup>H NMR, (400 MHz), DMSO-*d*<sub>6</sub>

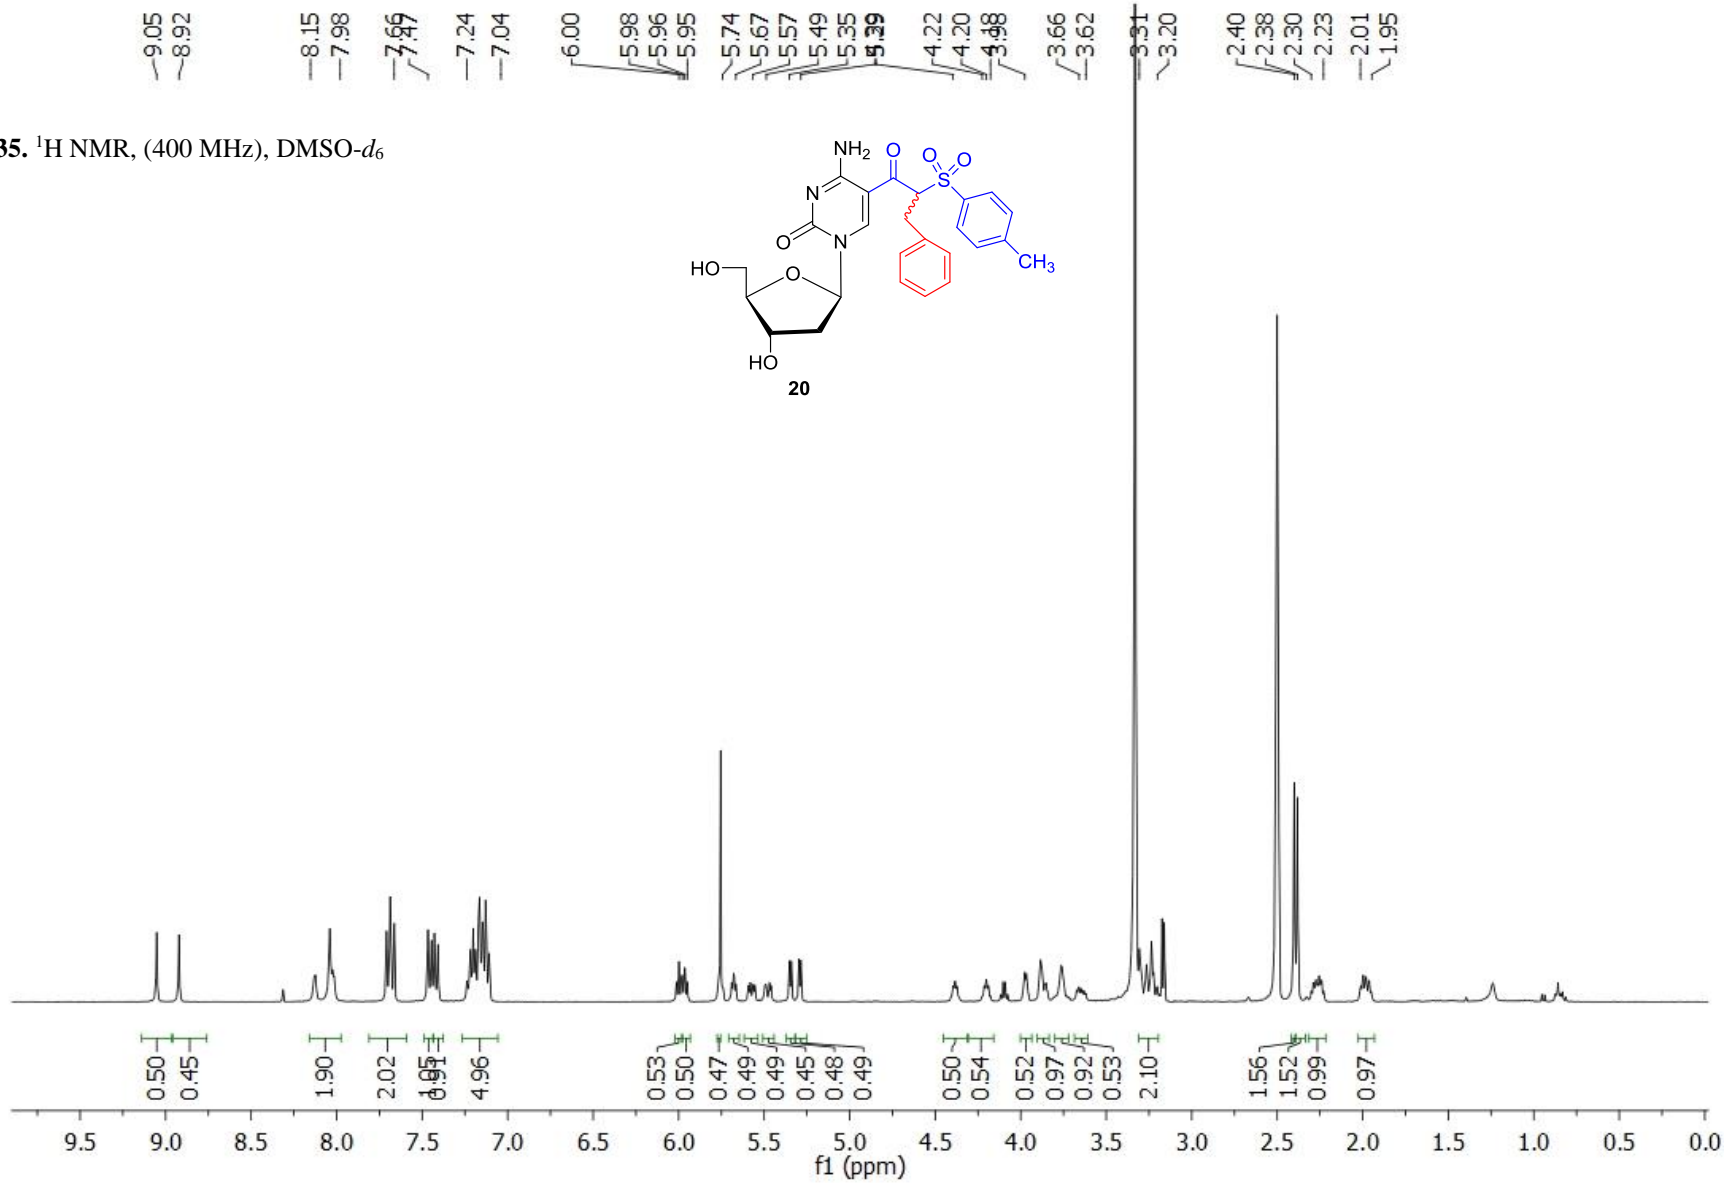

Figure S36.  $^{13}\text{C}$  NMR, (100 MHz),  $\text{DMSO-}d_6$

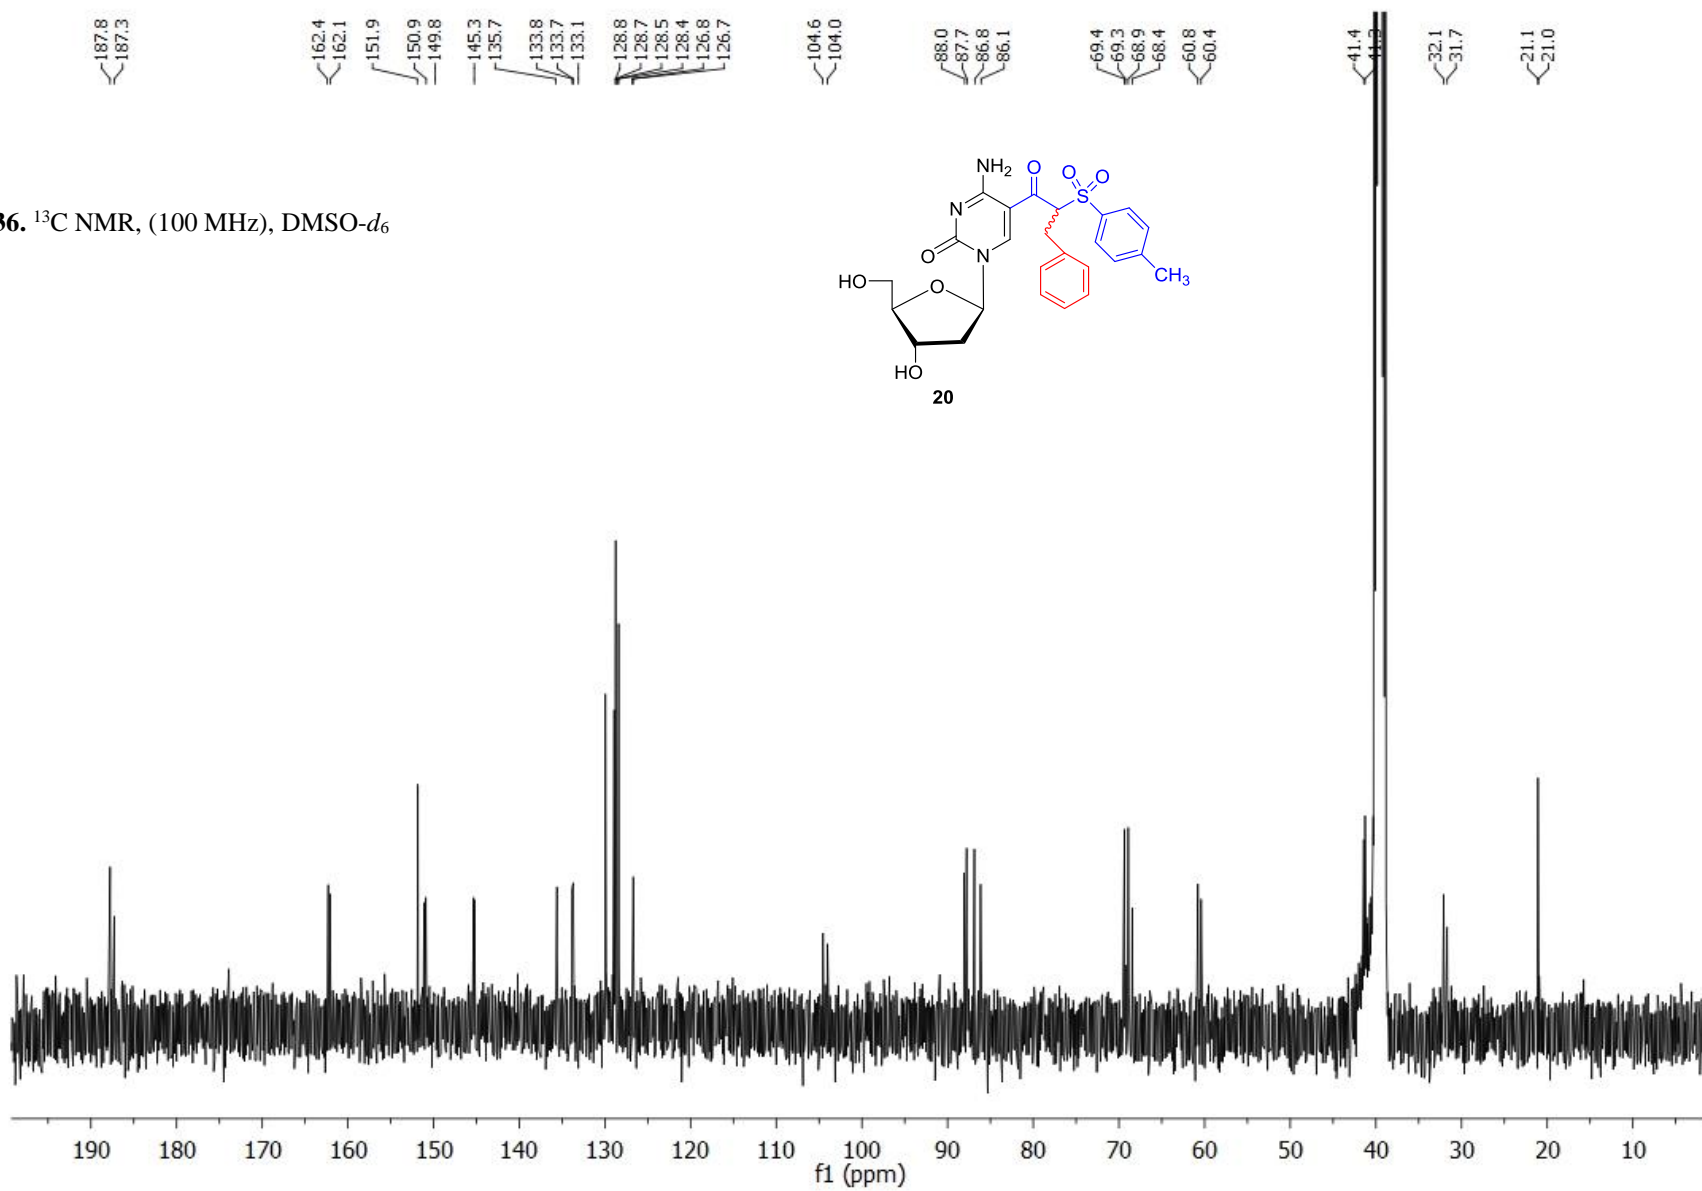

Figure S37. <sup>1</sup>H NMR, (400 MHz), DMSO-d<sub>6</sub>

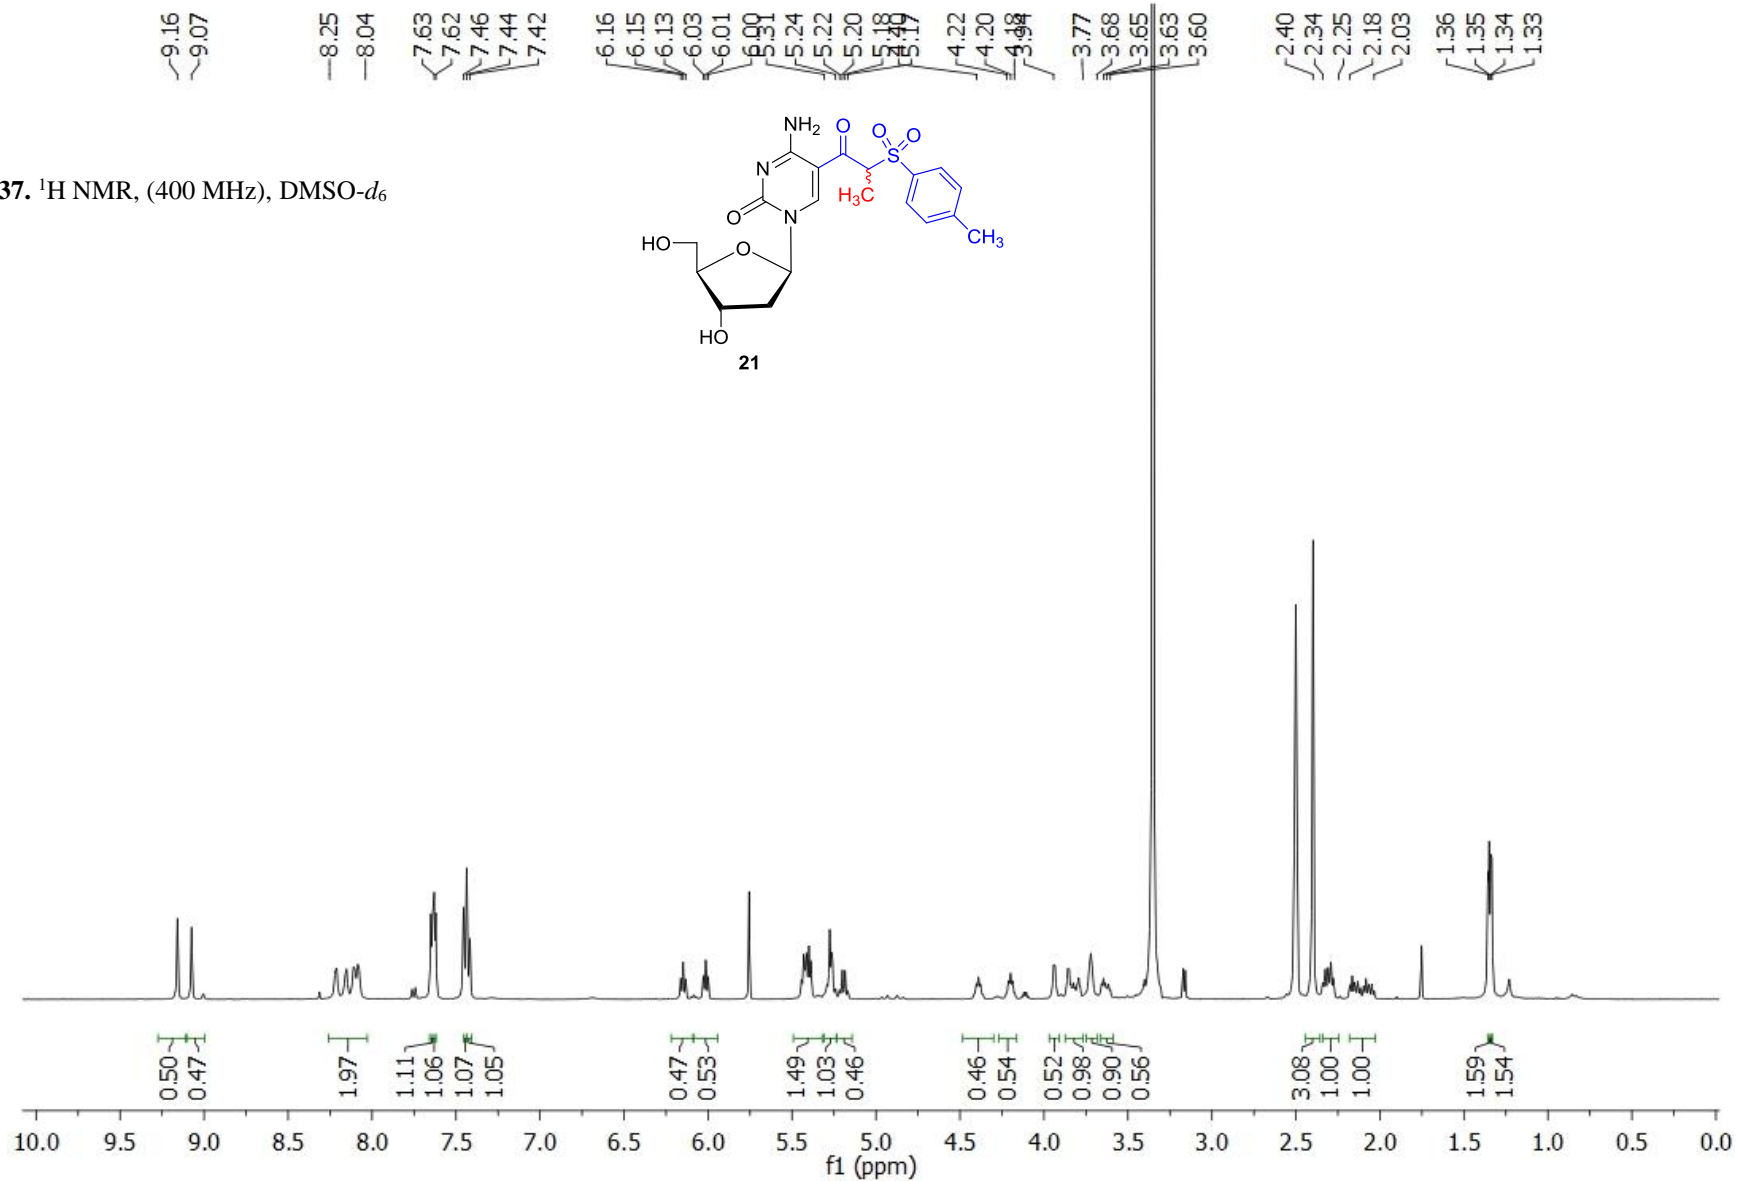

Figure S38.  $^{13}\text{C}$  NMR, (100 MHz),  $\text{DMSO-}d_6$

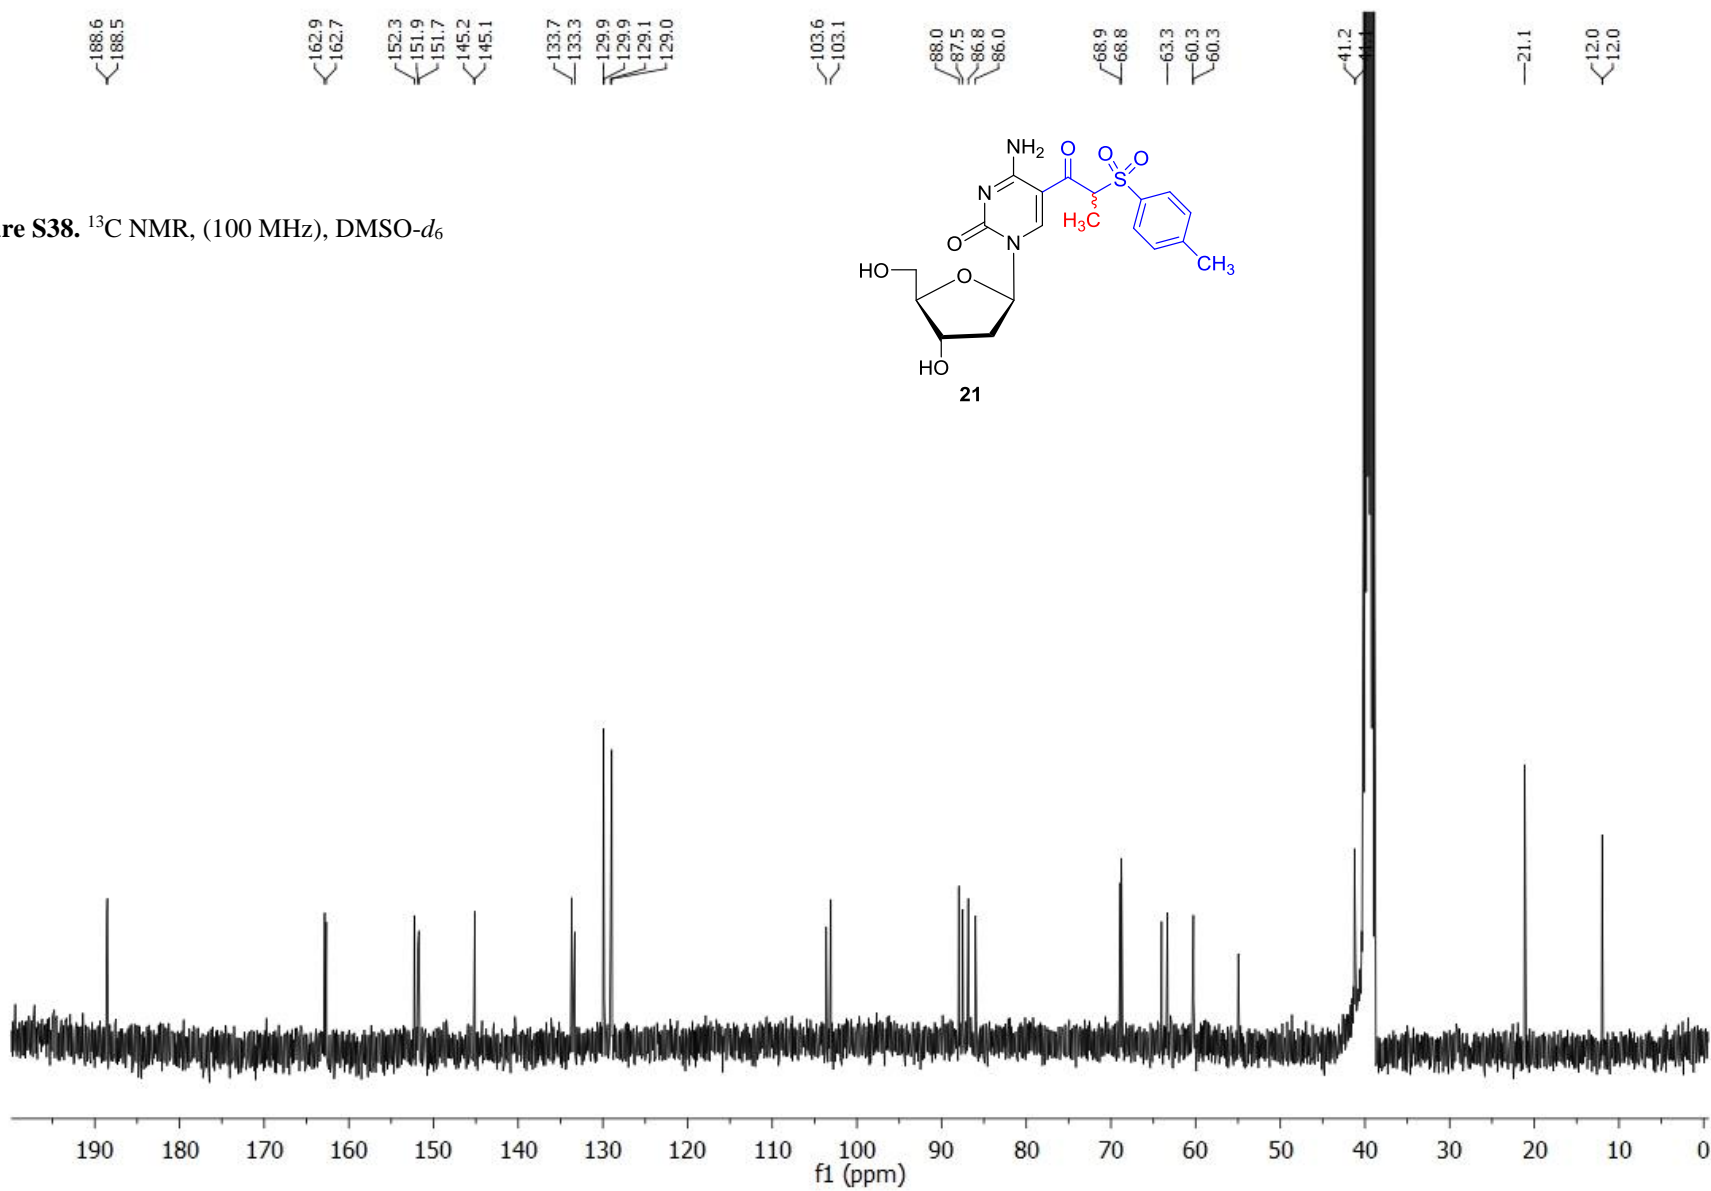

Figure S39. <sup>1</sup>H NMR, (400 MHz), DMSO-*d*<sub>6</sub>

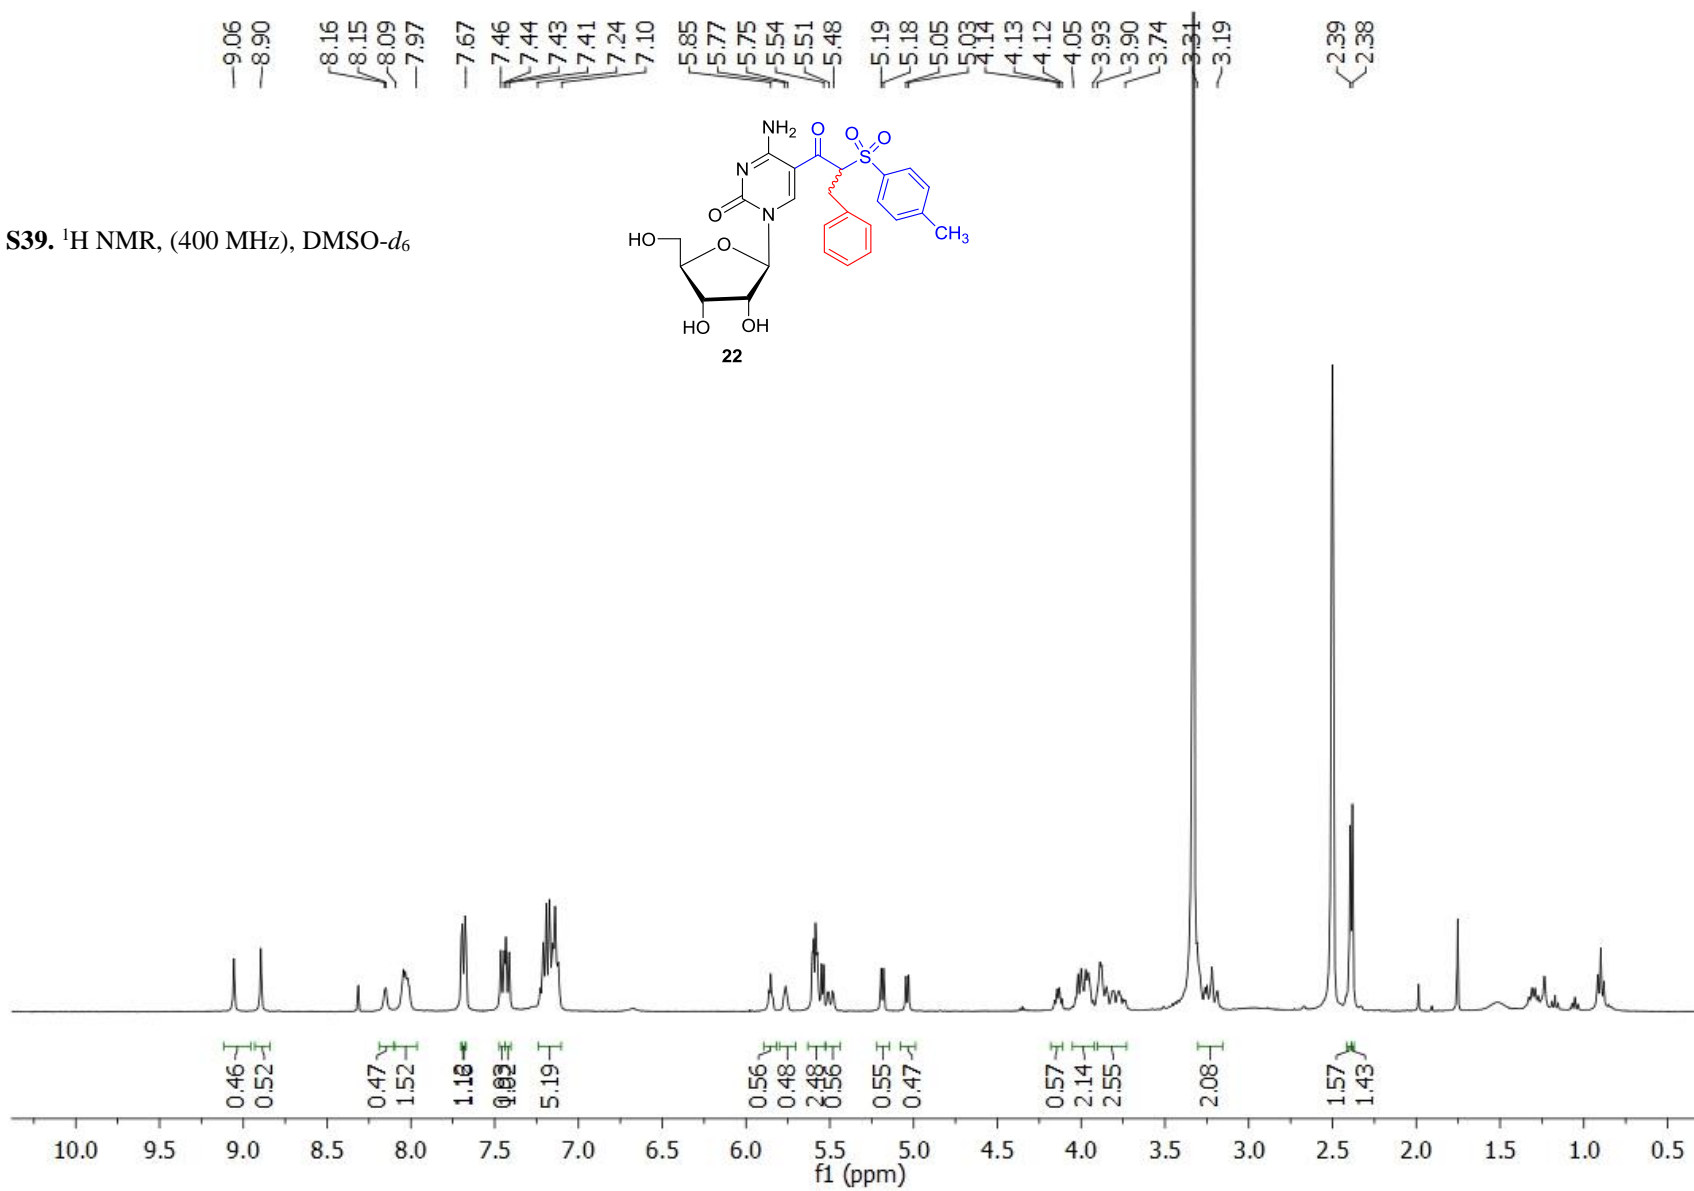



Figure S40. <sup>13</sup>C NMR, (100 MHz), DMSO-*d*<sub>6</sub>

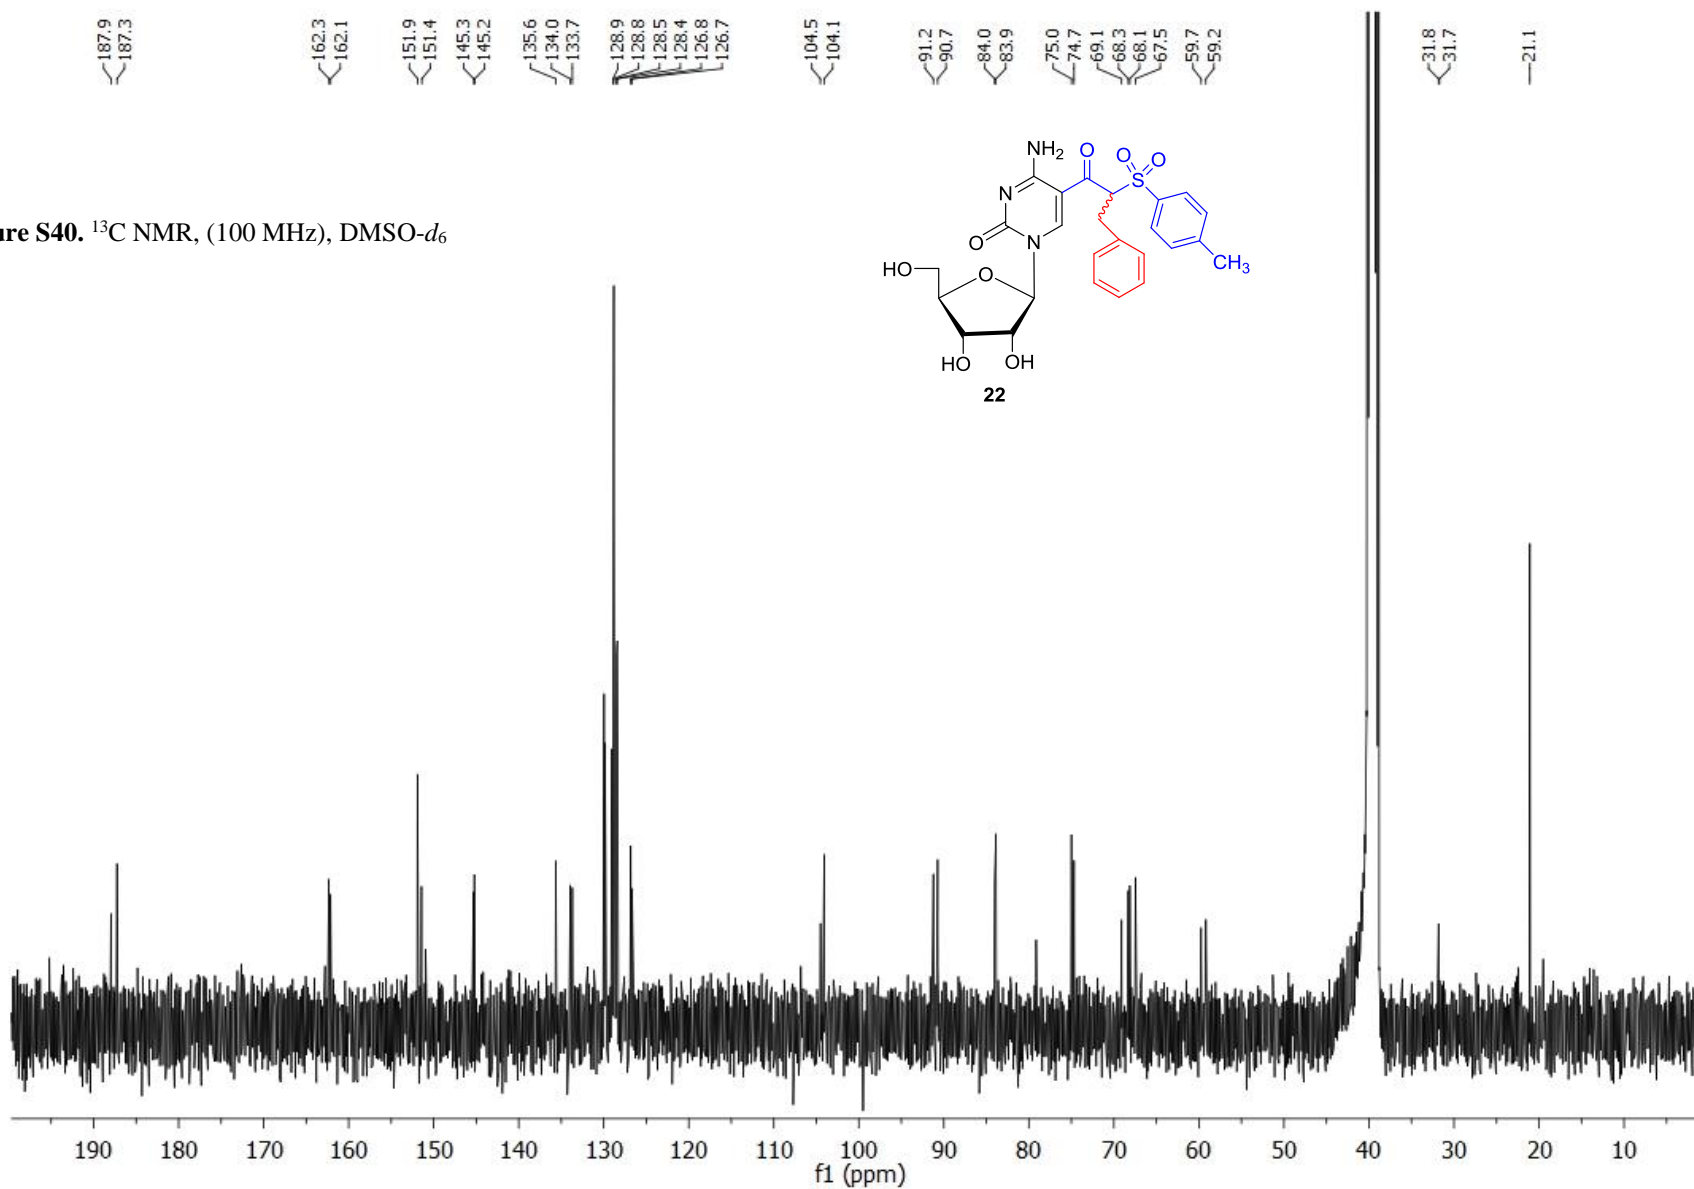

Figure S41. <sup>1</sup>H NMR, (400 MHz), DMSO-*d*<sub>6</sub>

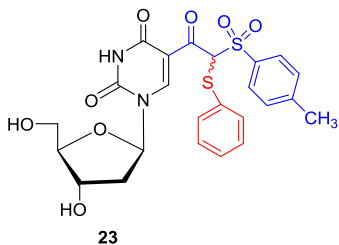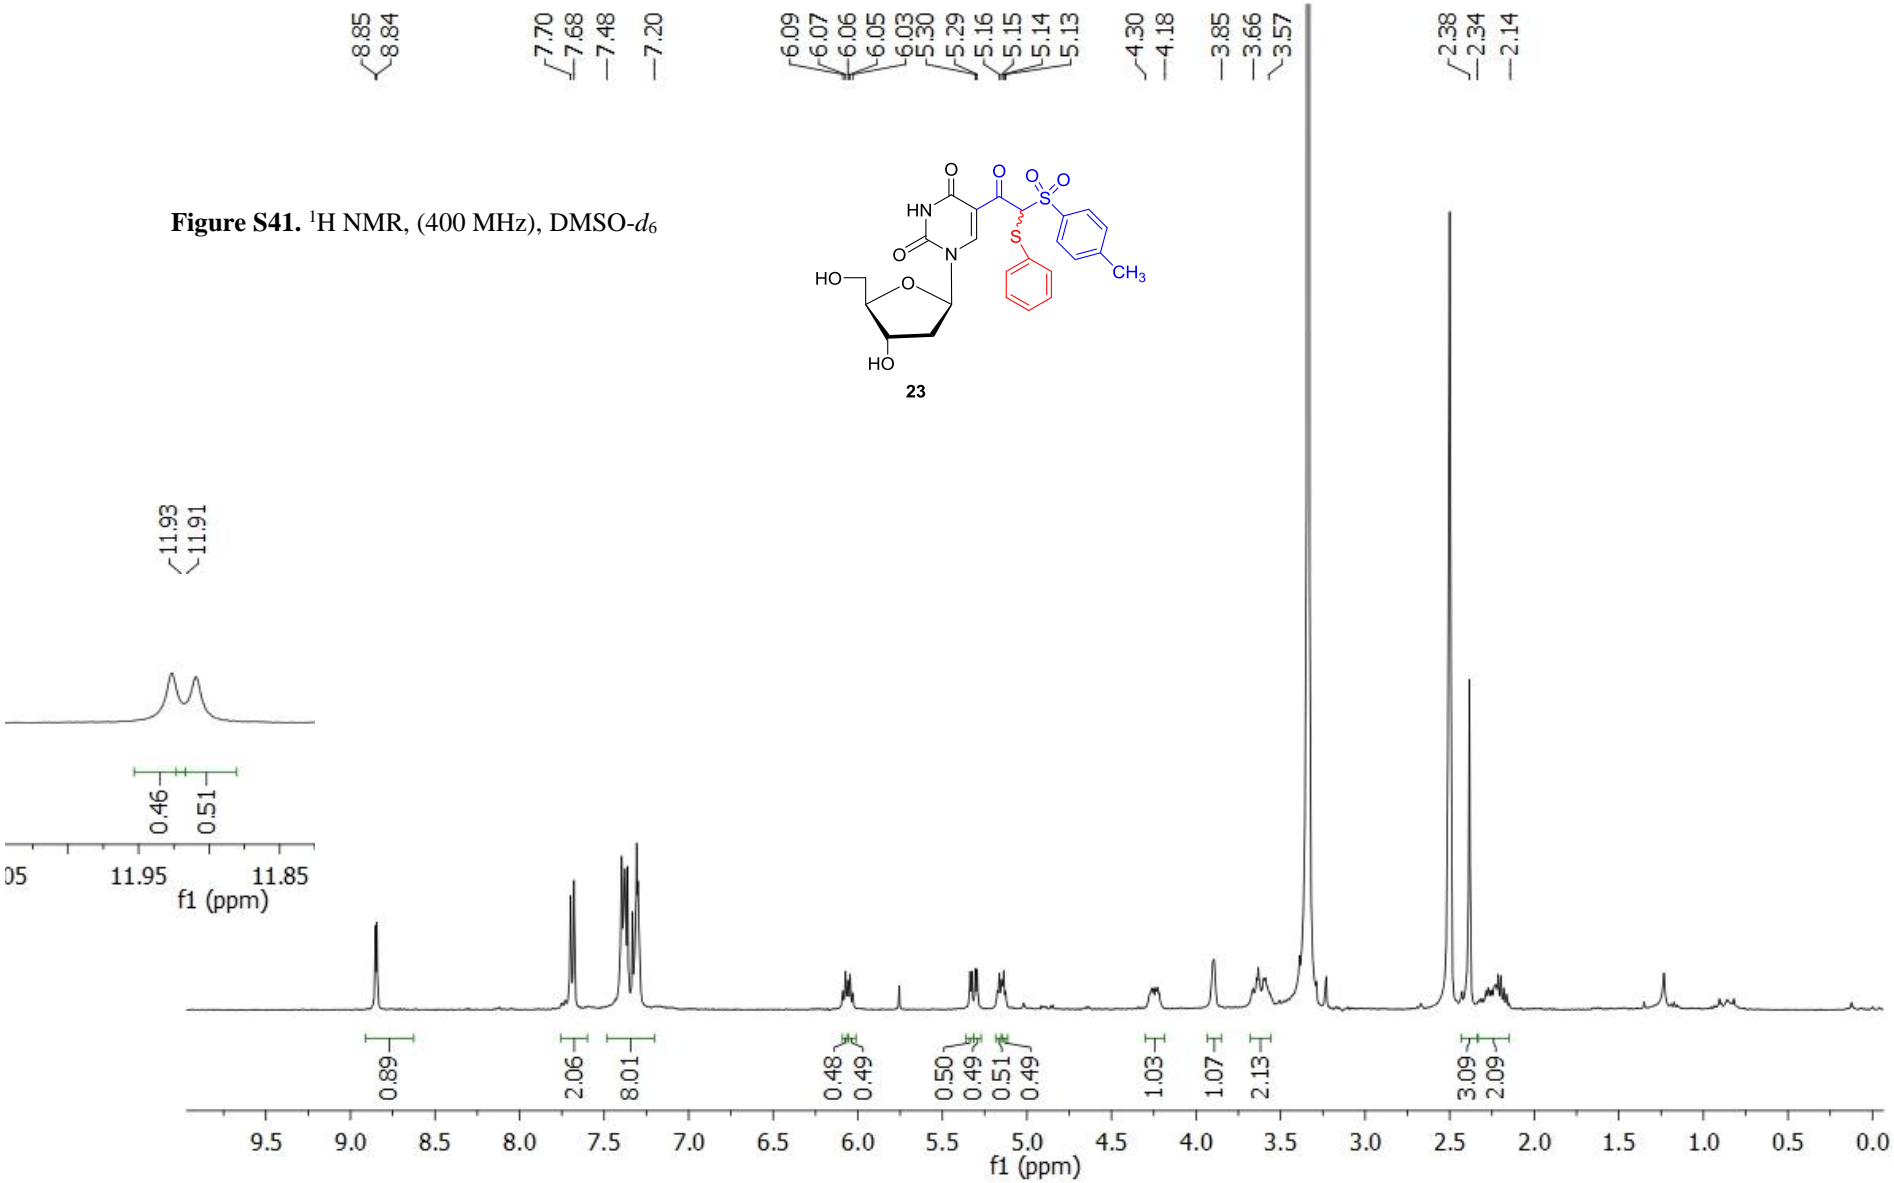

**Figure S42.**  $^{13}\text{C}$  NMR, (100 MHz),  $\text{DMSO-}d_6$

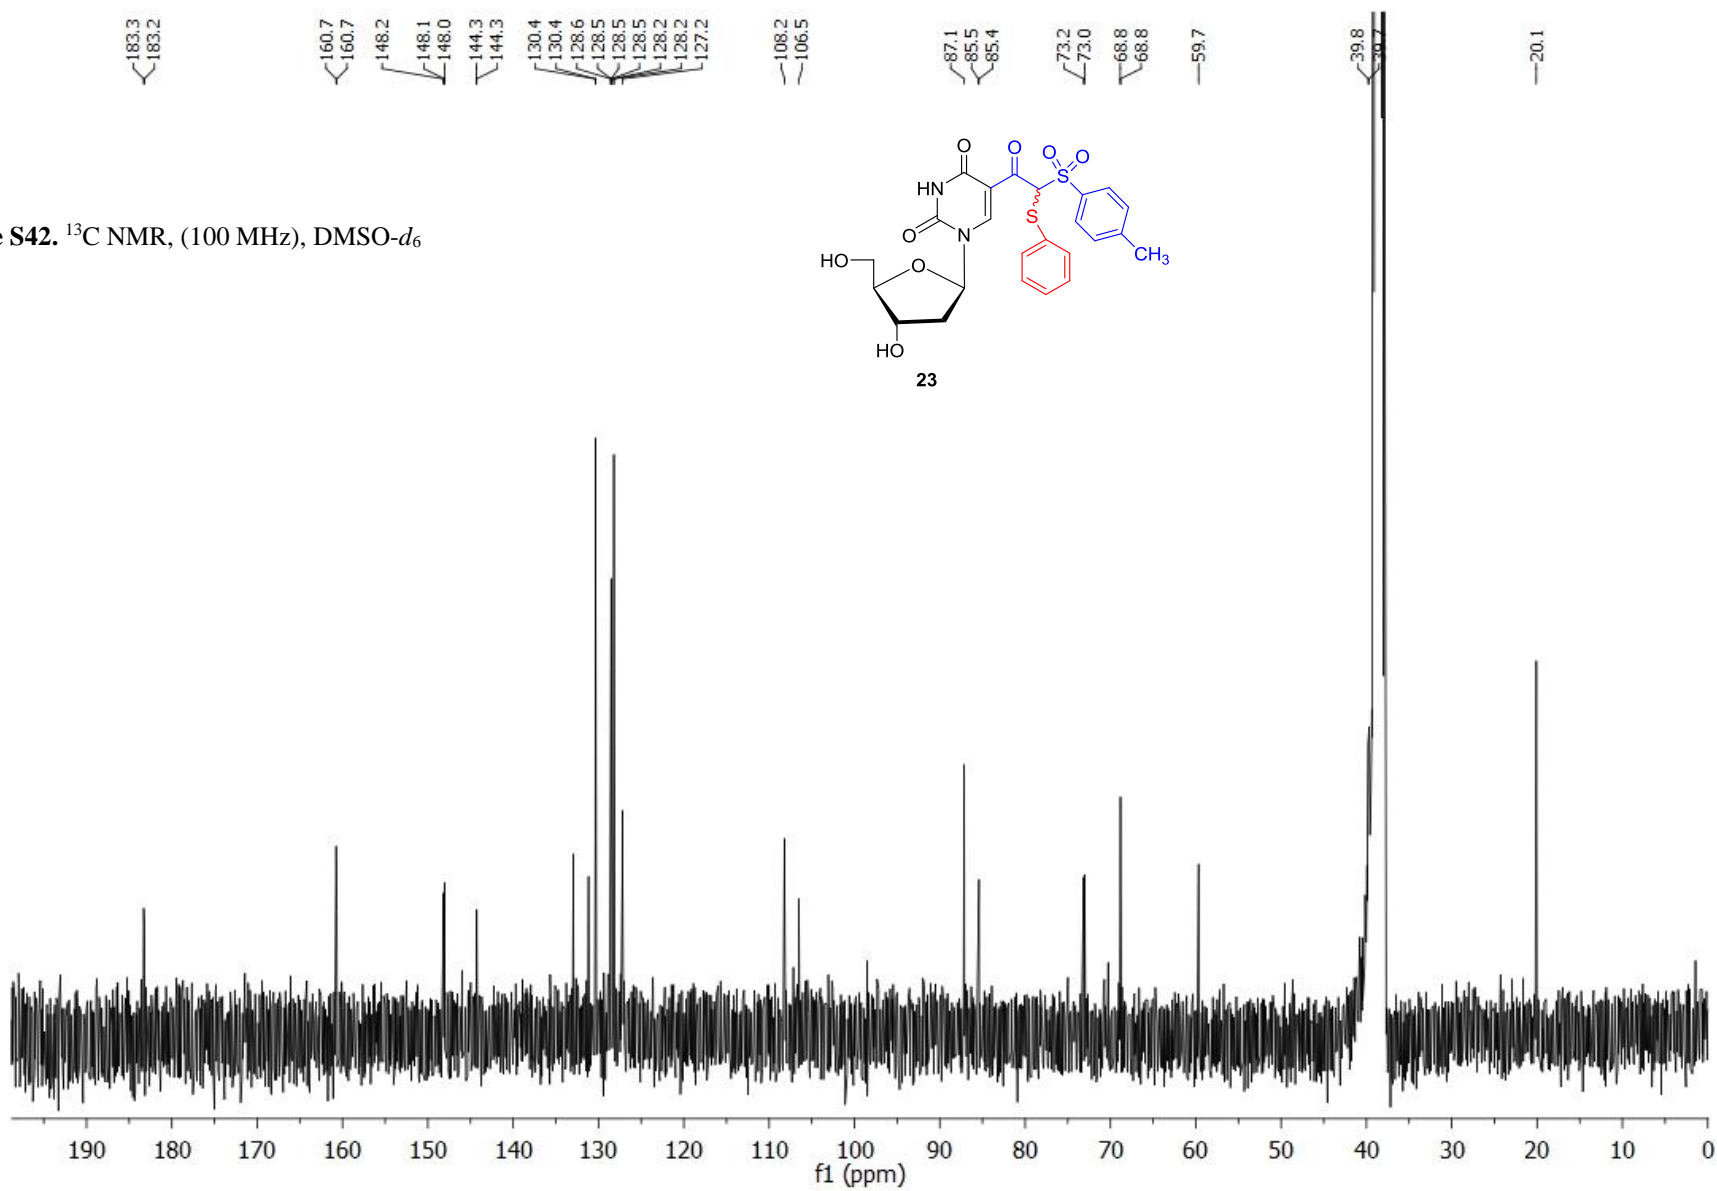

Figure S43. <sup>1</sup>H NMR, (400 MHz), DMSO-d<sub>6</sub>

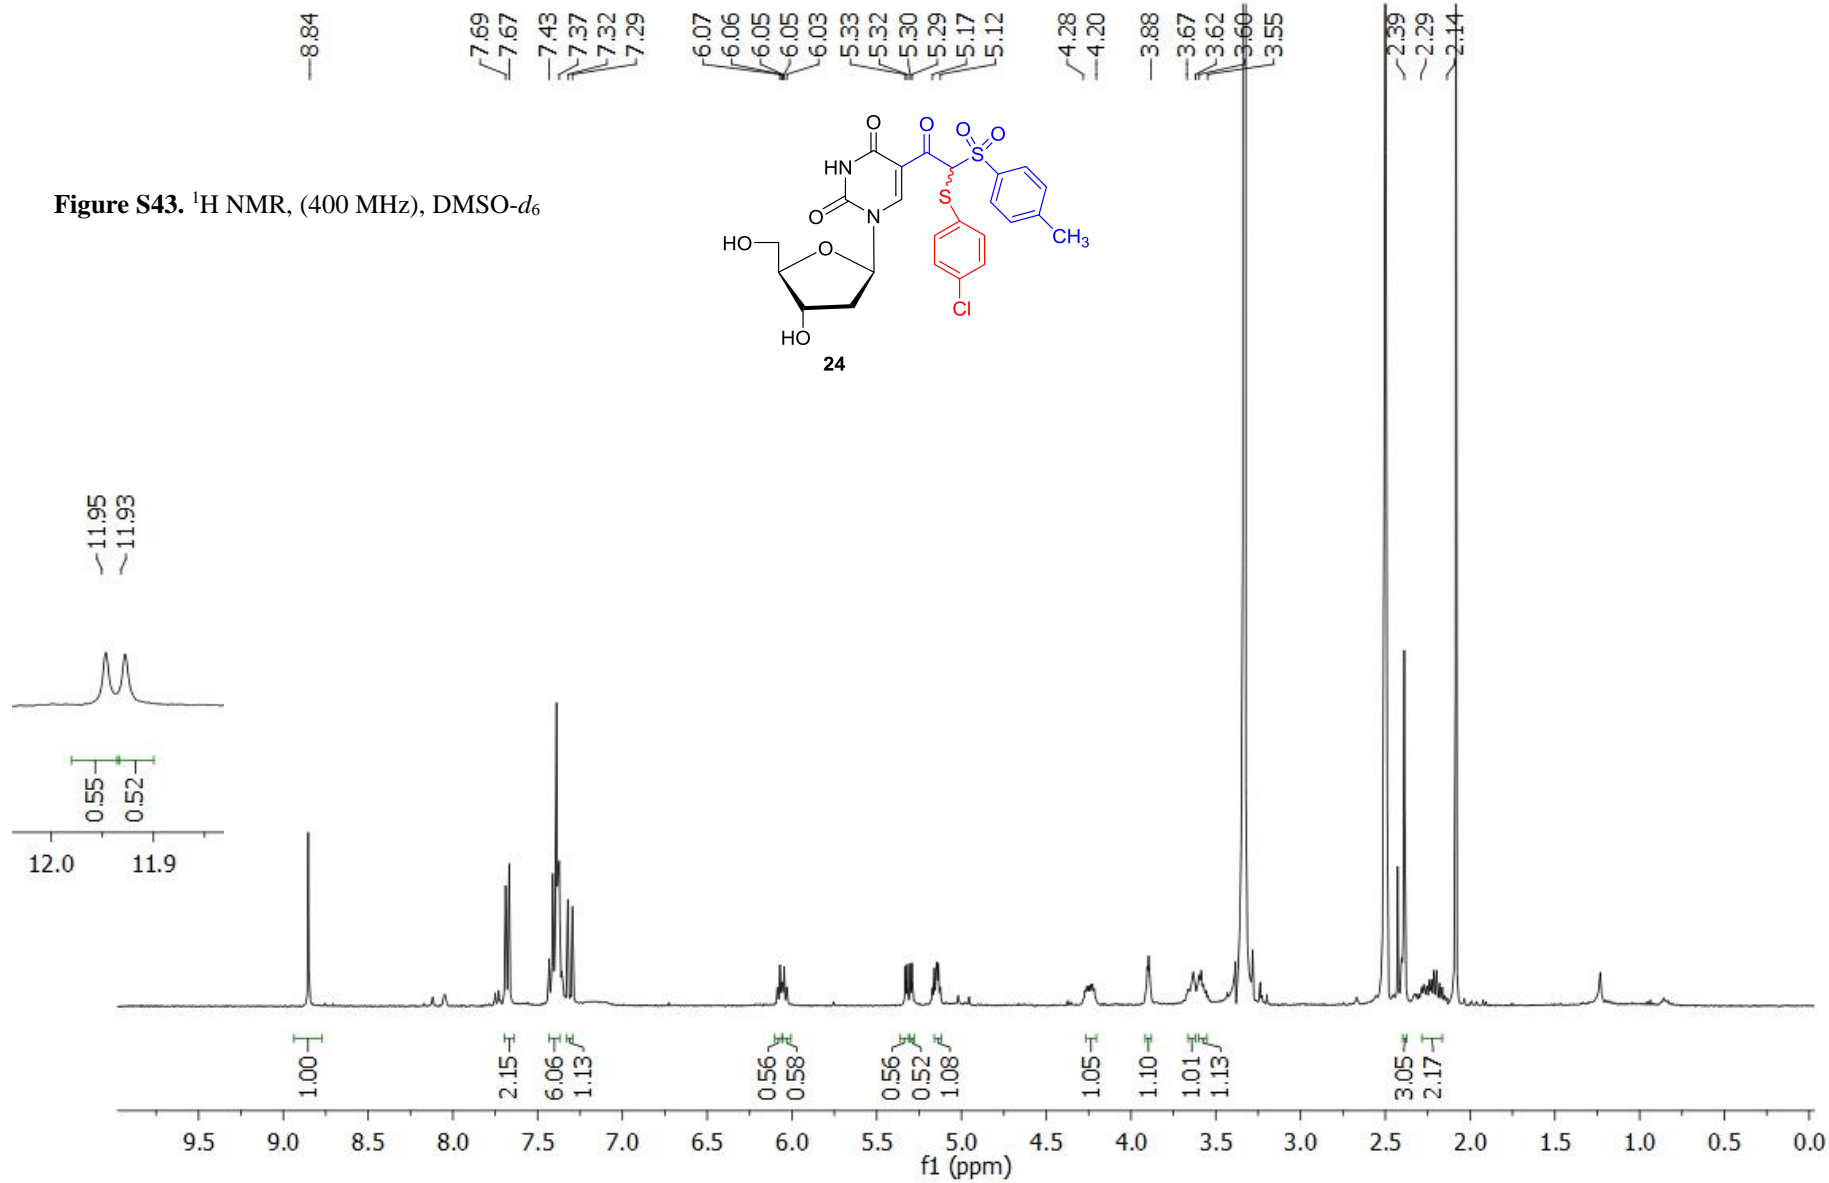

Figure S44.  $^{13}\text{C}$  NMR, (100 MHz),  $\text{DMSO-}d_6$

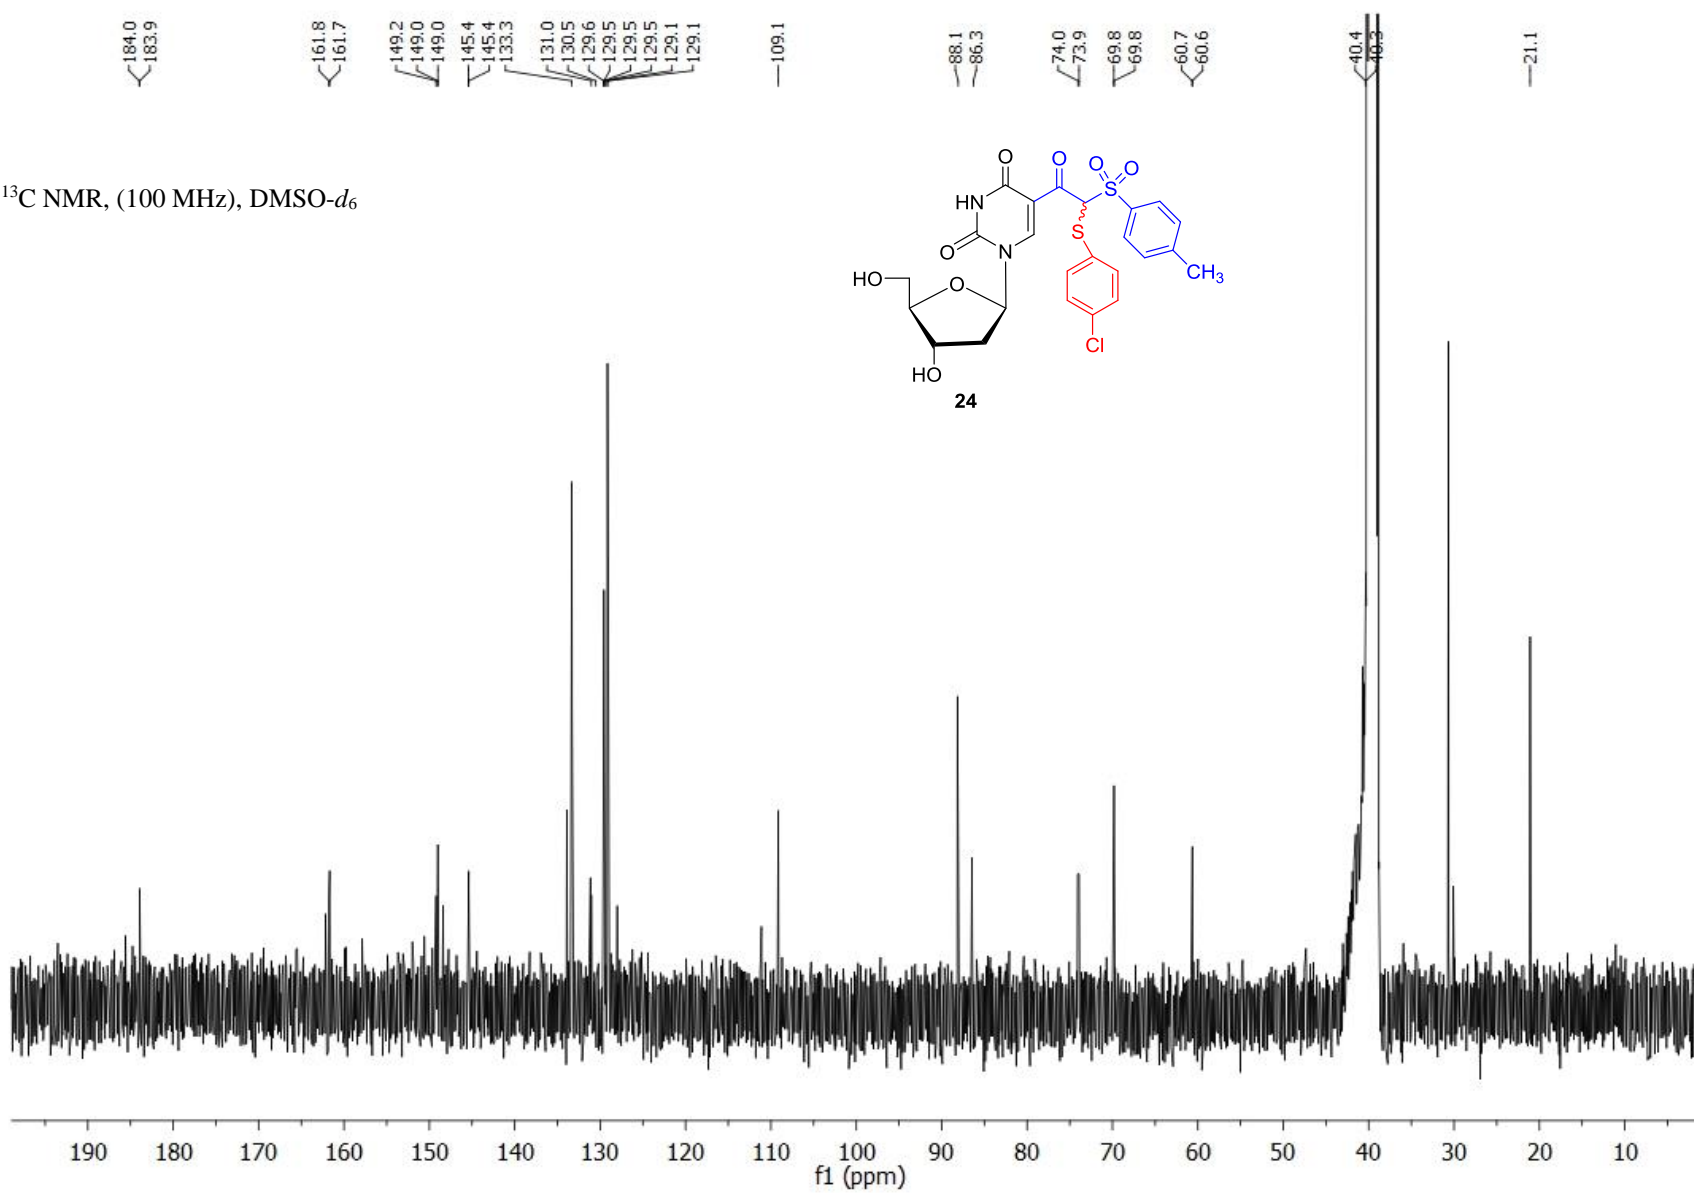

Figure S45. <sup>1</sup>H NMR, (400 MHz), DMSO-d<sub>6</sub>

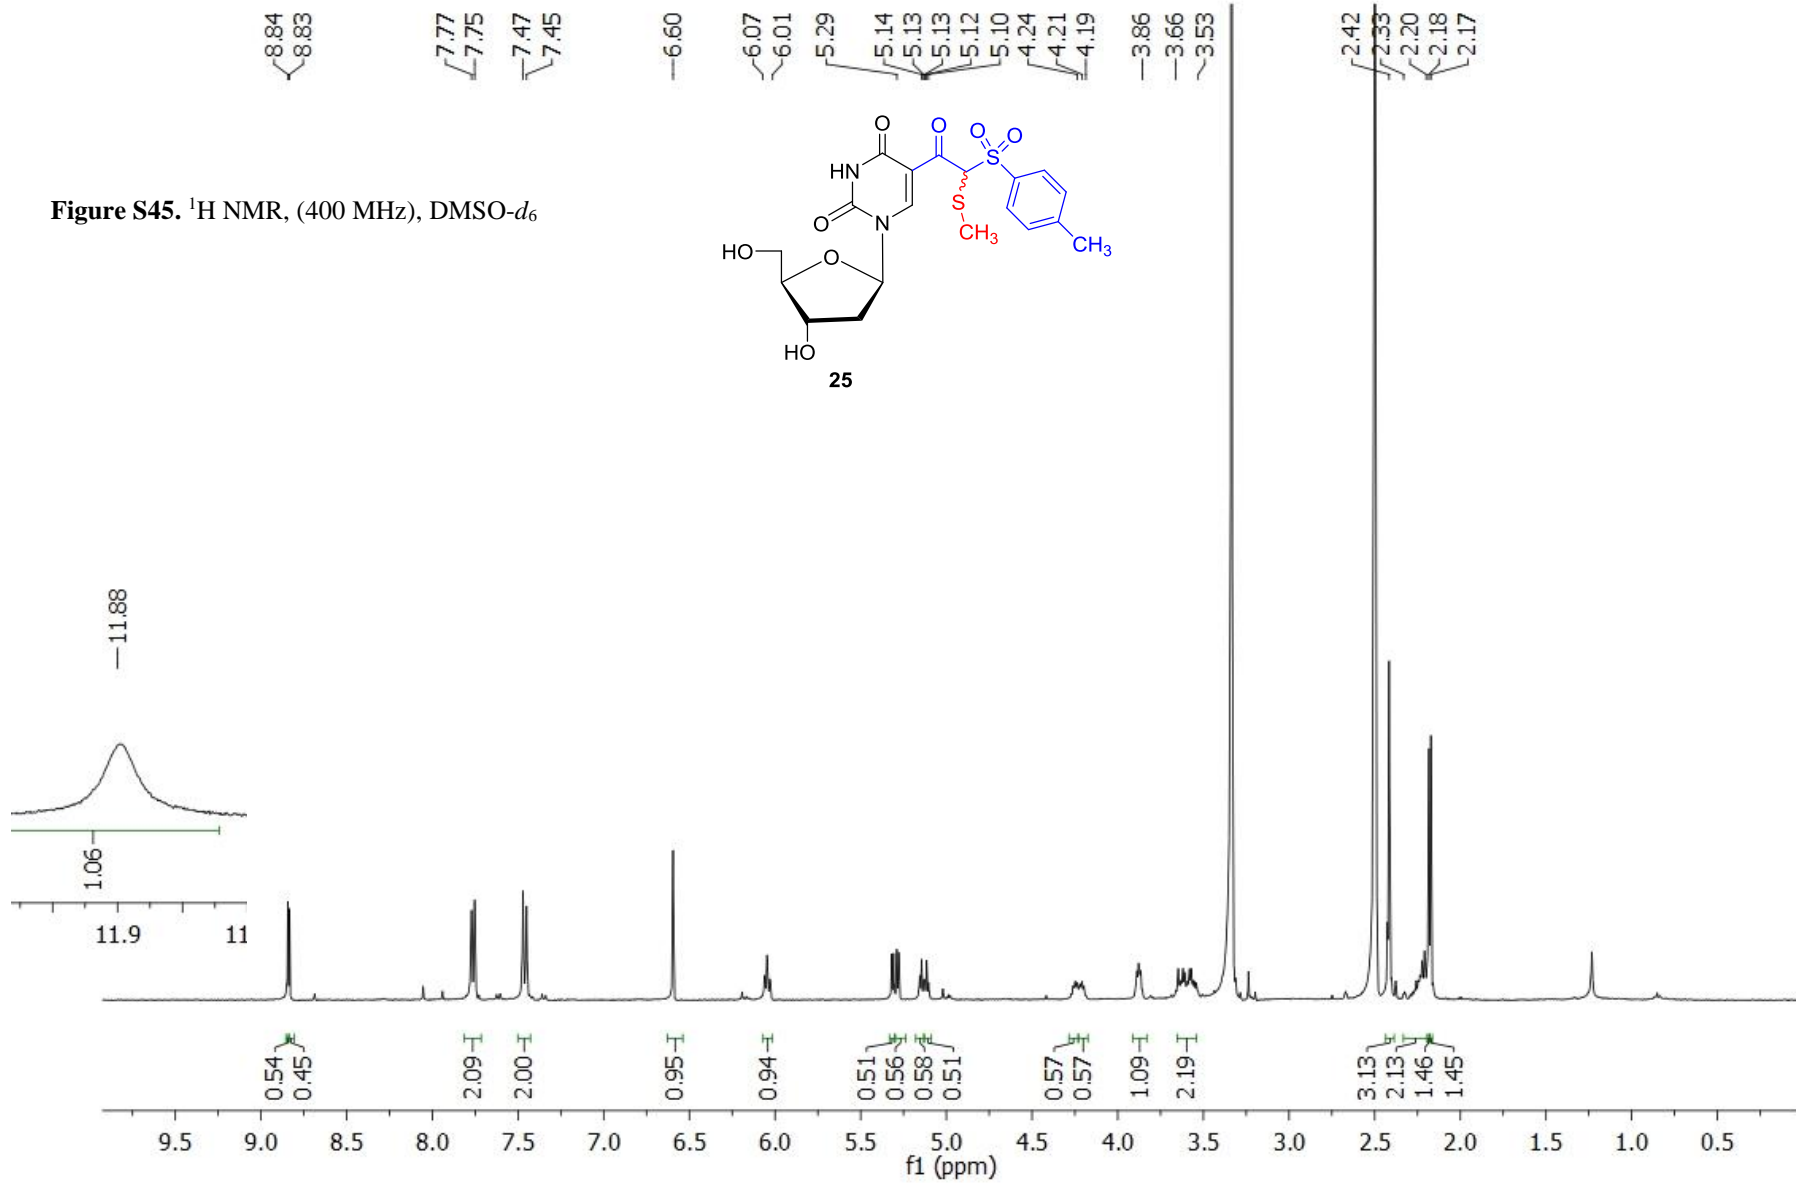

Figure S46.  $^{13}\text{C}$  NMR, (100 MHz),  $\text{DMSO-}d_6$

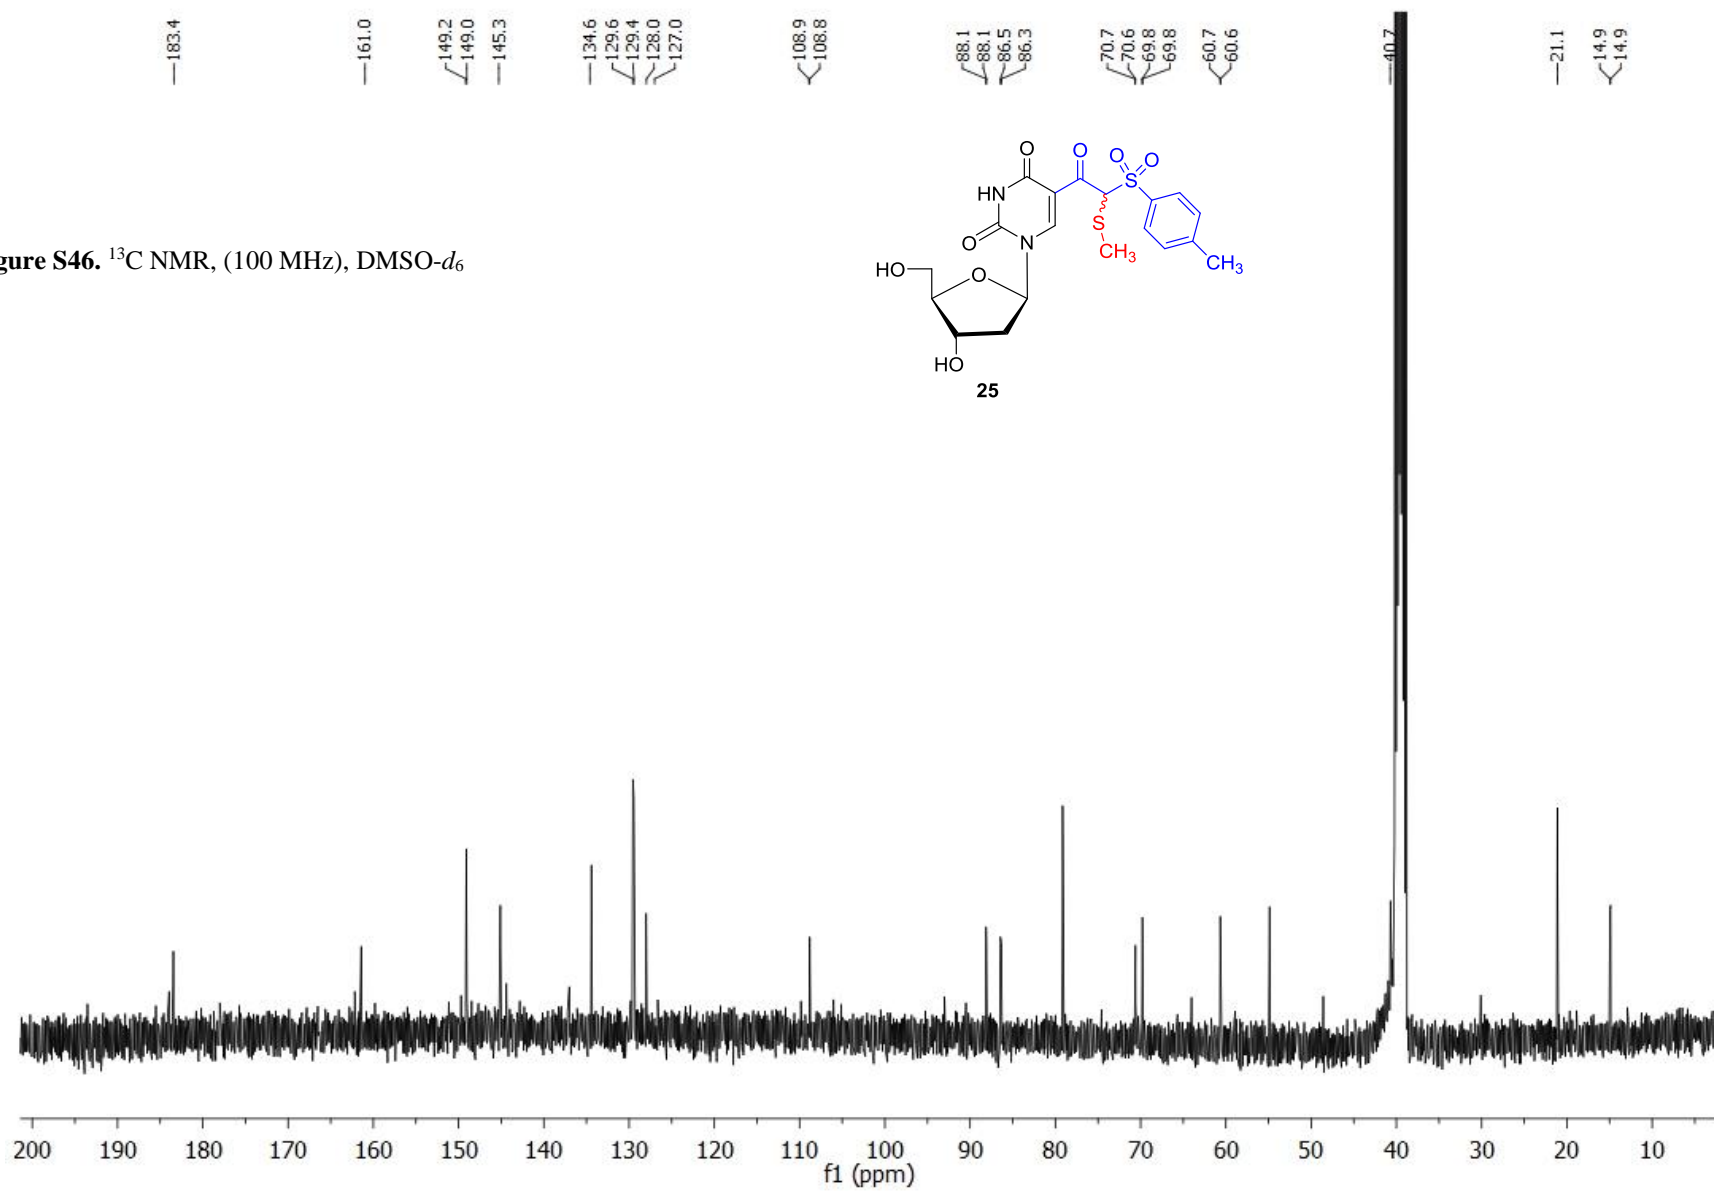

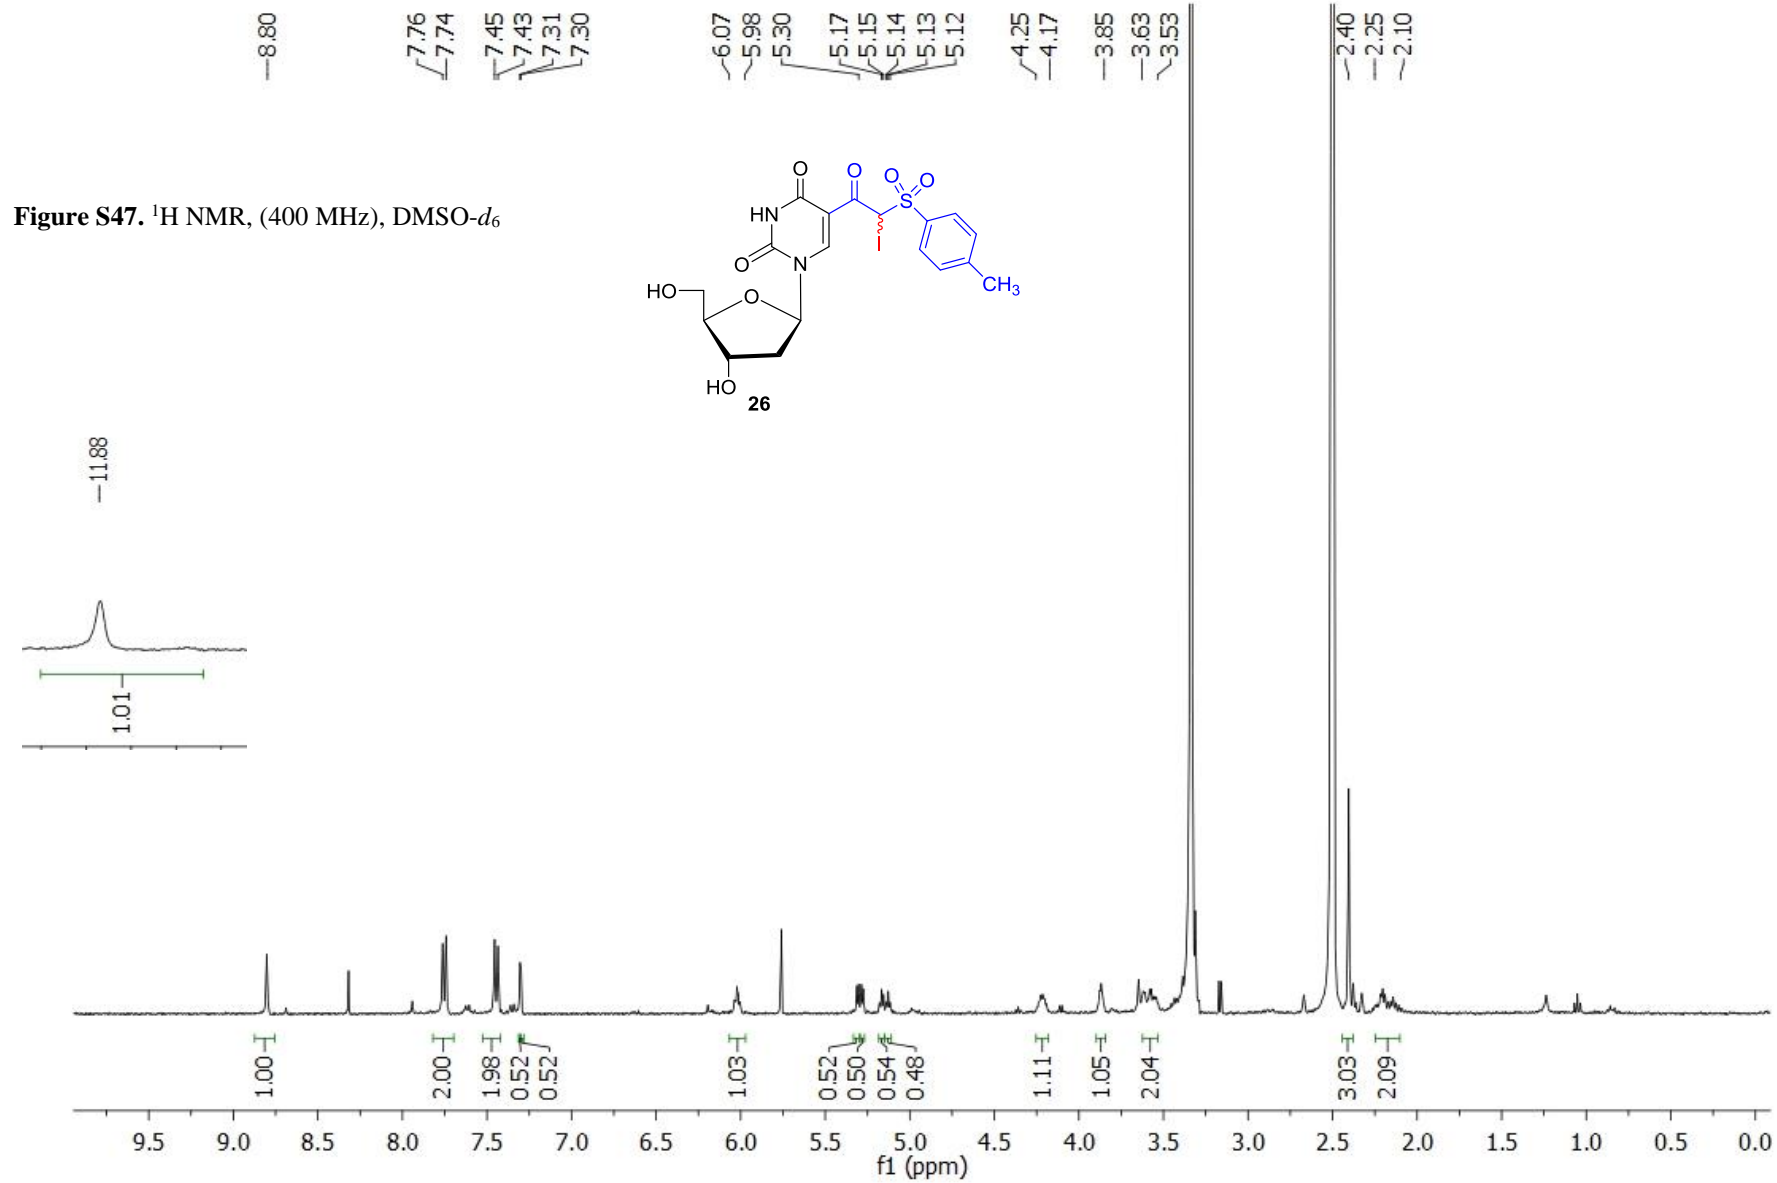



Figure S48.  $^{13}\text{C}$  NMR, (100 MHz),  $\text{DMSO-}d_6$

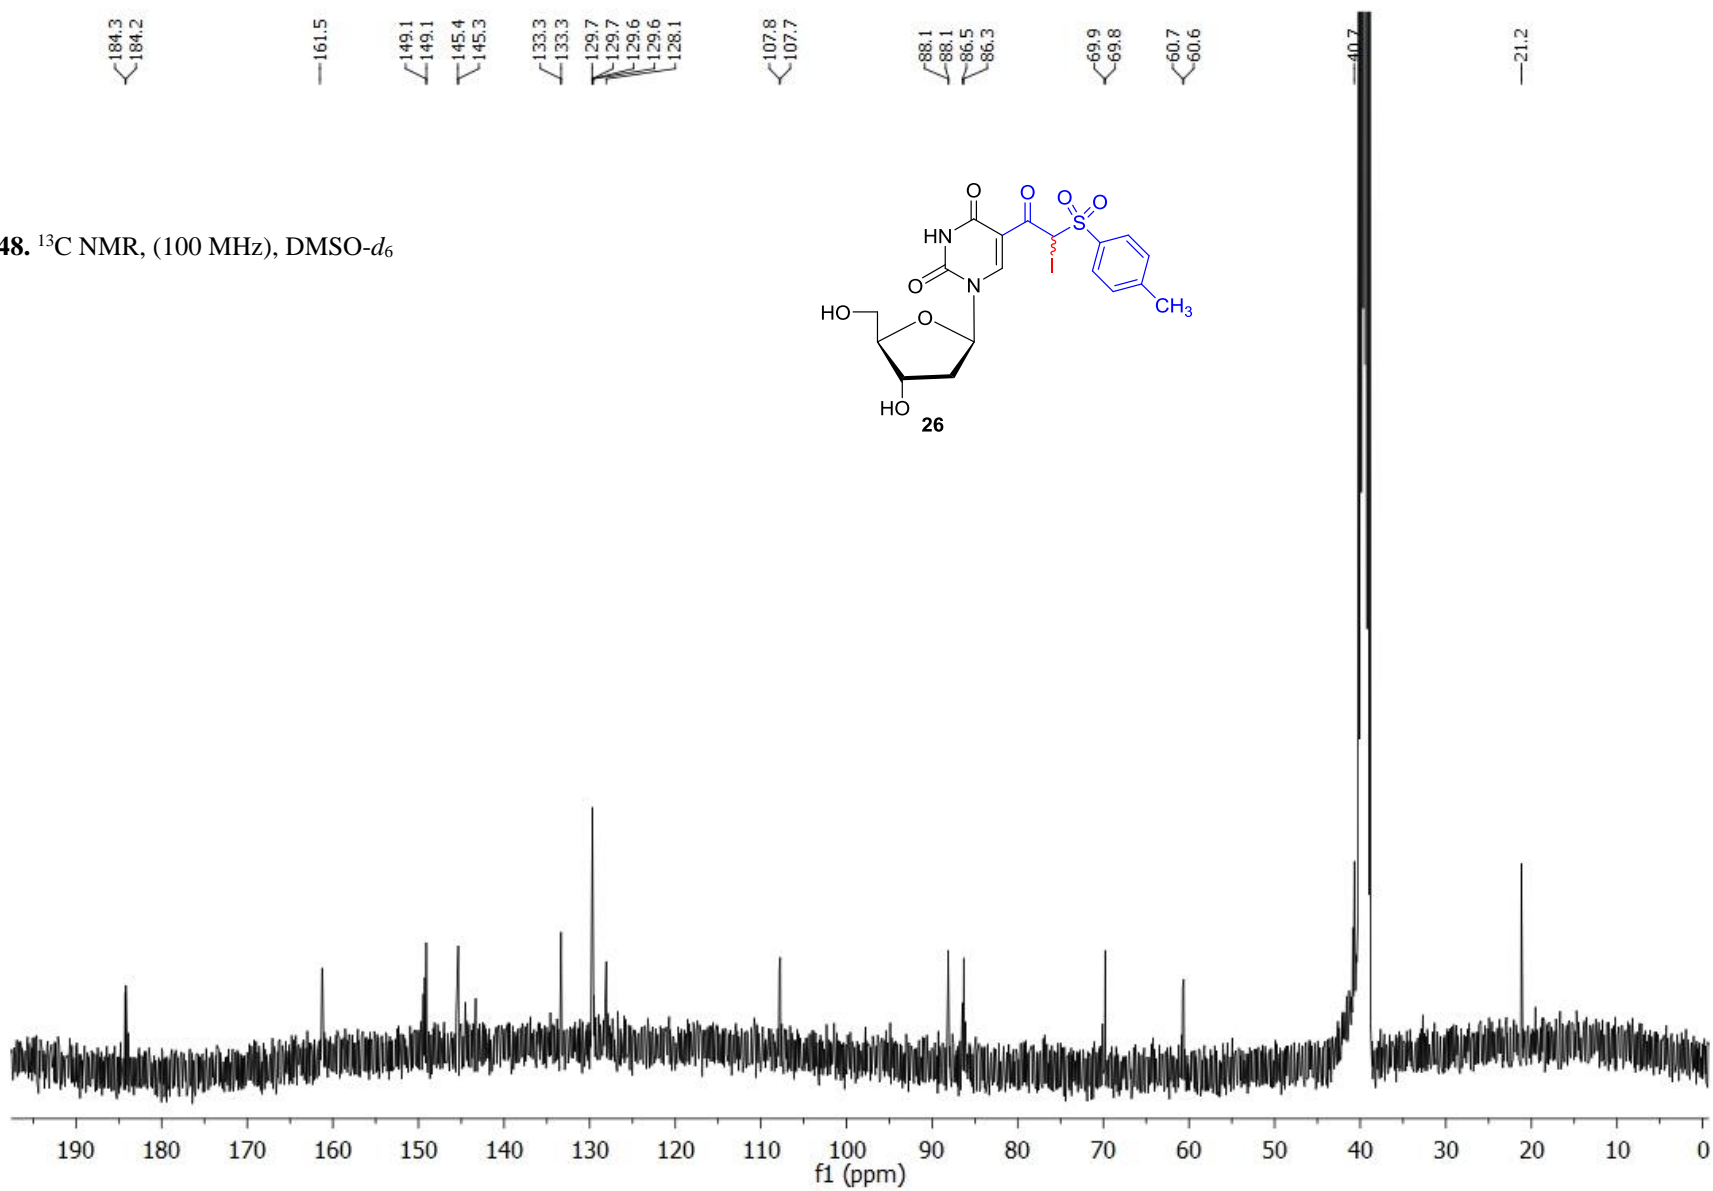

Figure S49. <sup>1</sup>H NMR, (400 MHz), DMSO-*d*<sub>6</sub>

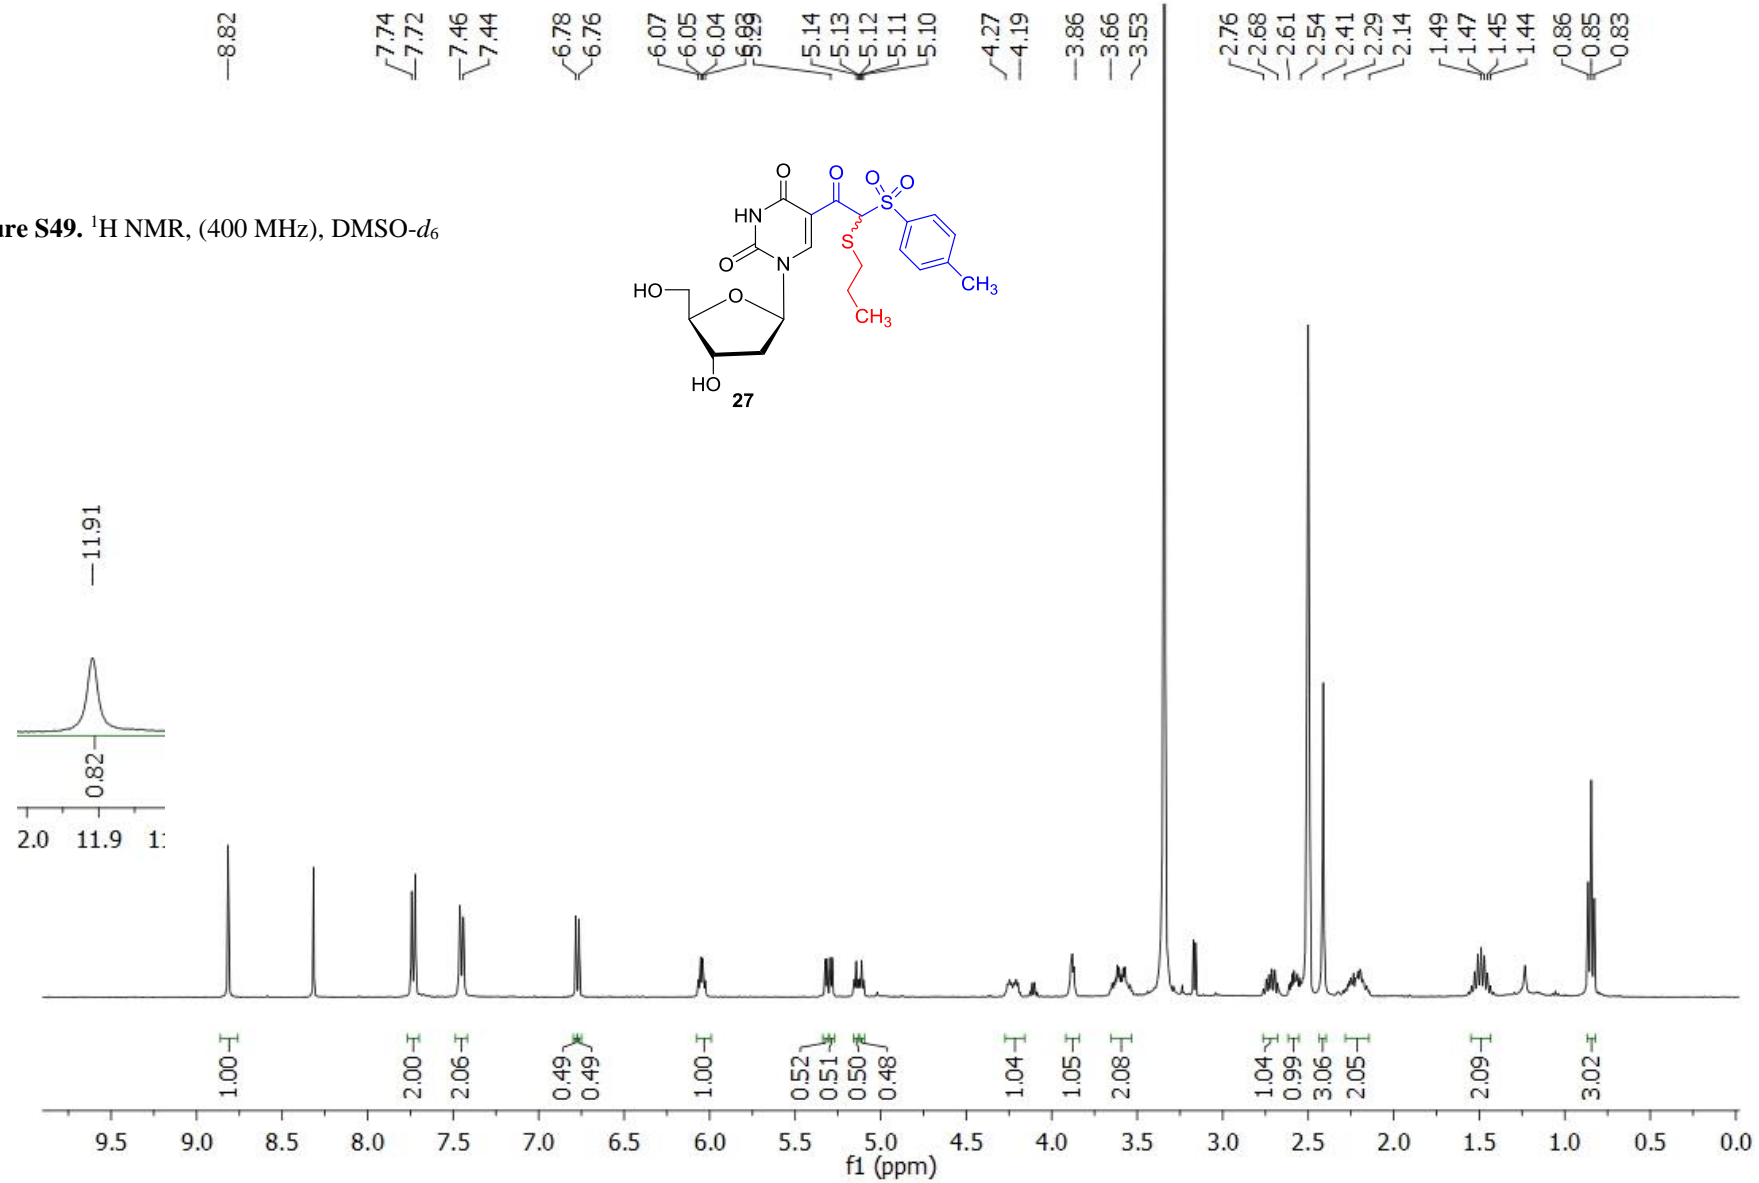

Figure S50.  $^{13}\text{C}$  NMR, (100 MHz),  $\text{DMSO-}d_6$

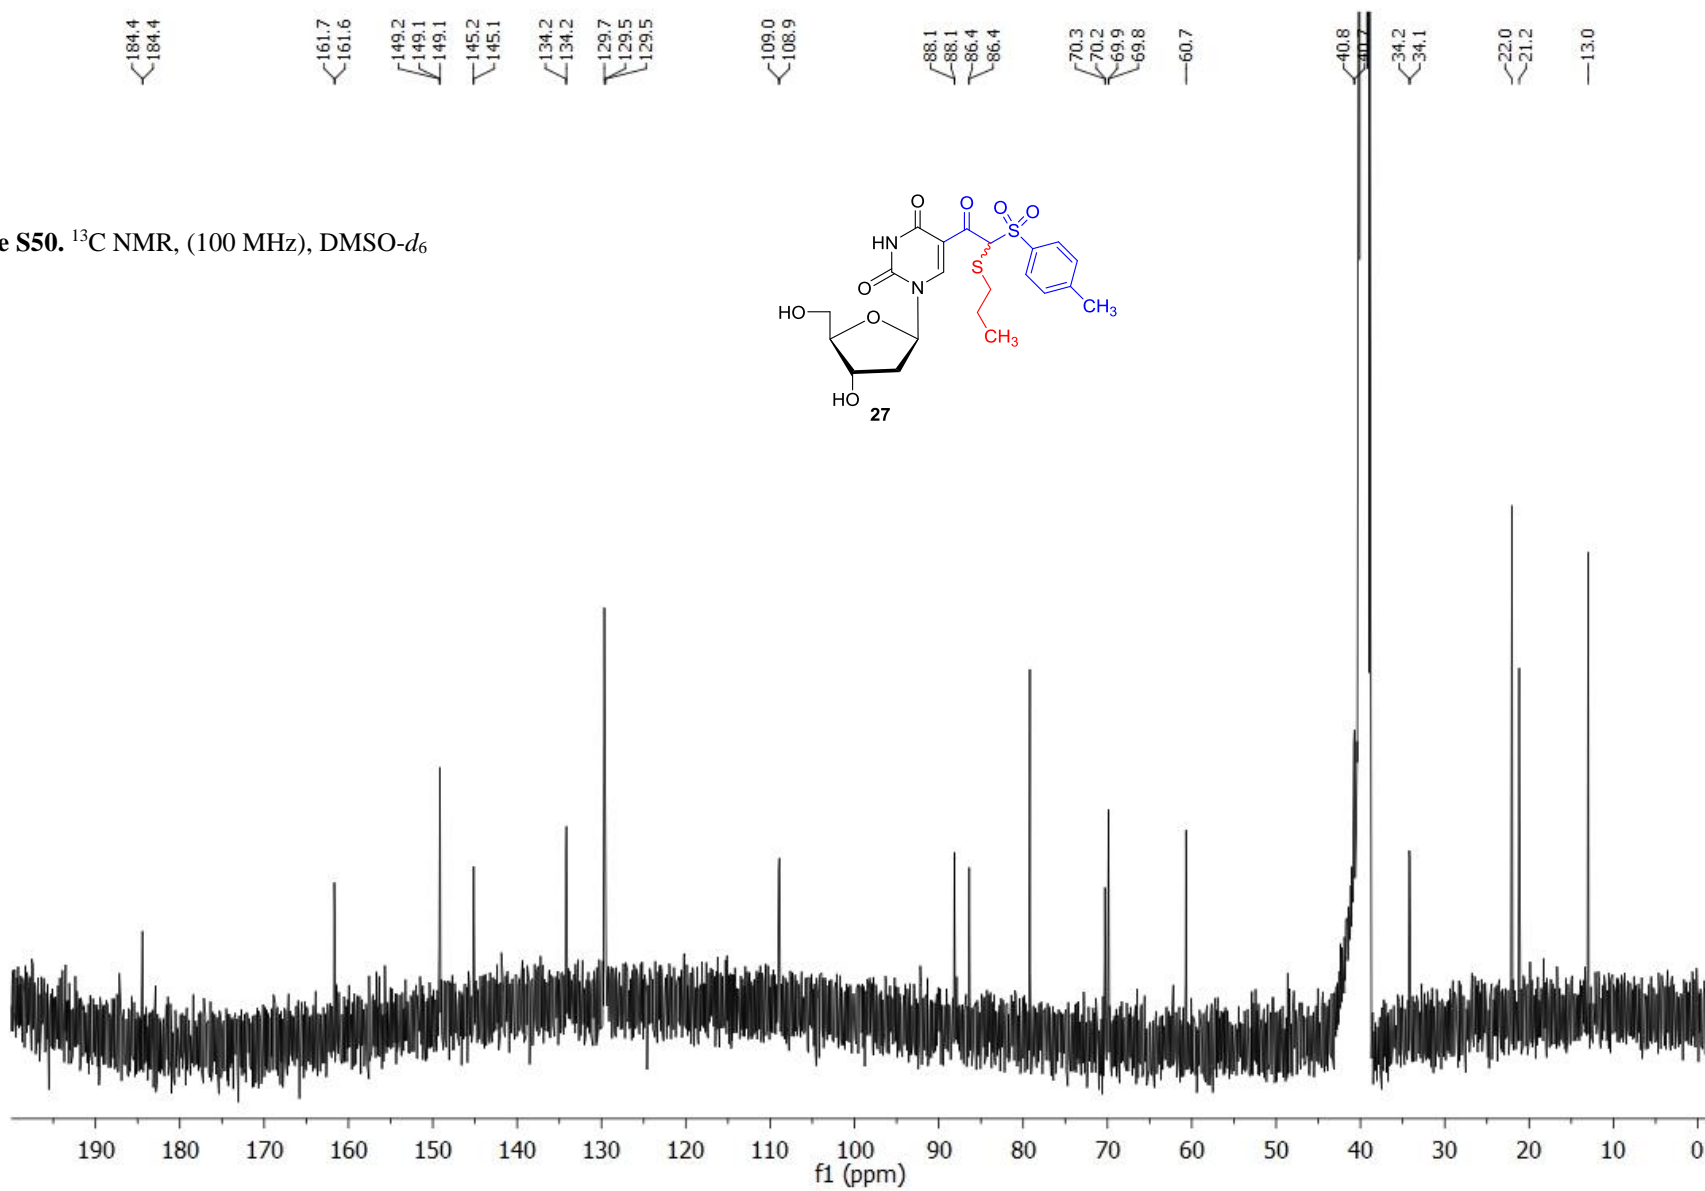

Figure S51. <sup>1</sup>H NMR, (400 MHz), D<sub>2</sub>O

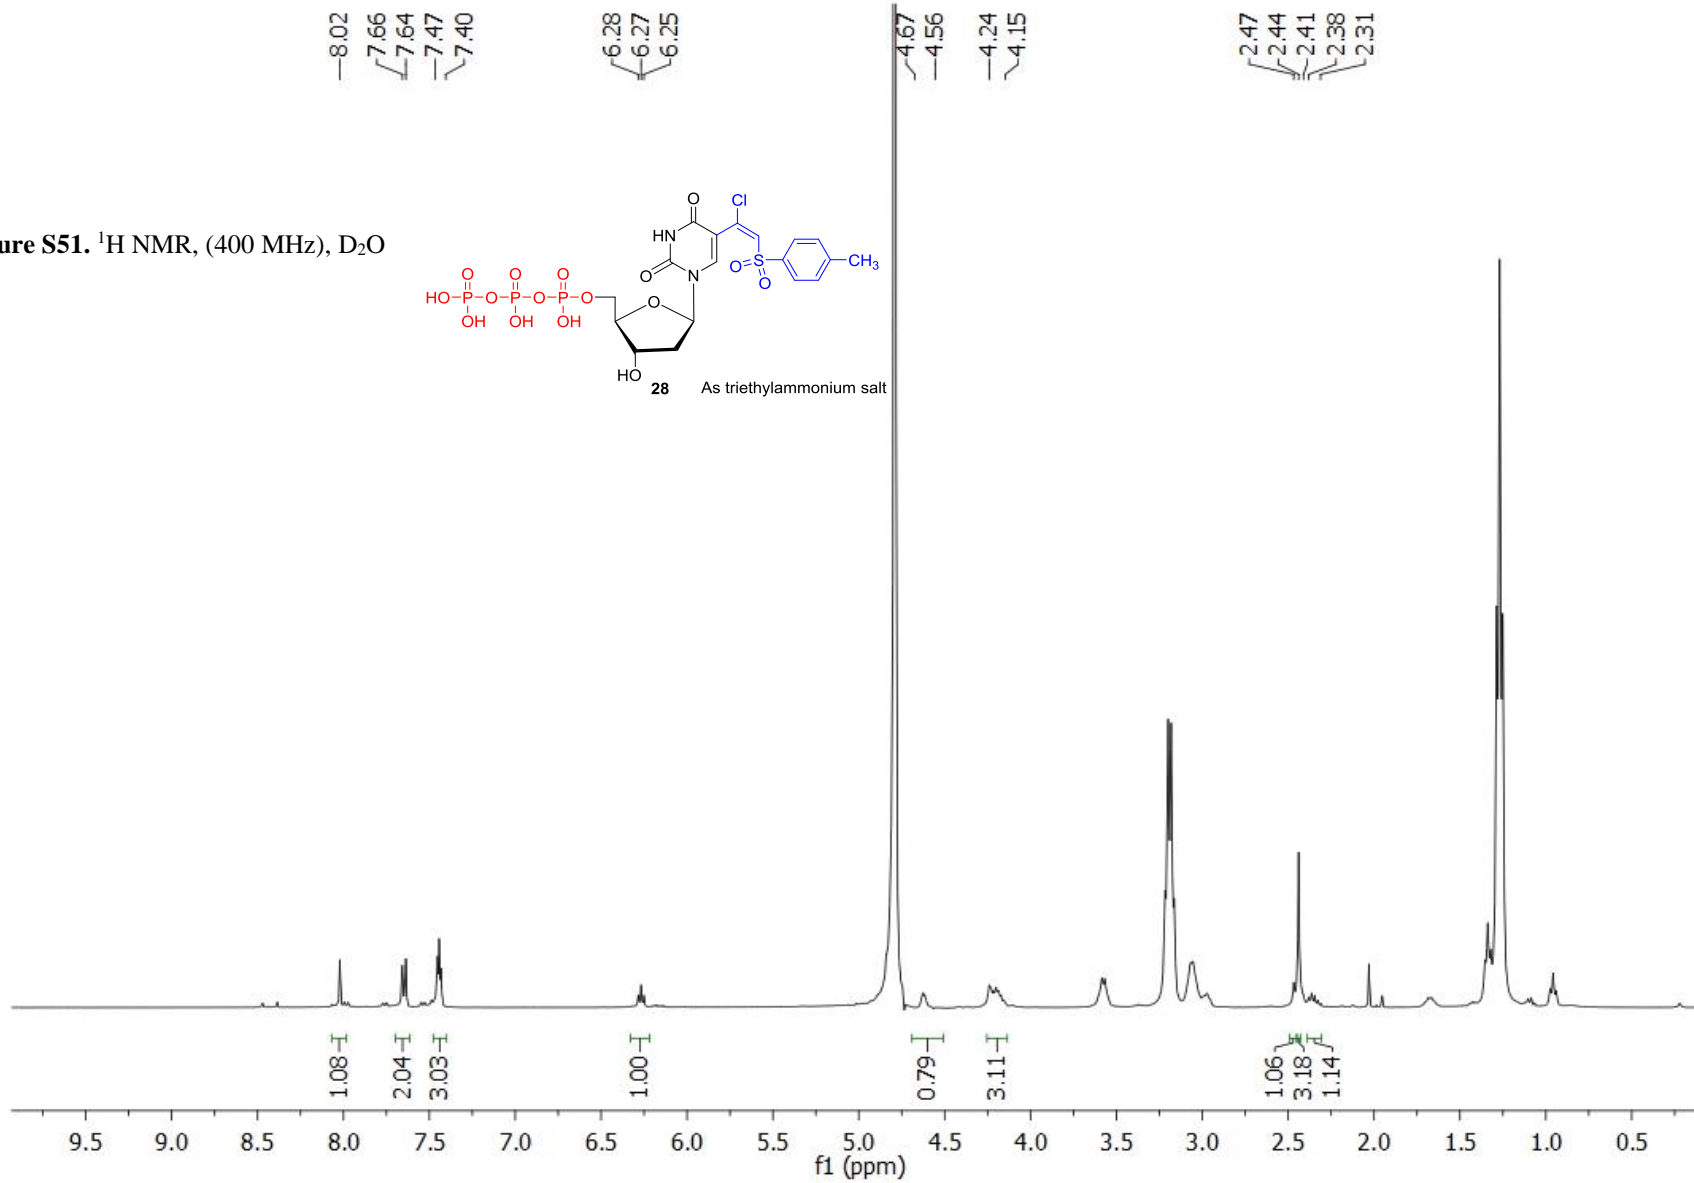

Figure S52.  $^{13}\text{C}$  NMR, (100 MHz),  $\text{D}_2\text{O}$

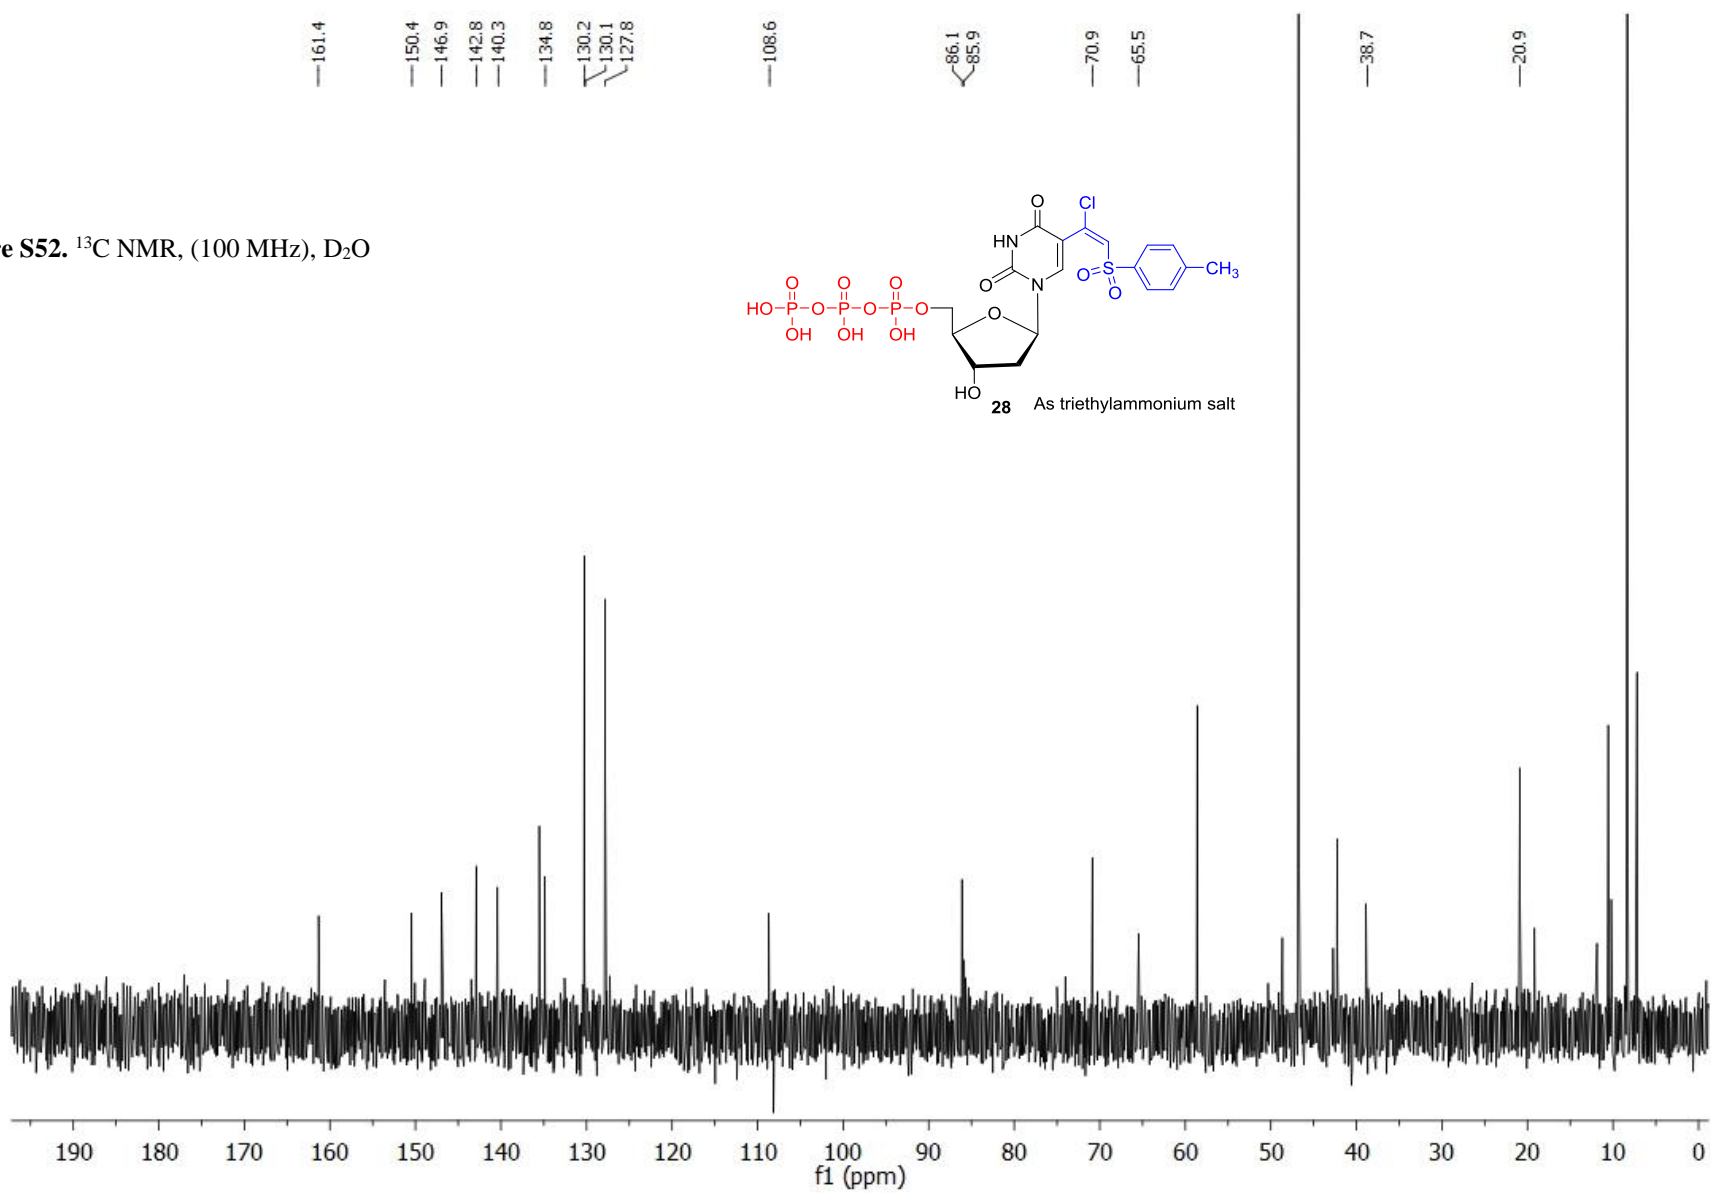

Figure S53.  $^{31}\text{P}$  NMR, (162 MHz),  $\text{D}_2\text{O}$

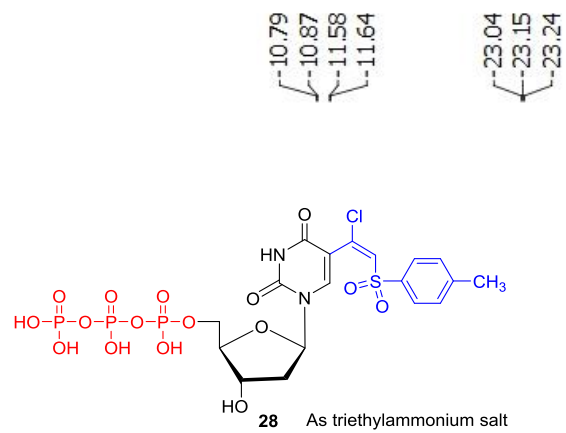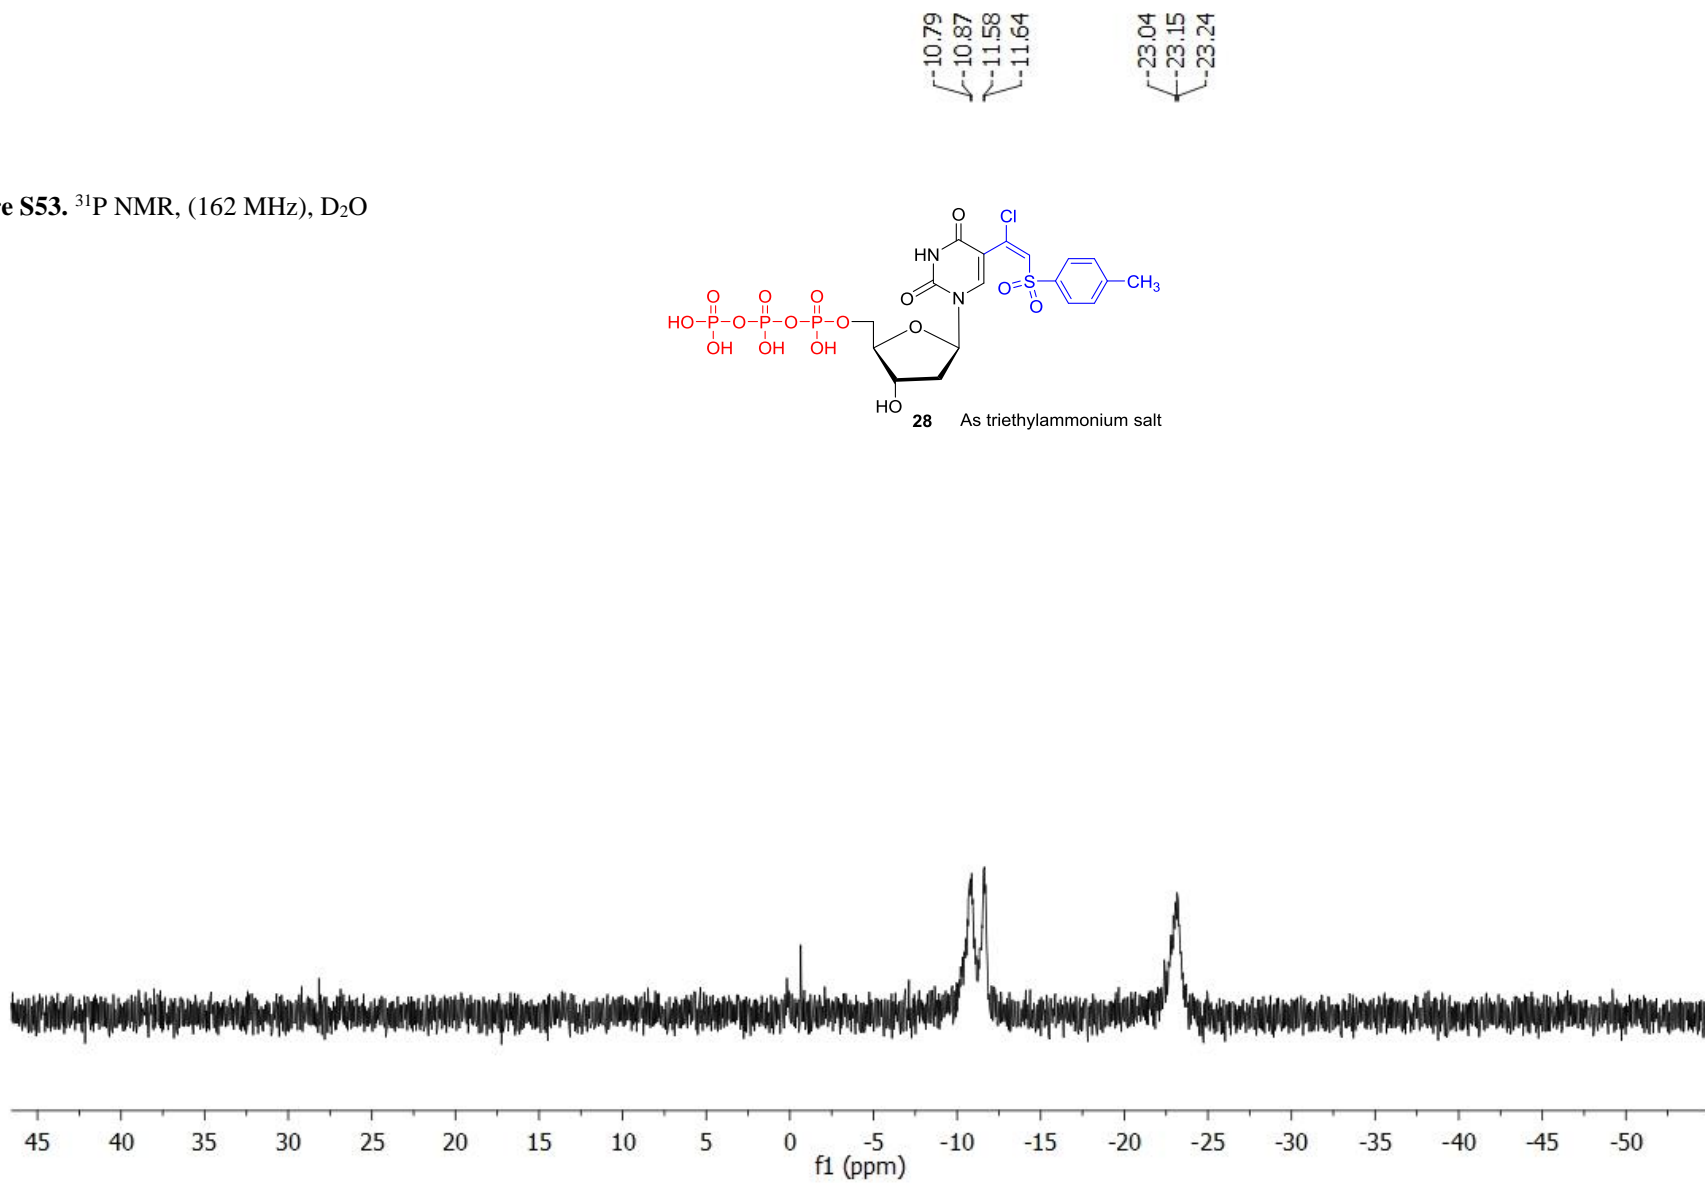

Figure S54. <sup>1</sup>H NMR, (400 MHz), D<sub>2</sub>O

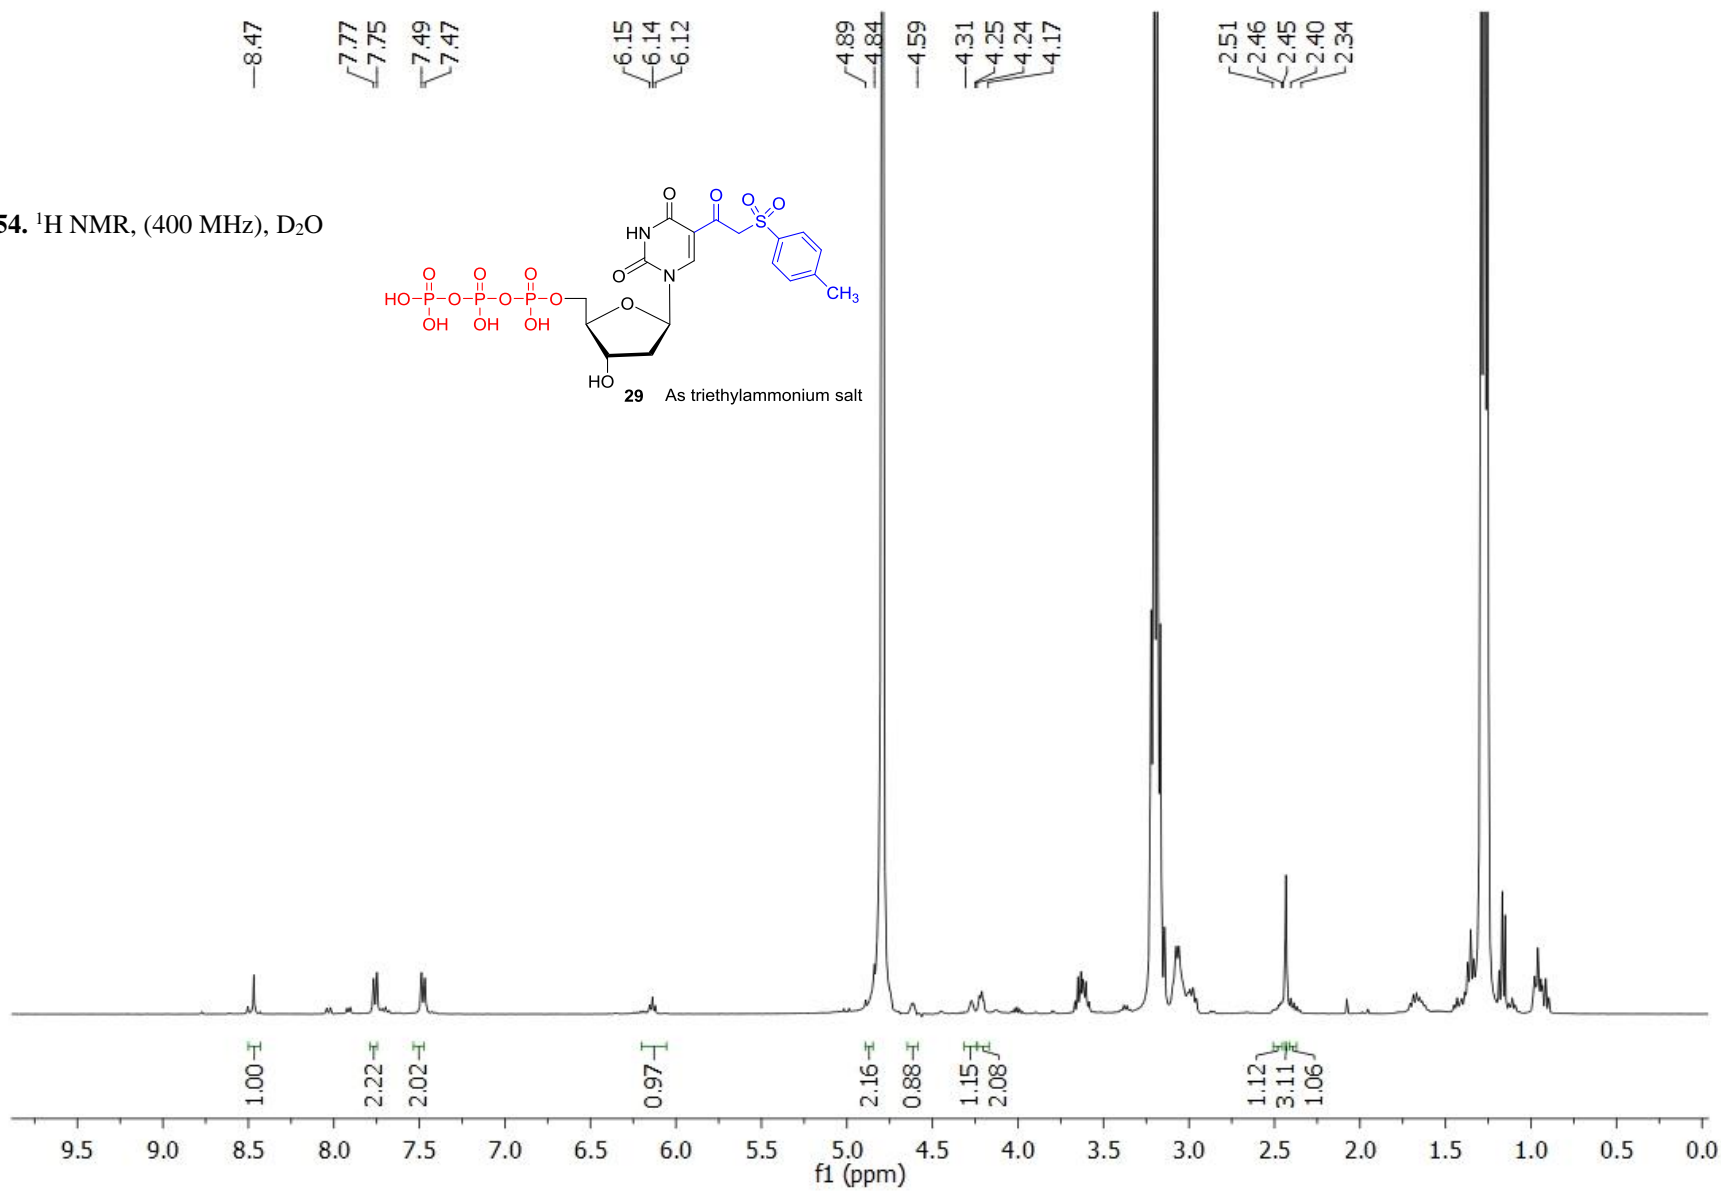

Figure S55. <sup>13</sup>C NMR, (100 MHz), D<sub>2</sub>O

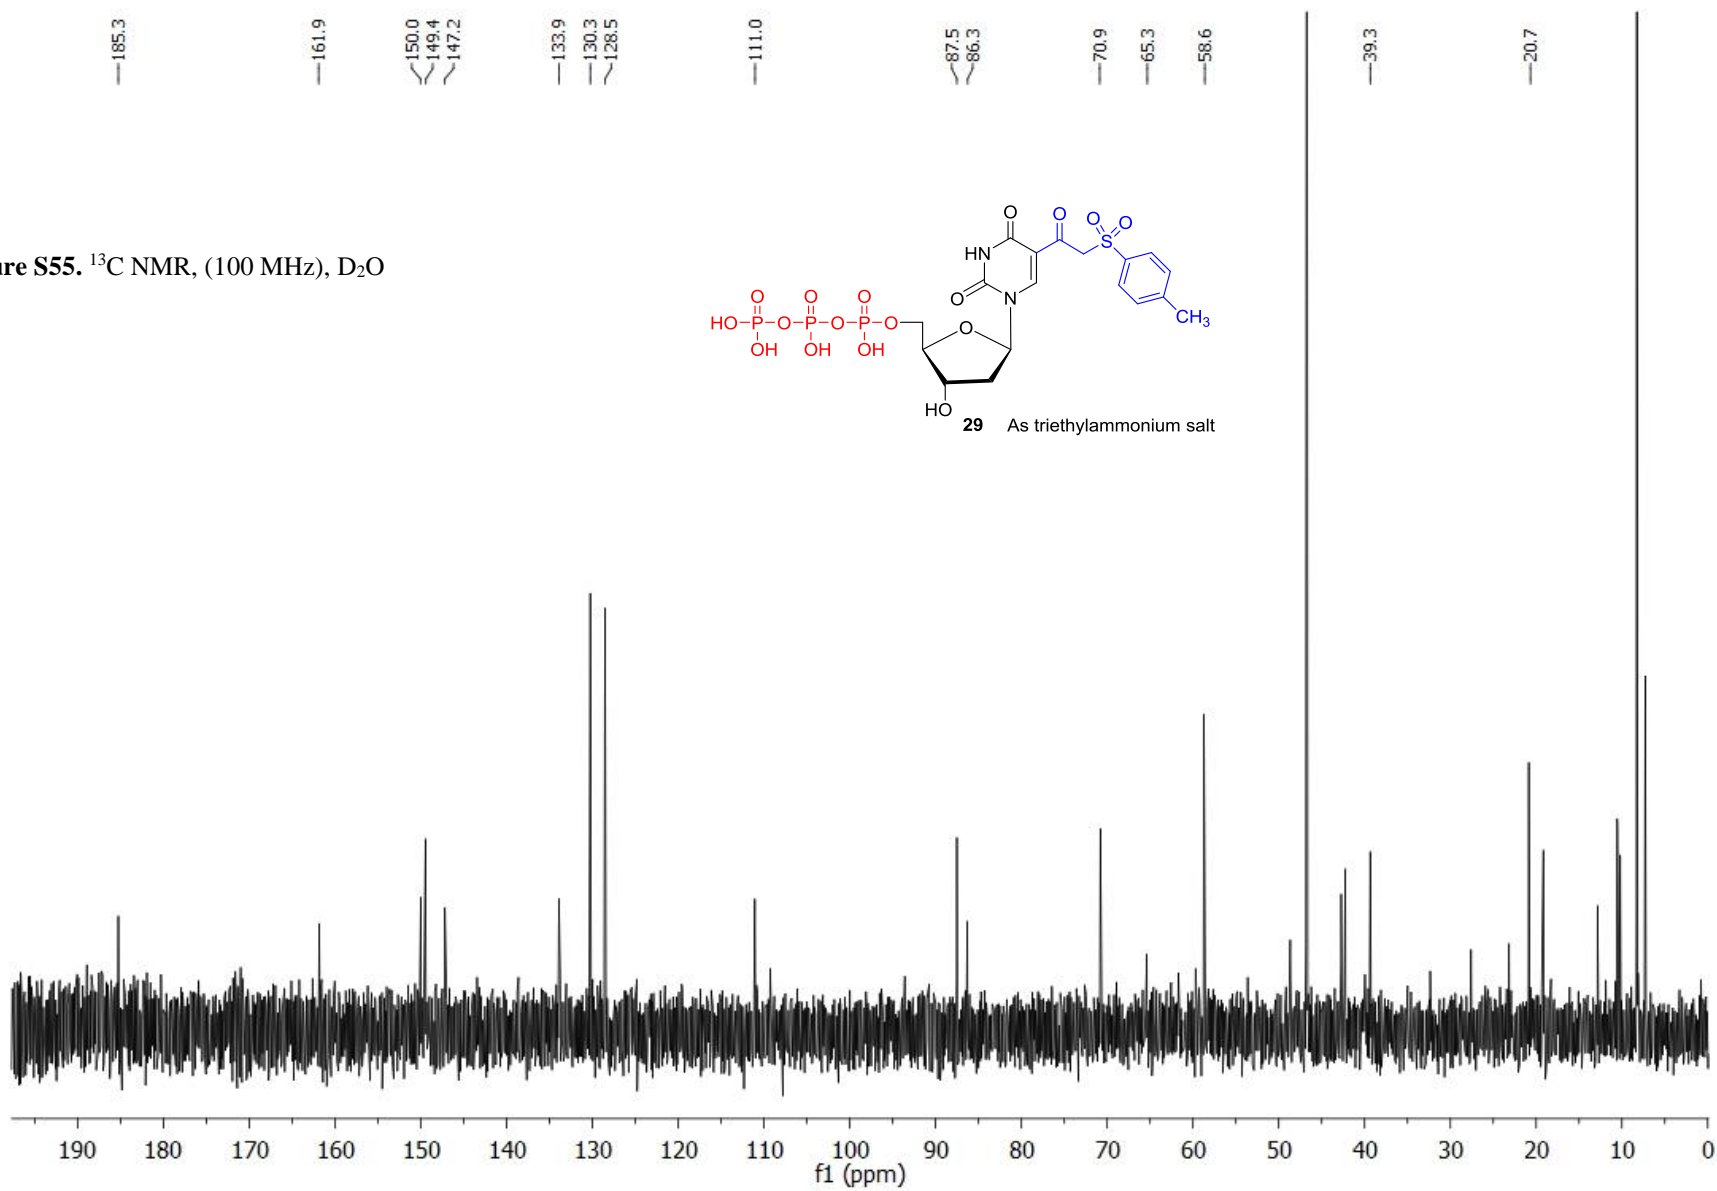



-10.91  
-11.02  
-11.55  
-11.67  
  
-23.23  
-23.34  
-23.48

Figure S56. <sup>31</sup>P NMR, (162 MHz), D<sub>2</sub>O

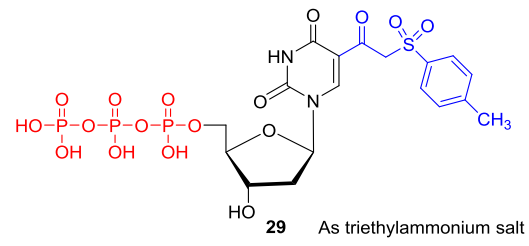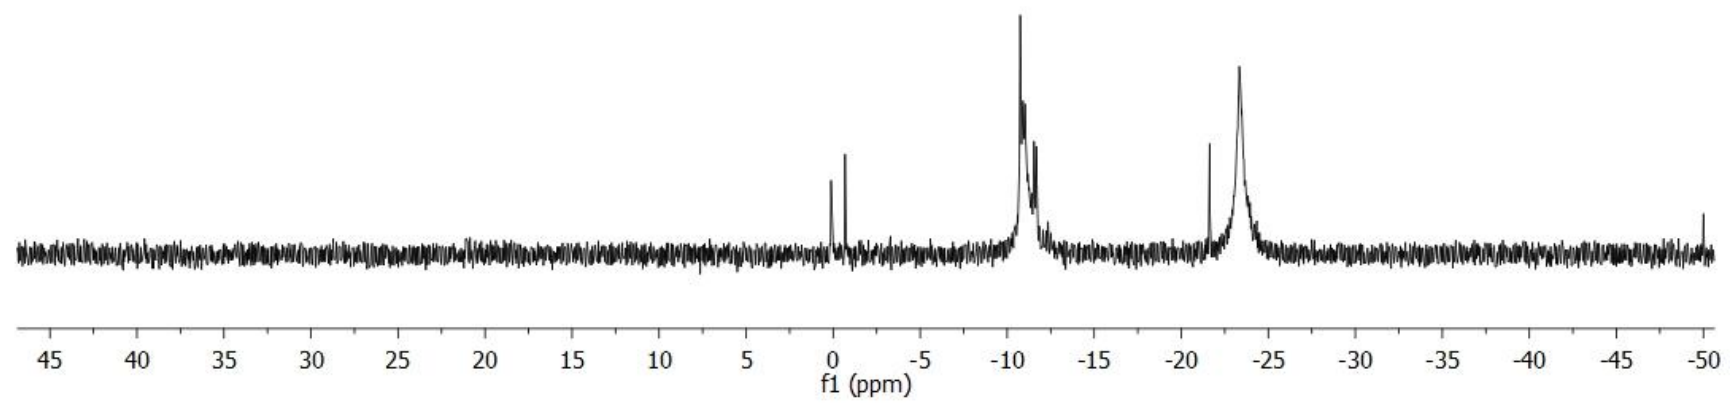

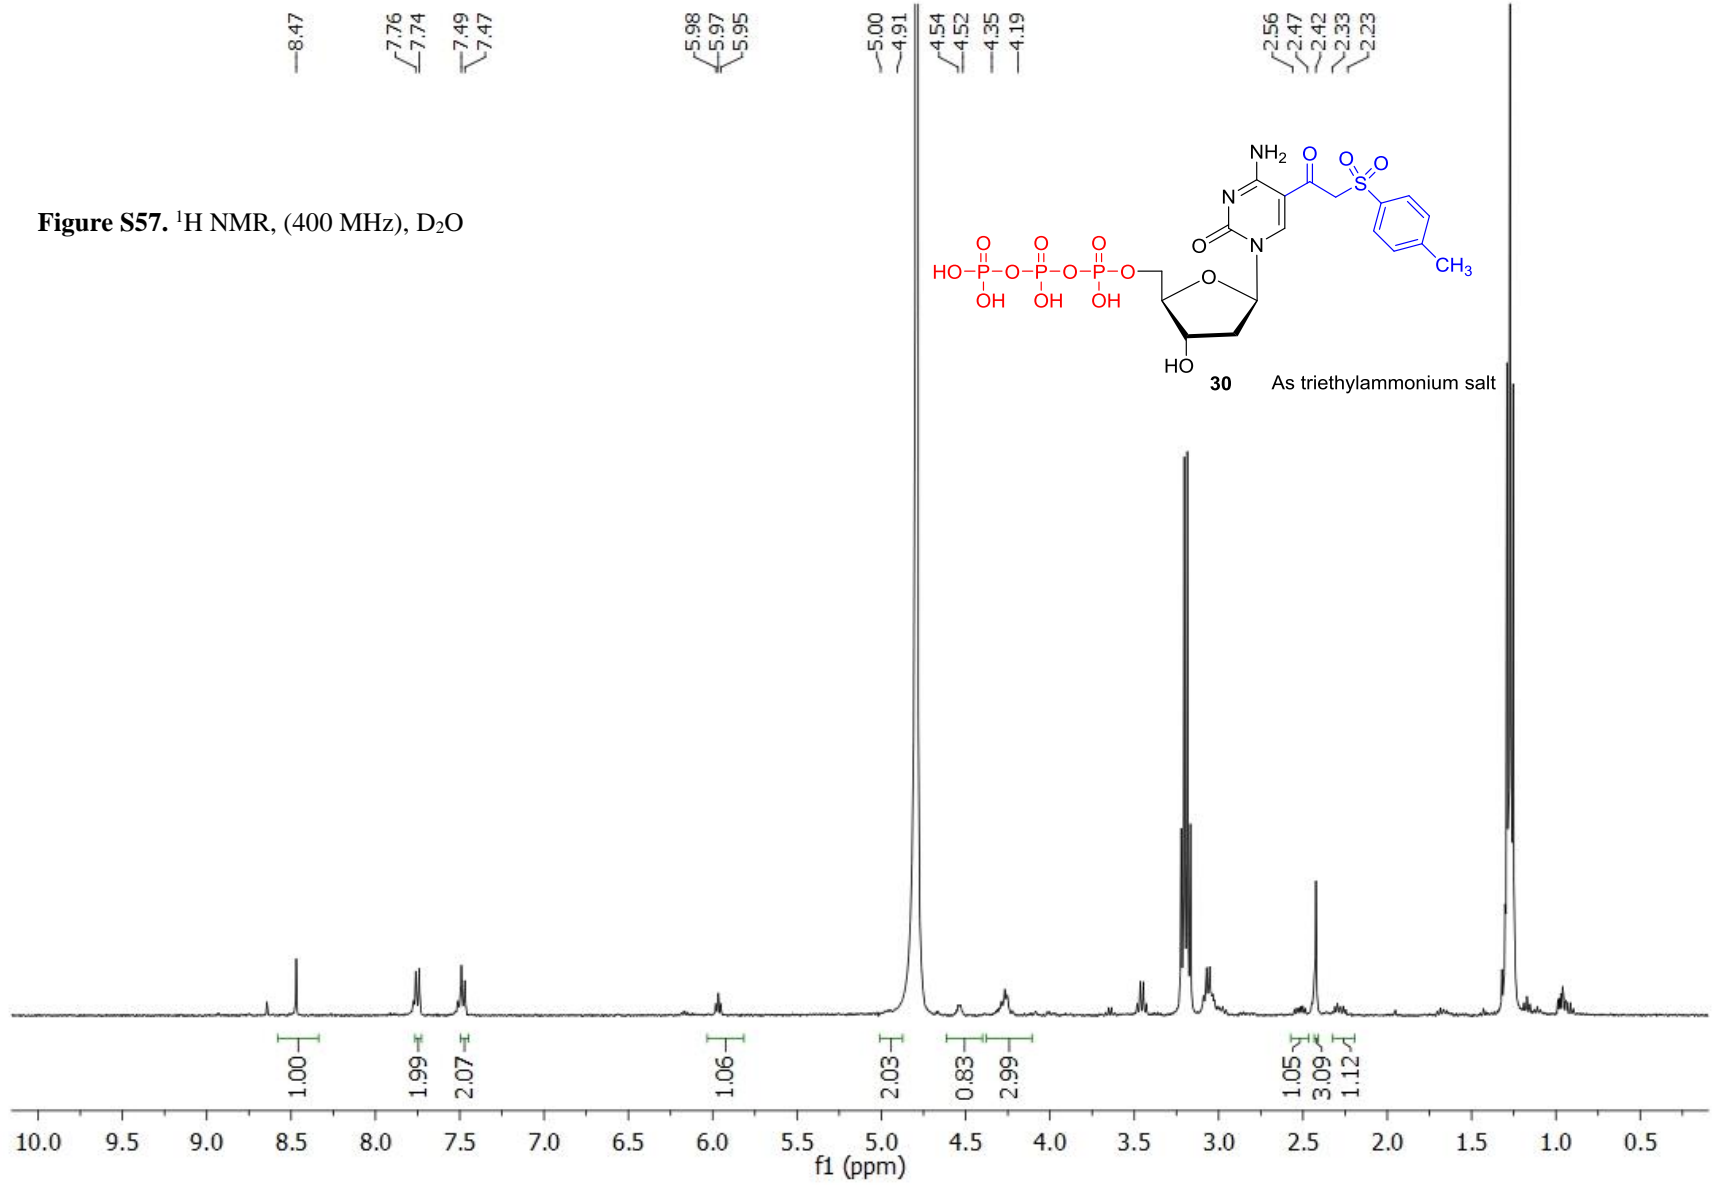

Figure S58. <sup>13</sup>C NMR, (100 MHz), D<sub>2</sub>O

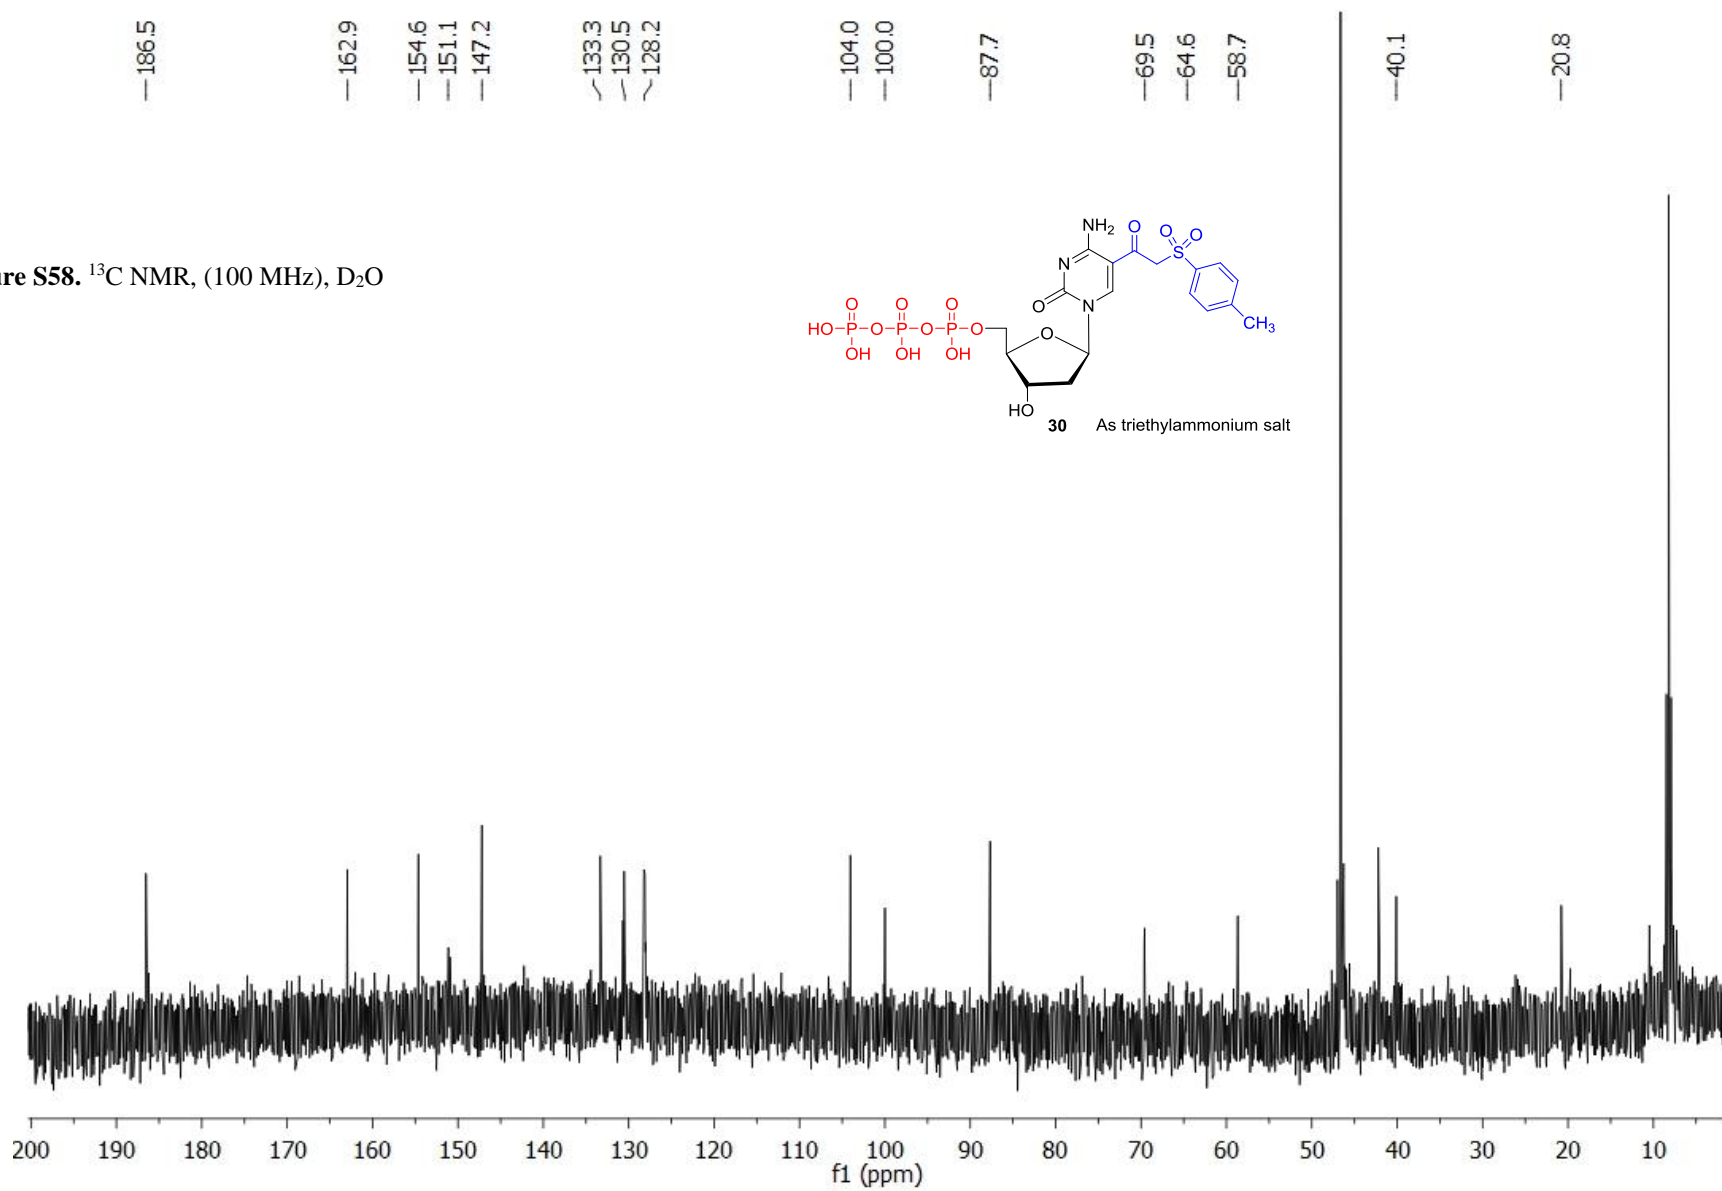

-10.77  
-10.88  
-11.65  
-11.78

-23.11  
-23.24  
-23.34

Figure S59.  $^{31}\text{P}$  NMR, (162 MHz),  $\text{D}_2\text{O}$

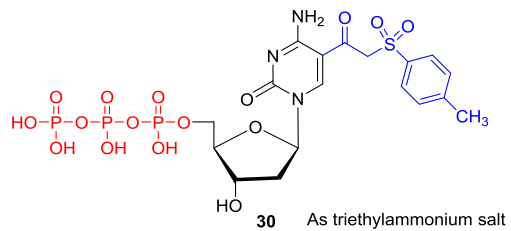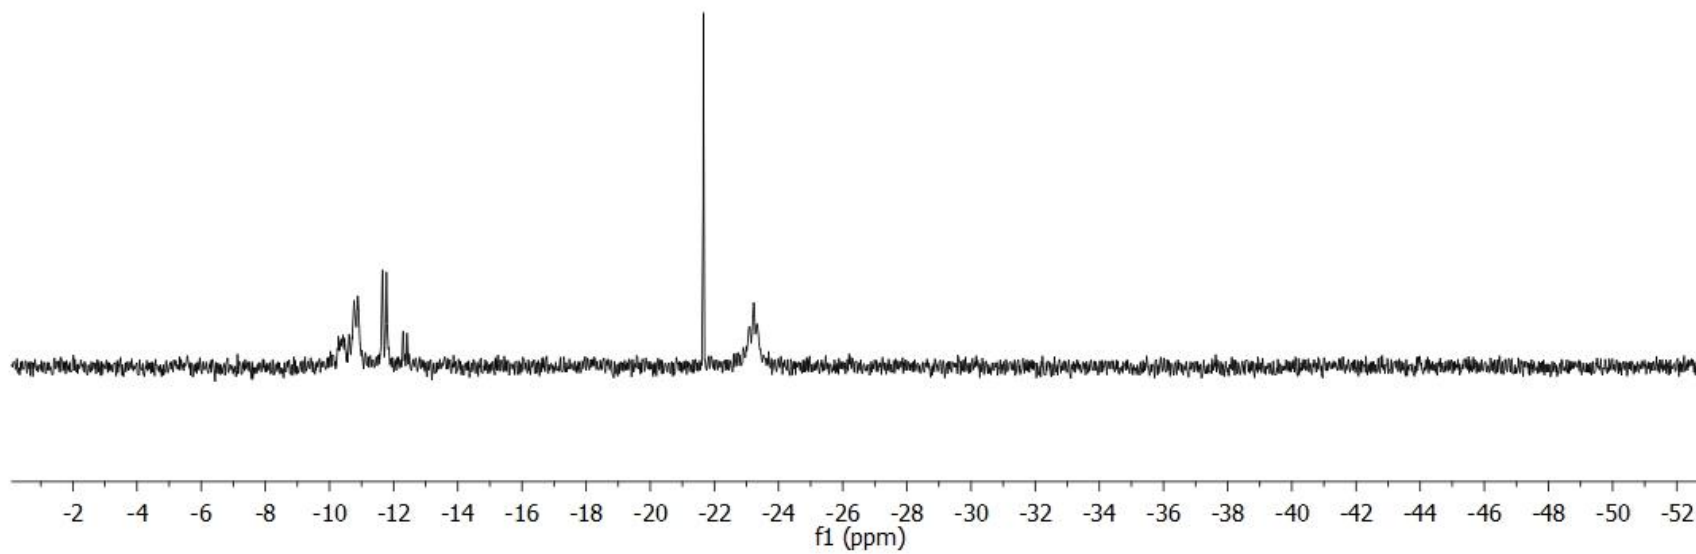

Supplement: ao8b00584_si_001.pdf [file ao8b00584_si_001.pdf]
